# Supplementary material for: Chemoselective isocyanide insertion into the N–H bond using iodine–DMSO: metal-free access to substituted ureas
Source: Royal Society of Chemistry journal article supplement (doi:10.1039/c8cc05019h), 2018-01-01
Supplement: c8cc05019h1.pdf [file c8cc05019h1.pdf]

## Electronic Supplementary Information

### Chemoselective isocyanide insertion into N-H bond using iodine-DMSO: A metal-free access to substituted ureas

Porag Bora and Ghanashyam Bez\*

*Department of Chemistry, North Eastern Hill University, Shillong-793022, India*

[ghanashyambez@yahoo.com](mailto:ghanashyambez@yahoo.com)

#### Content:

|                                                                                                   |         |
|---------------------------------------------------------------------------------------------------|---------|
| 1. General remarks                                                                                | S2      |
| 2. Table 1S: Optimization of reaction conditions                                                  | S2      |
| 3. Table 2S: Screening of additives                                                               | S3      |
| 4. Scheme 1S: Probable mechanism for degradative synthesis of dialkylureas from alkyl isocyanides | S4      |
| 5. Typical procedure (A) for synthesis of ureas from aliphatic amines                             | S4      |
| 6. Procedure (B) for synthesis of ureas from aromatic amines                                      | S4      |
| 7. Procedure (C) for amine-free synthesis of ureas from alkylisocyanides                          | S5      |
| 8. <sup>1</sup> H NMR and <sup>13</sup> C NMR data                                                | S5-S11  |
| 9. Method for preparation of <sup>18</sup> O-labeled dibenzylurea                                 | S11     |
| 10. HRMS spectrat of <sup>18</sup> O-labeled dibenzylurea                                         | S12     |
| 11. <sup>1</sup> H NMR and <sup>13</sup> C NMR spectra for the ureas                              | S13-S43 |
| 12. HPLC spectra                                                                                  | S44-45  |
| References                                                                                        | S46     |

**1. General remarks:** Commercial reagents were obtained from local suppliers and used as received. DMSO was purchased from Sigma Aldrich in a septum-sealed bottle. All the products were characterized by  $^1\text{H}$  NMR,  $^{13}\text{C}$  NMR and MS spectroscopy.  $^1\text{H}$  NMR (400 MHz) and  $^{13}\text{C}$  NMR (100 MHz) spectra were obtained on a Bruker AC-400 using  $\text{CDCl}_3$  and  $\text{DMSO-}d_6$  as solvent and solvent peaks as internal standard, unless otherwise stated. Data are reported as: (s = singlet, d = doublet, t = triplet, m = multiplet); coupling constants in Hz and chemical shift values in ppm. Infrared (IR) spectra were recorded on thin films on KBr pellets on a Perkin Elmer FT-IR spectrometer. HPLC analysis was performed on Waters M515 series equipped with a chiral column, using mixtures of *n*-hexane/isopropyl alcohol (IPA) as mobile phase. For column chromatography, we employed Merck silica gel 60-120 mesh.

**2. Table 1S: Optimization of reaction conditions**

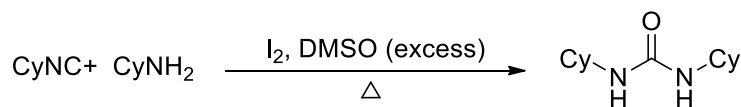

| Entry    | Iodine (eqv.) | Amine (eqv.) | Temperature (°C) | Time (h) | Yield (%) |
|----------|---------------|--------------|------------------|----------|-----------|
| 1        | 0.5           | 1.0          | 100              | 6        | 40        |
| 2        | 1.0           | 1.0          | 100              | 1        | 57        |
| 3        | 1.5           | 1.0          | 100              | 1        | 46        |
| 4        | 0.8           | 1.0          | 100              | 1        | 50        |
| <b>5</b> | <b>1.0</b>    | <b>1.5</b>   | <b>100</b>       | <b>1</b> | <b>89</b> |
| 6        | 1.0           | 2.0          | 100              | 1        | 72        |
| 7        | 1.0           | 1.5          | 110              | 1        | 64        |
| 8        | 1.0           | 1.5          | 120              | 1        | 54        |
| 9        | 1.0           | 1.5          | 90               | 5        | 75        |

Reaction conditions: CyNC (1 mmol), CyNH<sub>2</sub> (1.5 mmol), iodine (1 eqv.), and DMSO (2 mL)

### 3. Screening of additives

**Table 2S:** Screening of additives

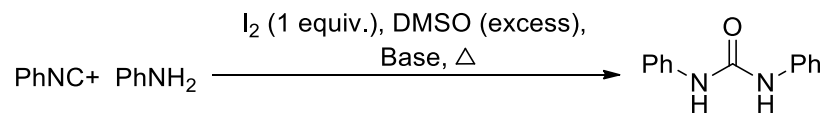

| Entry    | Additives (equiv.)    | Temp (°C)  | Time (h) | Yield (%) |
|----------|-----------------------|------------|----------|-----------|
| 1        | Et <sub>3</sub> N (1) | 100        | 3        | 0         |
| 2        | Pyridine (1)          | 100        | 3        | 23        |
| 3        | 2-Chloropyridine (1)  | 100        | 3        | 17        |
| 4        | DMAP (1)              | 100        | 3        | 0         |
| 5        | 2,6-Lutidine (1)      | 100        | 3        | 0         |
| 6        | Imidazole (1)         | 100        | 3        | 52        |
| 7        | Imidazole (1.5)       | 100        | 3        | 53        |
| <b>8</b> | <b>DABCO (1)</b>      | <b>100</b> | <b>3</b> | <b>65</b> |
| 9        | DABCO (1)             | 130        | 3        | 66        |
| 10       | DABCO (1)             | 100        | 5        | 62        |
| 11       | DABCO (1.5)           | 100        | 3        | 66        |
| 12       | DBU (1)               | 100        | 3        | 45        |

Reaction conditions: Aniline (1 mmol), Phenylisocyanide (1 mmol), iodine (1 eqv.), and DMSO (2 mL)

4. Probable mechanism for degradative synthesis of dialkylureas from alkyl isocyanides

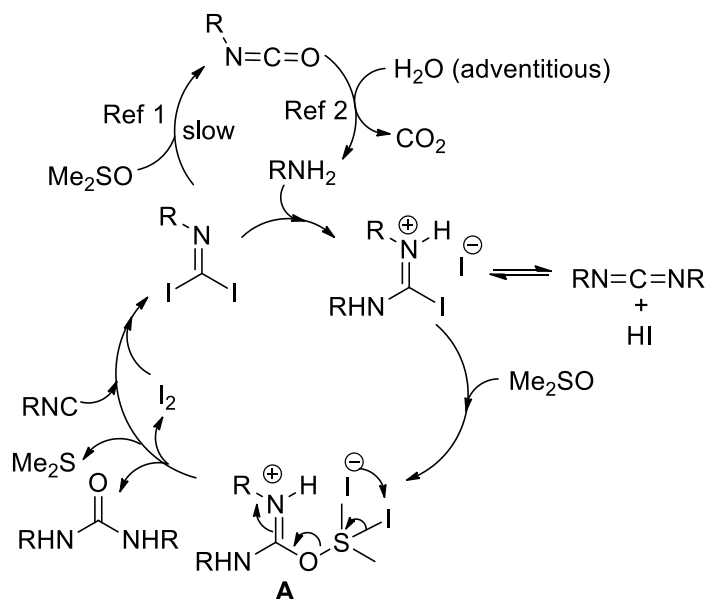

**Scheme S1.** Mechanism for degradative synthesis of dialkylureas

5. Typical procedure (A) for synthesis of ureas from aliphatic amines

Cyclohexyl isocyanide (1 mmol) and piperidine (1.5 mmol) in DMSO (2 mL) and iodine (1 mmol) was stirred at 100 °C for 1 h. After the completion of the reaction as monitored by TLC, 2 mL of ice-cold solution of sodium thiosulphate was added to the reaction mixture and extracted with ethyl acetate (15 mL× 3). Combined organic layers were washed successively with saturated solution of sodium thiosulphate and water and dried over anhydrous sodium sulfate. Evaporation of the solvent under reduced pressure yielded a off white solid which was further purified by passing through a short pad of silica gel column employing hexane: ethyl acetate (50:50) as eluent.

6. Procedure (B) for synthesis of ureas from aromatic amines

To a mixture of benzyl isocyanide (1 mmol), aniline (1.0 mmol) and DABCO (0.5 mmol) in 2 mL of DMSO, iodine (1 mmol) was added and stirred at 100 °C for 3 h. After the completion of the reaction as monitored by TLC, 2 mL of ice-cold solution of

sodium thiosulphate was added to the reaction mixture and extracted with ethyl acetate (15 mL× 3). Combined organic layers were washed successively with saturated solution of sodium thiosulphate and water and dried over anhydrous sodium sulfate. Solvent was evaporated under reduced pressure and the crude obtained was purified by employing silicagel column chromatography and hexane: ethyl acetate (80:20) as an eluent.

#### 7. Procedure (C) for amine-free synthesis of ureas from alkylisocyanides

Alkyl isocyanide (1 mmol) in 2 mL DMSO and iodine (1 mmol) was stirred at 100 °C for 4 h. After the completion of the reaction as monitored by TLC, 2 mL of ice-cold solution of sodium thiosulphate was added to the reaction mixture and extracted with ethyl acetate (15 mL× 3). Combined organic layers were washed successively with saturated solution of sodium thiosulphate and water and dried over anhydrous sodium sulfate. Evaporation of the solvent under reduced pressure yielded a crude solid which was further purified by passing through a short pad of silica gel column employing hexane: ethyl acetate (50:50) as eluent.

#### 8. Characterization and Spectral data of the urea derivatives

*N*-Cyclohexylpyrrolidine-1-carboxamide (**1a**):<sup>3</sup> White solid, m.p. 136- 137 °C, <sup>1</sup>H NMR (400 MHz, CDCl<sub>3</sub>): δ 4.01 (d, *J* = 8.0 Hz, 1 H), 3.68 – 3.59 (m, 1H), 3.31 (t, *J* = 6.8 Hz, 4 H), 1.97 – 1.86 (m, 6 H), 1.71 – 1.65 (m, 2 H), 1.62 – 1.57 (m, 1H), 1.37 – 1.30 (m, 2 H), 1.14 – 1.03 (m, 3 H) ppm. <sup>13</sup>C NMR (100 MHz, CDCl<sub>3</sub>): δ 156.3, 49.0, 45.5, 34.3, 25.77, 25.6, 25.1 ppm. MS (ESI): *m/z* = 196.83 [M]<sup>+</sup>. IR (KBr): ν = 3285, 2929, 1624, 1533, 1404, 1359 cm<sup>-1</sup>.

*N*-Cyclohexylpiperidine-1-carboxamide (**1b**):<sup>4</sup> White solid, m.p. 134- 136 °C, <sup>1</sup>H NMR (400 MHz, CDCl<sub>3</sub>): δ 4.26 (d, *J* = 6.0 Hz, 1 H), 3.64 – 3.59 (m, 1 H), 3.29 – 3.26 (m, 4 H), 1.94 – 1.83 (m, 3 H), 1.69 – 1.65 (m, 2 H), 1.60 – 1.52 (m, 6H), 1.39 – 1.30 (m, 2 H), 1.17 – 1.02 (m, 3 H) ppm. <sup>13</sup>C NMR (100 MHz, CDCl<sub>3</sub>): δ 157.0, 49.3, 44.7, 33.9, 25.6, 25.5, 25.1, 24.4 ppm. MS (ESI): *m/z* = 210.91 [M]<sup>+</sup>. IR (KBr): ν = 3329, 1651, 1596, 1552, 1232 cm<sup>-1</sup>.

*N-Cyclohexylmorpholine-4-carboxamide (1c)*:<sup>5</sup> White solid, m.p. 172 - 174 °C, <sup>1</sup>H NMR (400 MHz, CDCl<sub>3</sub>): δ 4.26 (d, *J* = 6.0 Hz, 1 H), 3.67 (t, *J* = 4.8 Hz, 4 H), 3.64-3.60 (m, 1 H), 3.10 (t, *J* = 4.8 Hz, 4 H), 1.95- 1.92 (m, 2 H), 1.71 – 1.59 (m, 3 H), 1.40 – 1.30 (m, 2 H), 1.16 – 1.03 (m, 3 H) ppm. <sup>13</sup>C NMR (100 MHz, CDCl<sub>3</sub>): δ 157.2, 66.5, 49.5, 44.0, 33.9, 25.6, 25.1 ppm. MS (ESI): *m/z* = 212.86 [M]<sup>+</sup>. IR (KBr): ν = 3310, 2931, 1615, 1542, 1275, 1109 cm<sup>-1</sup>.

*1-Cyclohexyl-3-(1-phenylethyl)urea (1d)*:<sup>6</sup> White solid, m.p. 130 – 132 °C, <sup>1</sup>H NMR (400 MHz, CDCl<sub>3</sub>): δ 7.26 – 7.18 (m, 5 H), 4.70 – 4.63 (m, 2 H), 4.21 – 4.16 (m, 1 H), 3.44 – 3.38 (m, 1 H), 1.86 – 1.44 (m, 5 H), 1.37 (d, *J* = 6.0 Hz, 3 H), 1.25 – 0.99 (m, 5 H) ppm. <sup>13</sup>C NMR (100 MHz, CDCl<sub>3</sub>): δ 157.5, 144.7, 128.6, 127.1, 125.9, 49.9, 48.8, 48.7, 34.0, 33.8, 33.7, 25.7, 25.6, 25.0, 24.9, 24.8, 23.5 ppm. MS (ESI): *m/z* = 247.02 [M]<sup>+</sup>. IR (KBr): ν = 3317, 2929, 1626, 1575, 1247 cm<sup>-1</sup>.

*1-Benzyl-3-cyclohexylurea (1e)*:<sup>7</sup> White solid, m.p. 77- 78 °C, <sup>1</sup>H NMR (400 MHz, CDCl<sub>3</sub>): δ 7.31 – 7.16 (m, 5 H), 5.11 – 5.08 (m, 1 H), 4.72 (d, *J* = 8.8 Hz, 1 H), 4.30 (d, *J* = 5.2 Hz, 2 H), 3.52 – 3.45 (m, 1 H), 1.89 – 1.85 (m, 2 H), 1.66 – 1.61 (m, 3 H), 1.34 – 1.25 (m, 2 H), 1.09 – 1.00 (m, 3 H) ppm. <sup>13</sup>C NMR (100 MHz, CDCl<sub>3</sub>): δ 158.4, 139.8, 128.5, 127.2, 127.0, 48.8, 44.0, 33.9, 25.6, 25.0 ppm. MS (ESI): *m/z* = 232.88 [M]<sup>+</sup>. IR (KBr): ν = 3328, 2905, 1626, 1567, 1279, 1244 cm<sup>-1</sup>.

*3-Cyclohexyl-1,1-diethylurea (1f)*:<sup>8</sup> White solid, m.p. 82- 84 °C, <sup>1</sup>H NMR (400 MHz, CDCl<sub>3</sub>): δ 4.16 (d, *J* = 7.6 Hz, 1 H), 3.60 – 3.52 (m, 1 H), 3.18 (q, *J* = 6.8 Hz, 4 H), 1.87 – 1.83 (m, 2 H), 1.62 – 1.48 (m, 3 H), 1.32 – 1.22 (m, 2 H), 1.07 – 0.97 (m, 9 H) ppm. . <sup>13</sup>C NMR (100 MHz, CDCl<sub>3</sub>): δ 156.6, 49.2, 41.0, 34.0, 25.7, 25.1, 13.8 ppm. MS (ESI): *m/z* = 199.06 [M]<sup>+</sup>. IR (KBr): ν = 3328, 1663, 1589, 1560, 1226 cm<sup>-1</sup>.

*N,N'-Dicyclohexylurea (1g)*:<sup>7</sup> White solid, m.p. 232 - 234 °C, <sup>1</sup>H NMR (400 MHz, CDCl<sub>3</sub>): δ 4.10 (d, *J* = 6.8 Hz, 2 H), 3.51 - 3.43 (m, 2 H), 1.95 – 1.91 (m, 4 H), 1.72 – 1.57 (m, 6 H), 1.40 – 1.29 (m, 4 H), 1.20 – 1.04 (m, 6 H) ppm. <sup>13</sup>C NMR (100 MHz, CDCl<sub>3</sub> and few drops of DMSO-*d*<sub>6</sub>): δ 156.6, 47.4, 33.3, 25.2, 24.4 ppm. MS (ESI): *m/z* = 225.06 [M]<sup>+</sup>. IR (KBr): ν = 3328, 2929, 1627, 1575, 1271, 1244 cm<sup>-1</sup>.

*N*-Benzylpyrrolidine-1-carboxamide (**1h**):<sup>9</sup> White solid, m.p. 122- 124 °C, <sup>1</sup>H NMR (400 MHz, CDCl<sub>3</sub>): δ 7.33 – 7.25(m, 5 H), 4.50 – 4.43 (m, 3 H), 3.36 (t, *J* = 6.8 Hz, 4 H), 1.92 – 1.89 (m, 4 H) ppm. <sup>13</sup>C NMR (100 MHz, CDCl<sub>3</sub>): δ 155.7, 138.8, 127.4, 126.6, 126.08, 44.5, 43.5, 24.5 ppm. MS (ESI): *m/z* = 204.85 [M]<sup>+</sup>. IR (KBr): ν = 3290, 1621, 1541, 1400, 1350, 1234 cm<sup>-1</sup>.

*N*-Benzylpiperidine-1-carboxamide (**1i**):<sup>7</sup> White solid, m.p. 97- 99 °C, <sup>1</sup>H NMR (400 MHz, CDCl<sub>3</sub>): δ 7.25 – 7.17 (m, 5 H), 4.68 (s, 1 H), 4.35 (d, *J* = 5.2 Hz, 2 H), 3.27 (t, *J* = 5.2 Hz, 4 H), 1.52 – 1.45 (m, 6 H) ppm. <sup>13</sup>C NMR (100 MHz, CDCl<sub>3</sub>): δ 157.5, 139.6, 128.4, 127.5, 127.0, 44.7, 25.5, 24.2 ppm. MS (ESI): *m/z* = 218.83 [M]<sup>+</sup>. IR (KBr): ν = 3326, 1640, 1588, 1546, 1233 cm<sup>-1</sup>.

*N*-Benzylmorpholine-4-carboxamide (**1j**):<sup>10</sup> White solid, m.p. 104- 106 °C, <sup>1</sup>H NMR (400 MHz, CDCl<sub>3</sub>): δ 7.36 – 7.26 (m, 5 H), 4.74 (s, 1 H), 4.44 (s, 2 H), 3.70 (t, *J* = 4.0 Hz, 3 H), 3.38 (t, *J* = 4.0 Hz, 3 H) ppm. <sup>13</sup>C NMR (100 MHz, CDCl<sub>3</sub>): δ 157.8, 139.3, 128.6, 127.6, 127.3, 66.4, 44.8, 43.9 ppm. MS (ESI): *m/z* = 221.02 [M]<sup>+</sup>. IR (KBr): ν = 3321, 1624, 1543, 1407, 1269, 1118 cm<sup>-1</sup>.

*N,N'*-Dibenzylurea (**1k**):<sup>11</sup> White solid, m.p. 165- 167 °C, <sup>1</sup>H NMR (400 MHz, DMSO-*d*<sub>6</sub>): δ 7.34 – (m, 10 H), 4.66 (s, 2 H), 4.39 (d, *J* = 4.8 Hz, 4 H) ppm. <sup>13</sup>C NMR (100 MHz, DMSO-*d*<sub>6</sub>): δ 158.0, 140.9, 128.2, 126.9, 126.5, 42.9 ppm. MS (ESI): *m/z* = 240.80 [M]<sup>+</sup>. IR (KBr): ν = 3030, 3321, 1626, 1573, 1246 cm<sup>-1</sup>.

*l*-Benzyl-3-(*l*-phenylethyl)urea (**1l**):<sup>12</sup> White solid, m.p. 125- 126 °C, <sup>1</sup>H NMR (400 MHz, ) δ 7.46 – 7.18 (m, 14H), 7.15 (d, *J* = 6.6 Hz, 3H), 4.79 (dd, *J* = 13.0, 6.4 Hz, 3H), 4.65 (s, 1H), 4.36 (d, *J* = 5.2 Hz, 2H), 4.30 (t, *J* = 6.4 Hz, 2H), 1.43 (d, *J* = 6.0 Hz, 5H). <sup>13</sup>C NMR (100 MHz, CDCl<sub>3</sub>): δ 158.1, 144.4, 139.4, 128.5, 128.4, 127.2, 127.1, 127.0, 125.8, 49.8, 44.0, 23.2 ppm. MS (ESI): *m/z* = 218.83 [M]<sup>+</sup>. IR (KBr): ν = 3335, 3320 1652, 1591, 1545, 1224 cm<sup>-1</sup>.

*l*-Benzyl-3-butylurea (**1m**):<sup>11</sup> White solid, m.p. 100- 102 °C, <sup>1</sup>H NMR (400 MHz, CDCl<sub>3</sub>): δ 7.21 – 7.15 (m, 5 H), 5.13 (s, 1 H), 4.79 (s, 1 H), 4.21 (d, *J* = 5.6 Hz, 2 H), 3.03 (q, *J* = 6.4 Hz, 2 H), 1.33 – 1.28 (m, 2 H), 1.24 – 1.15 (m, 2 H), 0.81 (t, *J* = 7.2 Hz, 3

H) ppm.  $^{13}\text{C}$  NMR (100 MHz,  $\text{CDCl}_3$ ):  $\delta$  159.0, 139.6, 128.4, 127.1, 126.9, 44.0, 40.0, 32.3, 20.0, 13.8 ppm. MS (ESI):  $m/z = 207.05$   $[\text{M}]^+$ . IR (KBr):  $\nu = 3339, 2954, 1626, 1594, 1270 \text{ cm}^{-1}$ .

*1-((3s,5s,7s)-Adamantan-1-yl)-3-benzylurea (1n)*:<sup>13</sup> White solid, m.p. 148- 150 °C,  $^1\text{H}$  NMR (400 MHz,  $\text{CDCl}_3$ ):  $\delta$  7.25 – 7.15 (m, 5 H), 5.07 (s, 3 H), 4.65 (s, 1 H), 4.19 (d,  $J = 5.2$  Hz, 2 H), 1.96 (s, 3 H), 1.84 (s, 6 H), 1.56 (s, 6 H) ppm.  $^{13}\text{C}$  NMR (100 MHz,  $\text{CDCl}_3$ ):  $\delta$  157.7, 139.6, 128.4, 127.2, 127.1, 50.6, 43.8, 42.3, 36.4, 29.5 ppm. MS (ESI):  $m/z = 285.03$   $[\text{M}]^+$ . IR (KBr):  $\nu = 3350, 2906, 1625, 1569, 1279, 1243, 1090 \text{ cm}^{-1}$ .

*N-(tert-Butyl)pyrrolidine-1-carboxamide (1o)*:<sup>14</sup> White solid, m.p. 120- 122 °C,  $^1\text{H}$  NMR (400 MHz,  $\text{CDCl}_3$ ):  $\delta$  4.02 (s, 1 H), 3.27 (t,  $J = 6.4$  Hz, 4 H), 1.87 (m, 4 H), 1.33 (s, 9 H) ppm.  $^{13}\text{C}$  NMR (100 MHz,  $\text{CDCl}_3$ ):  $\delta$  156.2, 50.5, 45.3, 29.5, 25.5 ppm. MS (ESI):  $m/z = 171.04$   $[\text{M}]^+$ . IR (KBr):  $\nu = 3347, 2969, 1632, 1529, 1388, 1219 \text{ cm}^{-1}$ .

*N-(tert-Butyl)piperidine-1-carboxamide (1p)*:<sup>15</sup> White solid, m.p. 140- 142 °C,  $^1\text{H}$  NMR (400 MHz,  $\text{CDCl}_3$ ):  $\delta$  4.29 (s, 1H), 3.33 – 3.14 (m, 4H), 1.60 – 1.45 (m, 6H), 1.34 (s, 9H).  $^{13}\text{C}$  NMR (100 MHz,  $\text{CDCl}_3$ ):  $\delta$  157.1, 76.7, 44.8, 77.3, 50.5, 77.0, 29.5, 24.4, 25.6 ppm. MS (ESI):  $m/z = 184.13$   $[\text{M}]^+$ . IR:  $\nu = 3339, 2958, 1645, 1552, 1222 \text{ cm}^{-1}$ .

*N-(tert-Butyl)morpholine-4-carboxamide (1q)*:<sup>16</sup> White solid, m.p. 182- 184 °C,  $^1\text{H}$  NMR (400 MHz,  $\text{CDCl}_3$ ):  $\delta$  4.29 (s,1 H), 3.66 (t,  $J = 4.8$  Hz, 4 H), 3.27 (t,  $J = 4.8$  Hz, 4 H), 1.37 (s, 9 H) ppm.  $^{13}\text{C}$  NMR (100 MHz,  $\text{CDCl}_3$ ):  $\delta$  157.0, 66.4, 50.8, 43.9, 29.3 ppm. MS (ESI):  $m/z = 186.82$   $[\text{M}]$ . IR (KBr):  $\nu = 3359, 2973, 1622, 1537, 1274, 1109 \text{ cm}^{-1}$ .

*1-Benzyl-3-(tert-butyl)urea (1r)*:<sup>17</sup> White solid, m.p. 107- 108 °C,  $^1\text{H}$  NMR (400 MHz,  $\text{CDCl}_3$ ):  $\delta$  7.30 – 7.22 (m, 5 H), 4.94 (s, 1 H), 4.63 (s, 1 H), 4.25 (s, 2 H), 1.29 (s, 9 H) ppm.  $^{13}\text{C}$  NMR (100 MHz,  $\text{CDCl}_3$ ):  $\delta$  158.2, 139.9, 128.3, 127.1, 126.8, 49.9, 43.7, 29.5 ppm. MS (ESI):  $m/z = 206.92$   $[\text{M}]^+$ . IR (KBr):  $\nu = 3331, 3319, 1647, 1591, 1549, 1227 \text{ cm}^{-1}$ .

*1-Cyclohexyl-3-phenylurea (1s)*:<sup>14</sup> White solid, m.p. 179- 180 °C,  $^1\text{H}$  NMR (400 MHz,  $\text{CDCl}_3$ ):  $\delta$  7.61 (s, 1 H), 7.16 – 7.12 (m, 2 H), 7.01 – 6.96 (m, 2 H), 6.71 (t,  $J = 7.2$  Hz, 1 H), 5.42 (s, 1 H), 3.52 – 3.43 (m, 1 H), 1.72 (dd,  $J = 12.4$  Hz, 4.0 Hz, 2 H), 1.49 – 1.43



(m, 2 H), 1.37 – 1.34 (m, 1 H), 1.15 – 1.08 (m, 2 H), 0.95 – 0.89 (m, 3 H) ppm. <sup>13</sup>C NMR (100 MHz, CDCl<sub>3</sub>): δ 155.3, 140.1, 128.6, 121.4, 118.3, 48.1, 33.5, 25.5, 24.7 ppm. MS (ESI): *m/z* = 218.07 [M]<sup>+</sup>. IR (KBr): ν = 3337, 3321, 1645, 1583, 1546, 1241 cm<sup>-1</sup>.

*1-Benzyl-3-phenylurea (1t)*:<sup>9</sup> White solid, m.p. 167- 170 °C, <sup>1</sup>H NMR (400 MHz, CDCl<sub>3</sub>): δ 7.33 – 7.23 (m, 9 H), 7.08 – 7.05 (m, 1 H), 6.59 (s, 1 H), 5.26 (s, 1 H), 4.40 (d, *J* = 5.6 Hz, 2 H) ppm. <sup>13</sup>C NMR (100 MHz, CDCl<sub>3</sub>): δ 155.4, 139.7, 139.3, 128.2, 127.9, 127.0, 126.5, 121.1, 117.7, 43.0 ppm. MS (ESI): *m/z* = 127.08 [M]<sup>+</sup>. IR (KBr): ν = 3328, 1634, 1555, 1234 cm<sup>-1</sup>.

*N-phenylpiperidine-1-carboxamide (1u)*:<sup>11</sup> White solid, m.p. 171- 173 °C <sup>1</sup>H NMR (400 MHz, CDCl<sub>3</sub>) δ = 7.46 – 7.19 (m, 4 H), 7.02 (t, *J*=7.3 Hz, 1H), 6.39 (s, 1H), 3.80 – 2.92 (t, *J*=4.8 Hz, 4 H), 1.67 – 1.44 (m, 6 H) ppm. <sup>13</sup>C NMR (100 MHz, CDCl<sub>3</sub>): δ 154.9, 139.2, 128.8, 122.8, 119.7, 45.2, 25.6, 24.3 ppm. MS (ESI): *m/z* = 205.31 [M+H]<sup>+</sup>. IR: ν = 3333, 3319, 1641, 1571, 1545, 1240 cm<sup>-1</sup>.

*N-Phenylmorpholine-4-carboxamide (1v)*:<sup>17</sup> White solid, m.p. 158- 159 °C <sup>1</sup>H NMR (400 MHz, CDCl<sub>3</sub>): δ 7.50 – 7.16 (m, 1H), 7.06 (t, *J*=7.2, 1H), 6.34 (s, 1H), 3.74 (t, *J*=4.8 Hz, 4 H), 3.48 (t, *J*=4.8 Hz, 4 H) ppm. <sup>13</sup>C NMR (100 MHz, CDCl<sub>3</sub>): δ 155.1, 138.6, 128.9, 123.3, 120.0, 66.4, 44.2 ppm. *m/z* = 207.21 [M+H]<sup>+</sup>. IR (KBr): ν = 3331, 3323, 1642, 1569, 1546, 1239 cm<sup>-1</sup>.

*N-(4-Methoxyphenyl)morpholine-4-carboxamide (1w)*:<sup>16</sup> <sup>1</sup>H NMR (400 MHz, CDCl<sub>3</sub>): δ 7.23 (d, *J* = 8.9 Hz, 2 H), 6.83 (d, *J*=8.9 Hz, 2 H), 6.43 (s, 1 H), 3.78 (s, 3 H), 3.70 (t, *J*= 4.8 Hz, 4 H), 3.50 – 3.35 (t, *J* = 4.8 Hz, 4 H) ppm; <sup>13</sup>C NMR (100 MHz, CDCl<sub>3</sub>): δ 156.0, 155.7, 131.6, 122.6, 114.0, 66.4, 55.4, 44.1 ppm; MS (ESI): *m/z* = 237.31 [M+H]<sup>+</sup>; IR (KBr): ν = 3331, 3318, 1644, 1572, 1542, 1238 cm<sup>-1</sup>.

*1-Benzyl-3-(4-methoxyphenyl)urea (1x)*:<sup>9</sup> White solid, m.p. 141- 143 °C, <sup>1</sup>H NMR (400 MHz, CDCl<sub>3</sub>): δ 7.31 – 7.22, (m, 4 H), 7.16 – 7.13 (m, 2 H), 6.84 – 6.81 (m, 2 H), 6.45 (s, 1 H), 5.16 (s, 1 H), 4.38 (d, *J* = 5.6 Hz, 2 H), 3.76 (s, 3 H) ppm. <sup>13</sup>C NMR (100 MHz, CDCl<sub>3</sub>): δ 156.0, 154.3, 139.4, 132.5, 127.9, 126.9, 126.5, 120.2, 113.5, 54.9, 43.1 ppm. MS (ESI): *m/z* = 257.05 [M]<sup>+</sup>. IR (KBr): ν = 3307, 1628, 1608, 1564, 1244 cm<sup>-1</sup>.

*(S)*-Methyl 2-(3-benzylureido)-3-phenylpropanoate (**2a**):<sup>18</sup> White solid, m.p. 96- 97 °C, <sup>1</sup>H NMR (400 MHz, CDCl<sub>3</sub>): δ 7.30 – 7.21 (m, 8 H), 7.07 – 7.05 (m, 2 H), 5.03 – 4.98 (m, 2 H), 4.80 – 4.76 (m, 1 H), 4.32 – 4.28 (m, 2 H), 3.66 (s, 3 H), 3.10 – 2.98 (m, 2 H) ppm. <sup>13</sup>C NMR (100 MHz, CDCl<sub>3</sub>): δ 173.2, 157.1, 138.9, 136.1, 136.3, 129.3, 128.4, 128.6, 127.3, 126.9, 53.9, 52.2, 44.4, 38.4 ppm. MS (ESI): *m/z* = 313.09 [M]<sup>+</sup>. IR (KBr): *v* = 3357, 3320, 1734, 1629, 1571, 1244, 1030 cm<sup>-1</sup>.

*(S)*-Methyl 2-(3-Cyclohexylureido)-3-phenylpropanoate (**2b**):<sup>18</sup> White solid, m.p. 115 – 116 °C, <sup>1</sup>H NMR (400 MHz, CDCl<sub>3</sub>): δ 7.23 (m, 3H), 7.05 (d, *J* = 7.2 Hz, 2 H), 4.71-4.67 (m, 1 H), 4.71 (d, *J* = 7.6 Hz, 1H), 4.24 (d, *J* = 7.2 Hz, 1 H), 3.65 (s, 3 H), 3.38-3.36 (m, 1 H), 3.04 – 2.98 (m, 2 H), 1.84 – 1.77 (m, 2 H), 1.61 – 1.49 (m, 3, H), 1.25 – 1.18 (m, 2 H), 1.04 – 0.99 (m, 3H) ppm. <sup>13</sup>C NMR (100 MHz, CDCl<sub>3</sub>): δ 173.5, 156.6, 136.3, 129.3, 128.4, 126.9, 53.9, 52.1, 49.1, 38.5, 33.7, 33.6, 25.5, 24.9, 24.8 ppm. MS (ESI): *m/z* = 305.02 [M]<sup>+</sup>. IR (KBr): *v* = 3317, 2936, 1735, 1627, 1561, 1221 cm<sup>-1</sup>.

1,3-di-*tert*-butylurea (**3a**):<sup>19</sup> White solid, m.p. 246-247 °C, <sup>1</sup>H NMR (400 MHz, CDCl<sub>3</sub>): δ 4.13 (s, 2 H), 1.30 (s, 18 H) ppm. <sup>13</sup>C NMR (100 MHz, CDCl<sub>3</sub>): δ 157.1, 50.1, 29.6 ppm. MS (ESI): *m/z* = 172.20 [M]<sup>+</sup>. IR (KBr): *v* = 3334, 1654, 1570, 1537, 1240 cm<sup>-1</sup>.

1,3-Di(1-*adamantyl*)urea (**3b**):<sup>7</sup> White solid, m.p.> 300 °C, <sup>1</sup>H NMR (400 MHz, DMSO-*d*<sub>6</sub>): 3.99 (s, 2H), 2.03 (s, 6H), 1.97 (s, 12H), 1.62 (s, 12H) ppm. MS (ESI): *m/z* = 328.65 [M]<sup>+</sup>. IR (KBr): *v* = 3350, 2911, 1673, 1661, 1193 cm<sup>-1</sup>.

1,3-Diphenylurea (**4a**):<sup>15</sup> White solid, m.p. 247-248 °C, <sup>1</sup>H NMR (400 MHz, CDCl<sub>3</sub> + DMSO-*d*<sub>6</sub>): δ 8.05 (s, 2 H), 7.31 (d, *J*=7.6 Hz, 4 H), 7.13 (t, *J*=7.9 Hz, 4 H), 6.85 (t, *J*=7.4 Hz, 2 H) ppm. <sup>13</sup>C NMR (100 MHz, CDCl<sub>3</sub> + DMSO-*d*<sub>6</sub>): δ 153.1, 139.4, 128.7, 122.1, 118.6 ppm. *m/z* = 212.20 [M]<sup>+</sup>. IR (KBr): *v* 3338, 1644, 1566, 1541, 1241 cm<sup>-1</sup>.

1-(4-Methoxyphenyl)-3-phenylurea (**4b**):<sup>15</sup> White solid, m.p. 187- 189 °C, <sup>1</sup>H NMR (400 MHz, CDCl<sub>3</sub>): δ 7.97 (s, 1 H), 7.87 (s, 1 H), 7.36 (d, *J* = 8.0 Hz, 2 H), 7.28 – 7.25 (m, 2 H), 7.20 (t, *J* = 7.6 Hz, 2 H), 6.91(t, *J* = 7.6 Hz, 1 H), 6.76 (d, *J* = 8.4 Hz, 2 H), 3.69 (s, 3 H) ppm. <sup>13</sup>C NMR (100 MHz, CDCl<sub>3</sub>): δ 154.6, 153.1, 139.4, 132.3, 128.4, 121.6, 120.3, 118.2, 113.6, 55.1 ppm. MS (ESI): *m/z* = 242.98 [M]<sup>+</sup>. IR (KBr): *v* = 3336, 3321, 1645, 1550, 1231 cm<sup>-1</sup>.

*1-Benzyl-3-(2-(4-chlorophenyl)-2-hydroxyethyl)urea (5)*: White solid, m.p. 178-180 °C, <sup>1</sup>H NMR (400 MHz, DMSO-*d*<sub>6</sub>): δ 7.51 – 7.26 (m, 5 H), 7.21-7.18 (m, 2 H), 6.49 (t, *J*=6.0, 1 H), 6.01 (t, *J*=5.5, 1 H), 5.64 (d, *J*=4.2, 1 H), 4.85 – 4.34 (m, 1 H), 4.17 (d, *J*=5.6 Hz, 2 H), 3.37 – 3.18 (m, 1 H), 3.12- 3.08 (m, 1 H) ppm. <sup>13</sup>C NMR (100 MHz, DMSO-*d*<sub>6</sub>): δ 158.1, 142.7, 140.7, 131.3, 128.1, 127.8, 127.8, 126.8, 126.4, 71.3, 47.1, 42.7 ppm. MS (ESI): *m/z* = 304.44 [M]<sup>+</sup>. IR (KBr): ν = 3562, 3364, 3296, 1615, 1193 cm<sup>-1</sup>.

## 9. Method for preparation of <sup>18</sup>O-labeled dibenzylurea

Me<sub>2</sub>SO<sup>18</sup> was synthesized following literature procedure.<sup>20</sup> The solid dimethylsulfur dibromide (5.0 g, 22.5 mmoles) prepared was added portion-wise over a period of 15 min to a vigorously stirred solution of freshly distilled triethylamine (6.3 ml, 45 mmoles) and <sup>18</sup>O-labeled water (0.20 ml, 11 mmoles) in 15 mL of anhydrous THF. The temperature of the reaction was maintained below 50 °C by occasional cooling in ice. The precipitate of triethylamine hydrobromide was removed by centrifugation and washed twice with ether. The combined yellow supernatant and washings were distilled at room temperature at reduced pressure (15 mm) to remove the solvent and the tan residue was distilled in a short-path apparatus (60-70 °C at 0.3 mm) giving 1.03 g of a pale yellow liquid. Without further purification the reaction was performed between benzyl isocyanide (57 mg, 0.5 mmol) and benzyl amine (80 mg, 0.75 mmol) as per optimized procedure. After the completion of the reaction as monitored by TLC, 2 mL of ice-cold solution of sodium thiosulphate was added to the reaction mixture and extracted with ethyl acetate (15 mL × 3). Combined organic layers were washed successively with saturated solution of sodium thiosulphate and water and dried over anhydrous sodium sulfate. Evaporation of the solvent under reduced pressure yielded the corresponding <sup>18</sup>O-derivative of dibenzylurea as an off-white solid which was further purified by passing through a short pad of silica gel column employing hexane: ethyl acetate (50:50) as eluent. ESI-MS analysis result clearly showed [M+H]<sup>+</sup> peak at 243.1425 corresponding to <sup>18</sup>O-derivative of dibenzylurea.

10. HRMS spectrat of  $^{18}\text{O}$ -labeled dibenzylurea and  $^{16}\text{O}$ -dibenzylurea

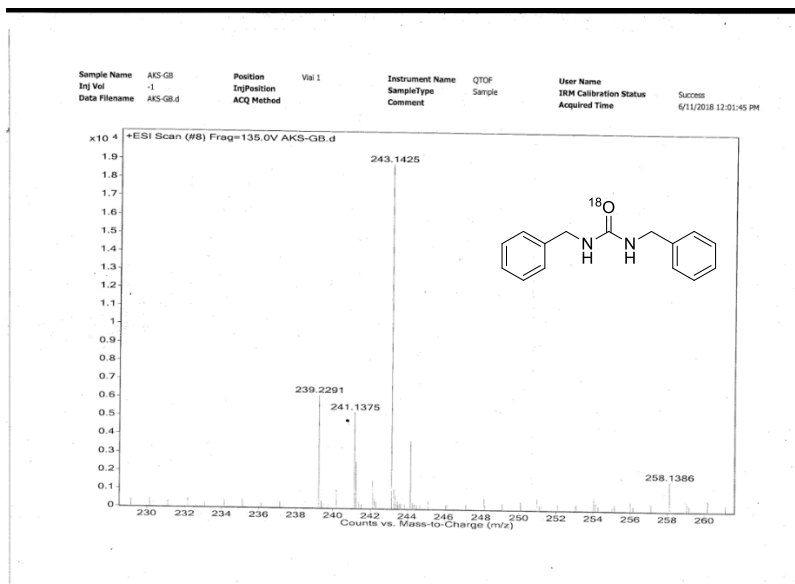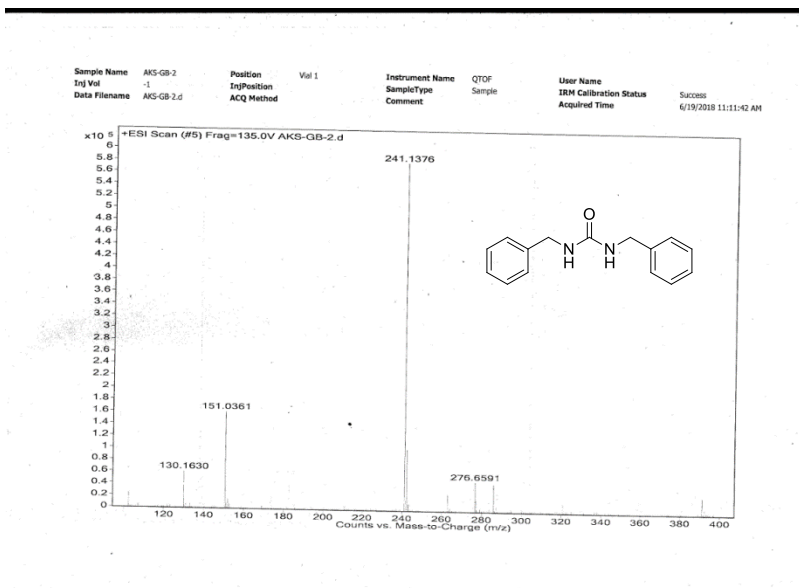

# 11. <sup>1</sup>H NMR and <sup>13</sup>C NMR spectra for the ureas

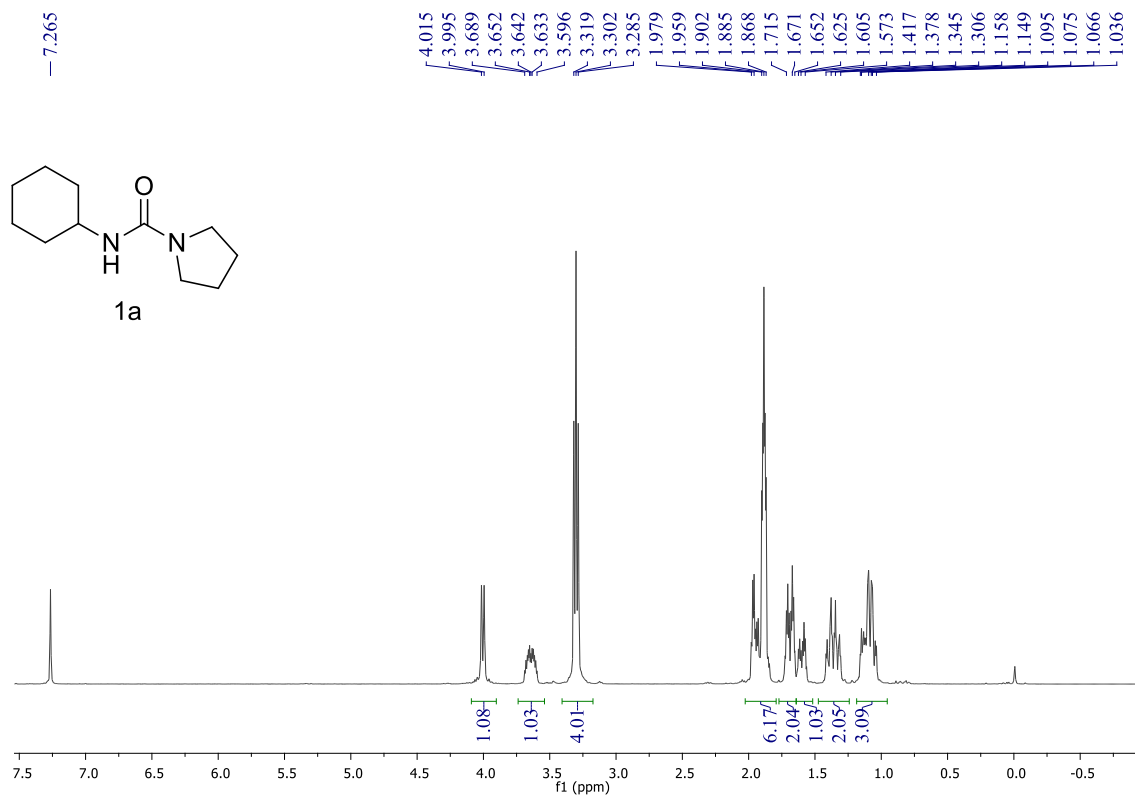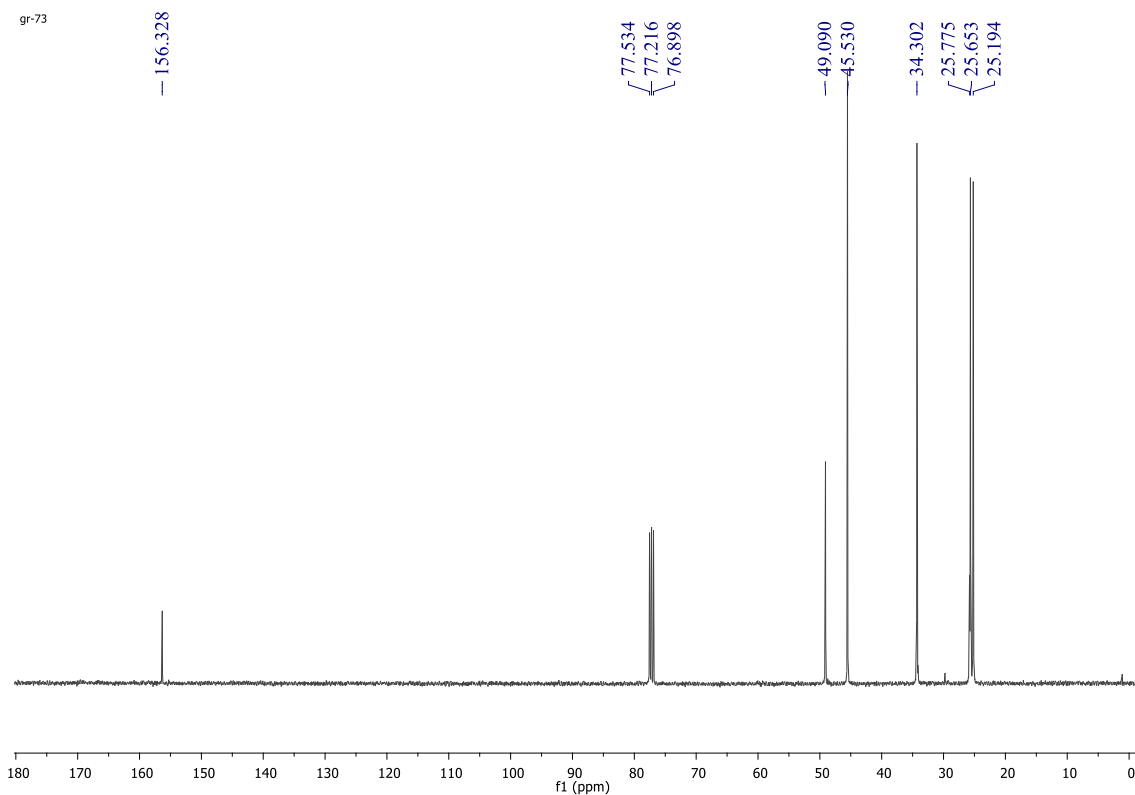

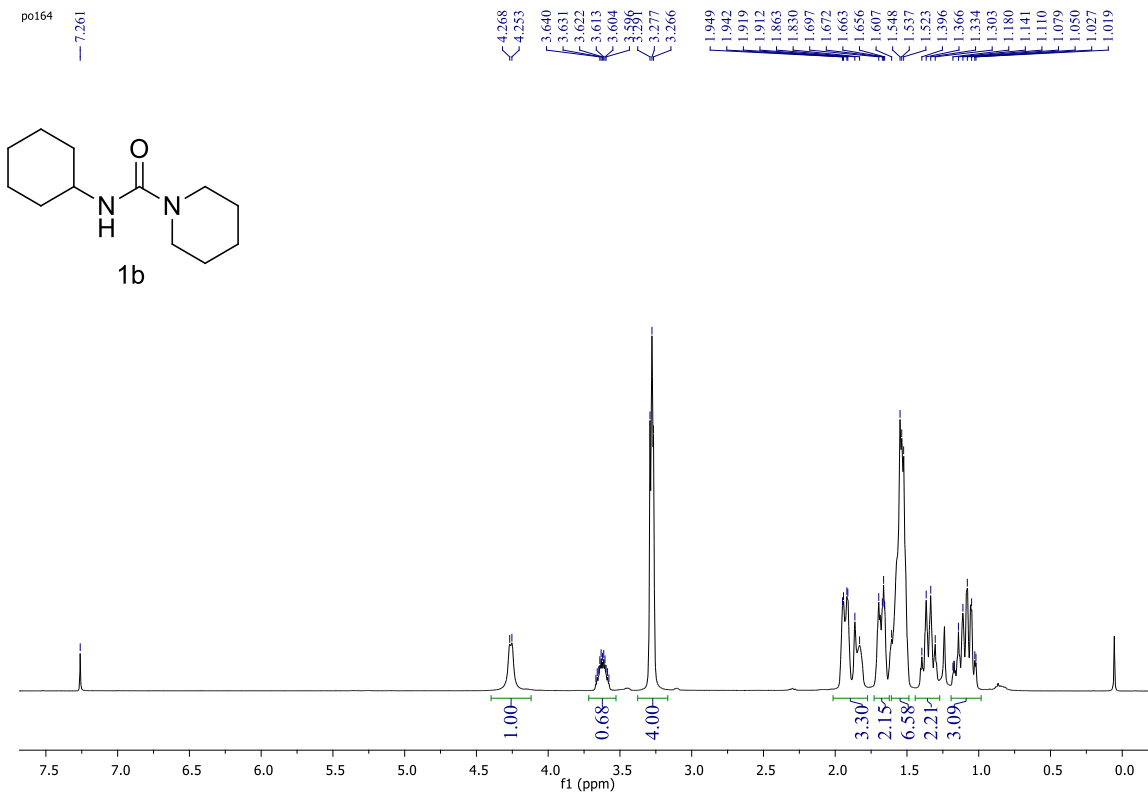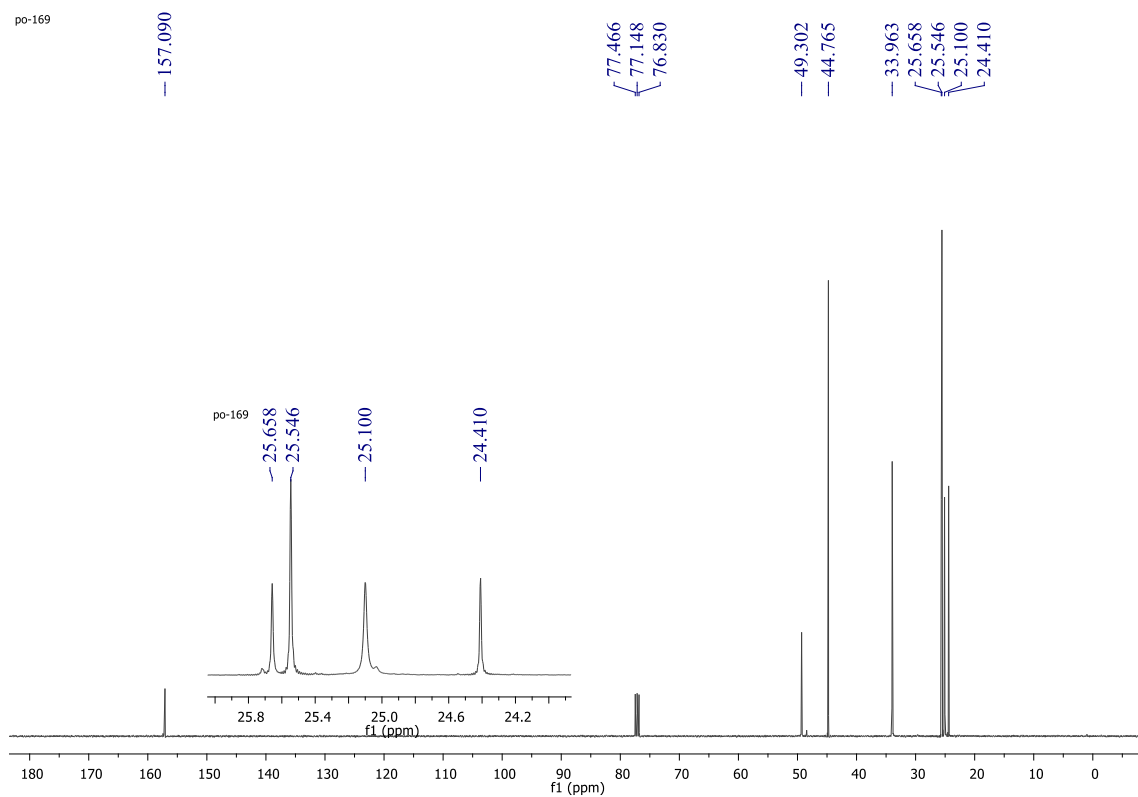

po-158

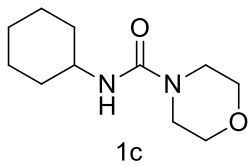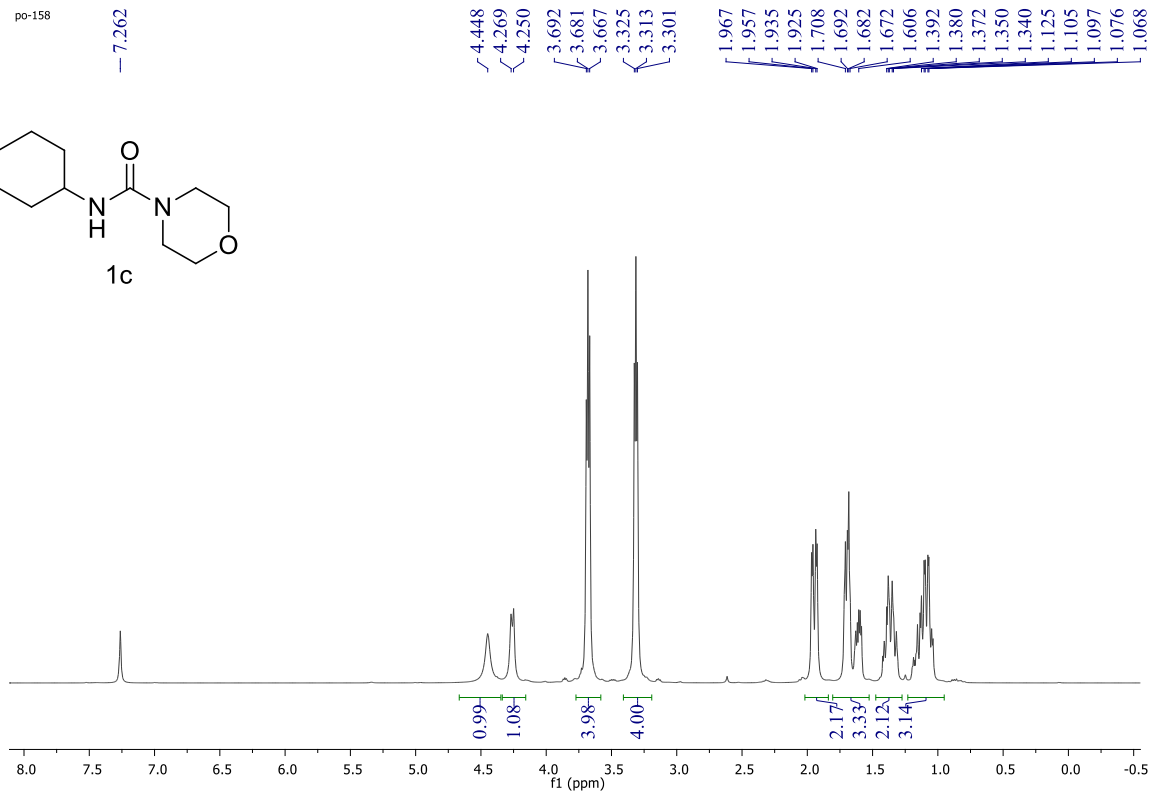

po-173

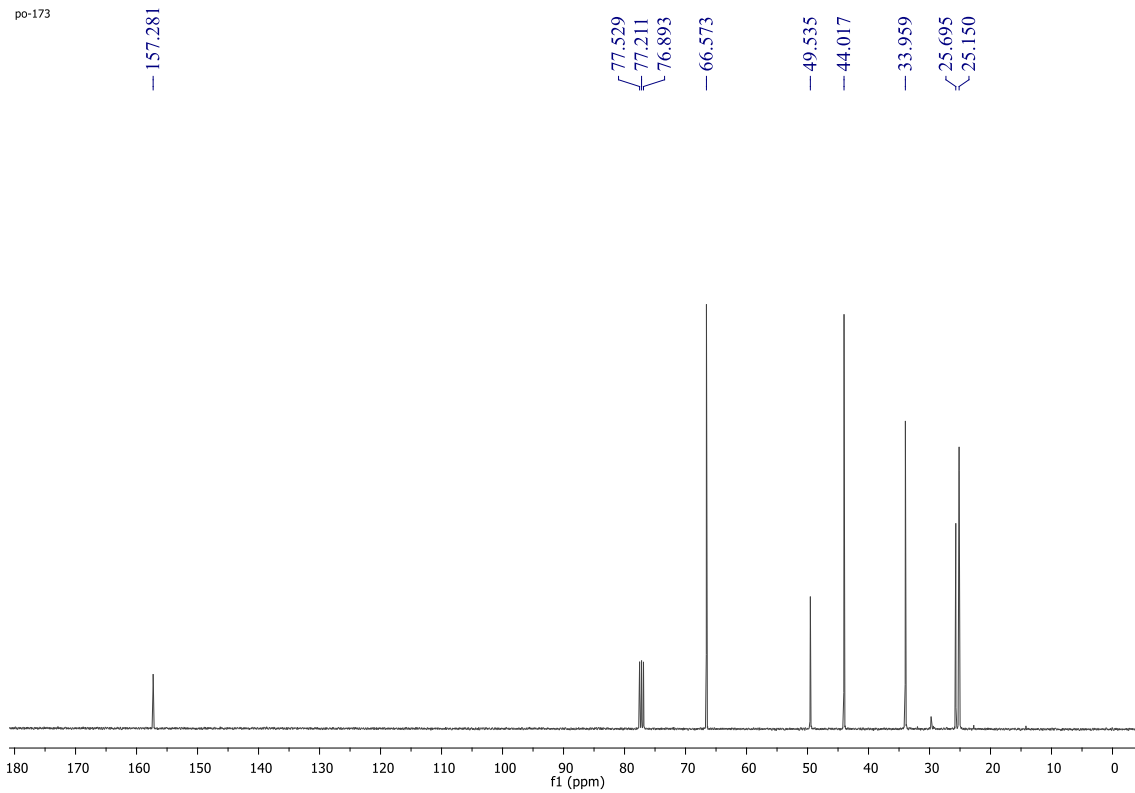

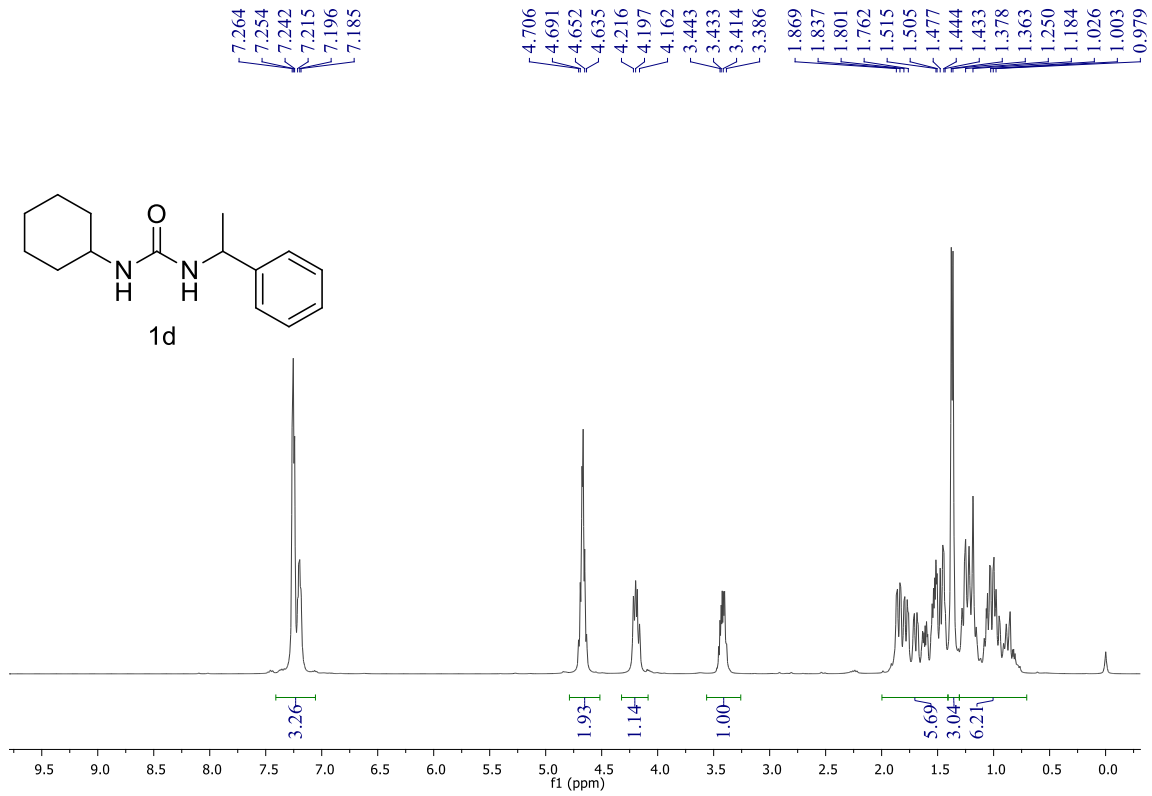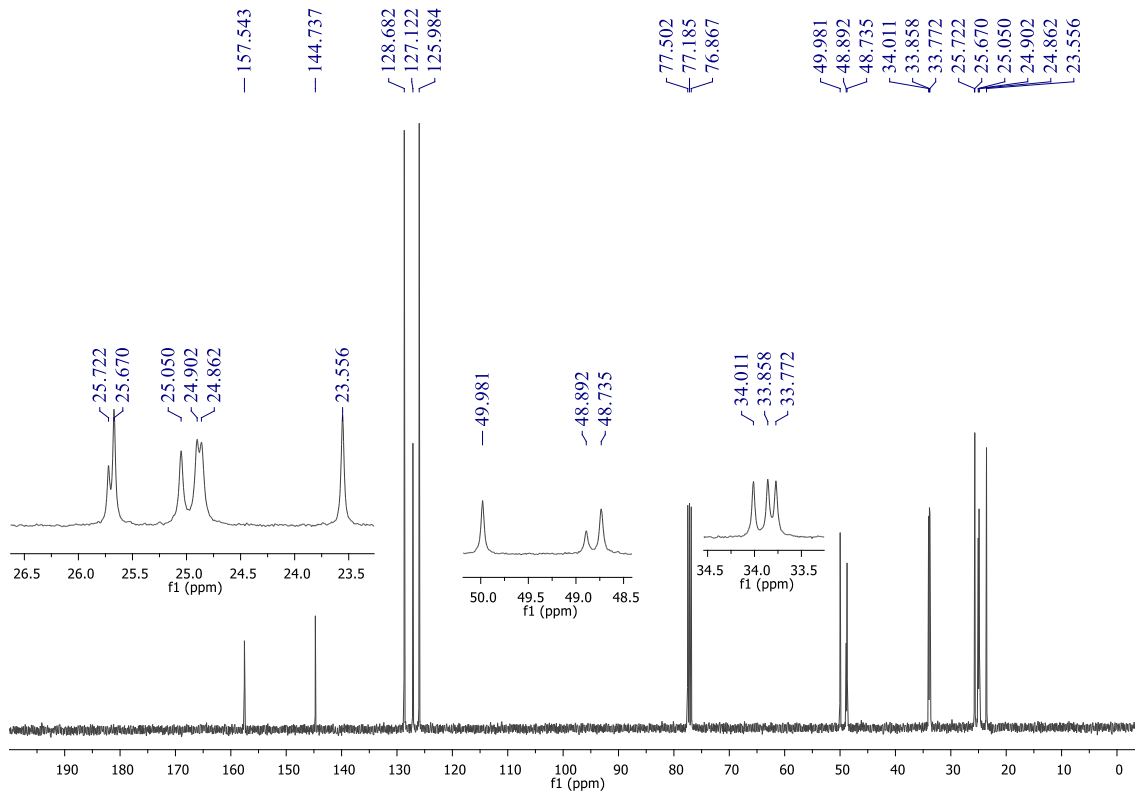



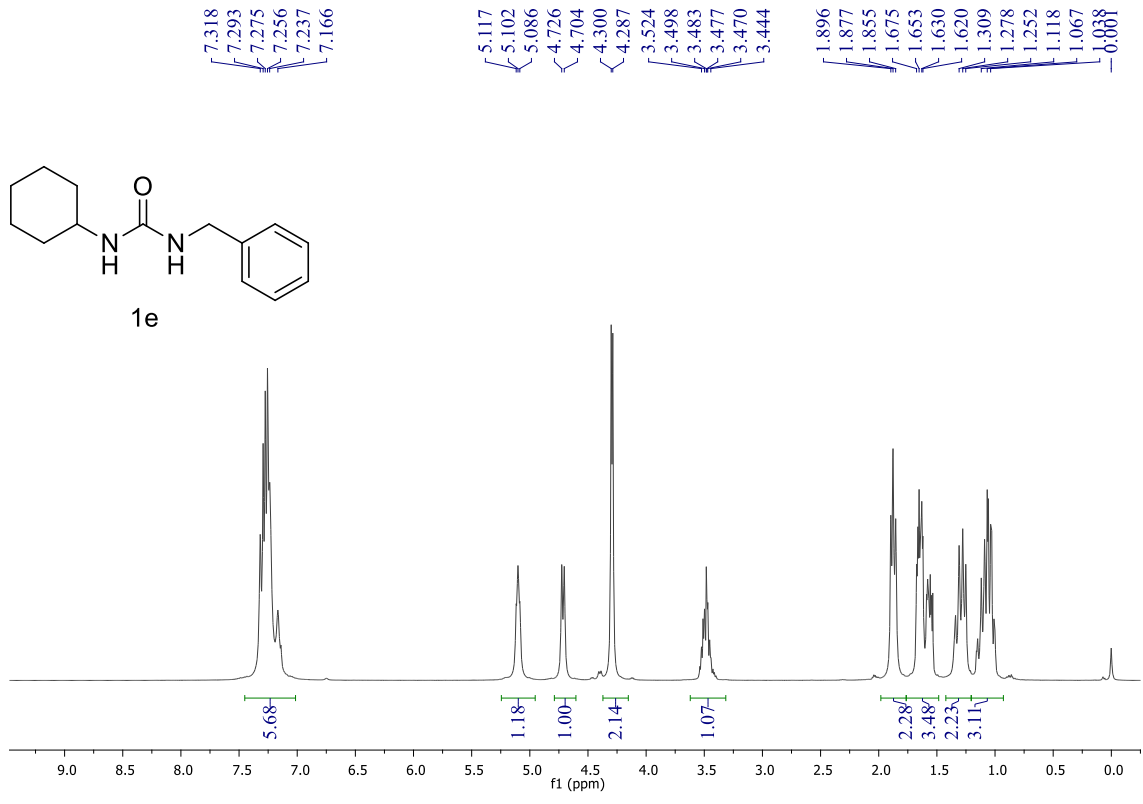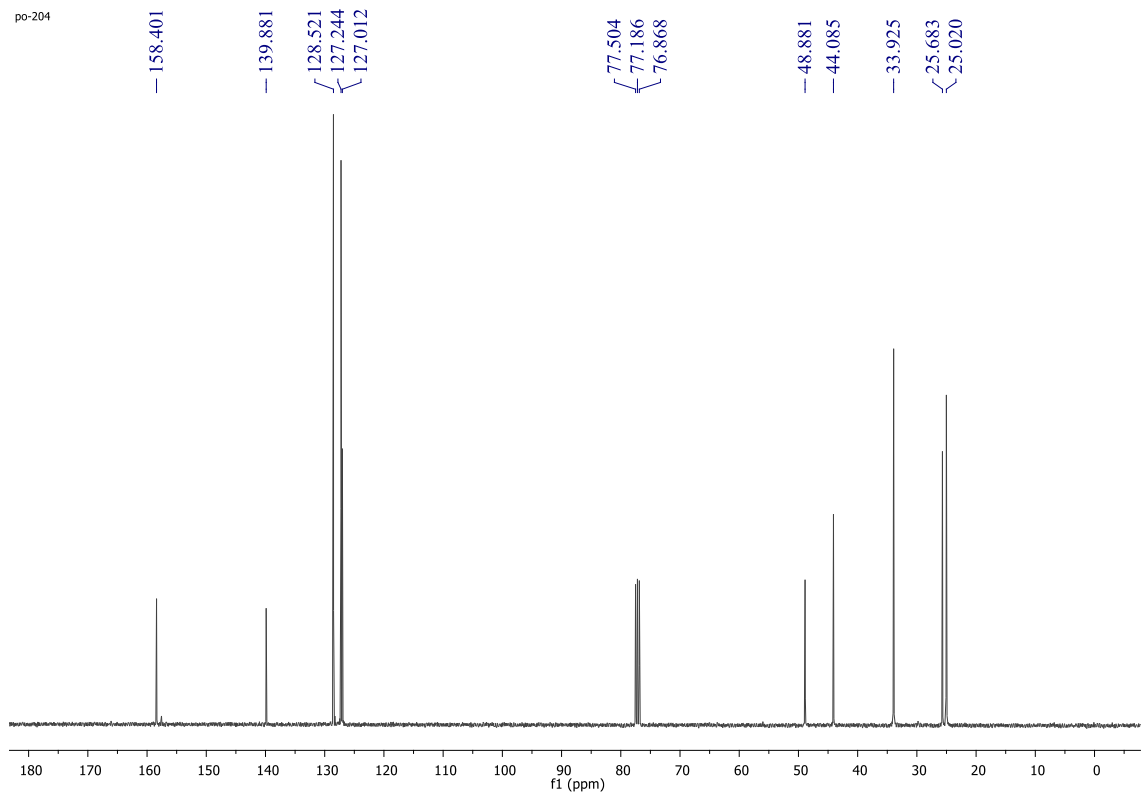

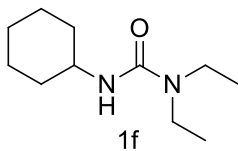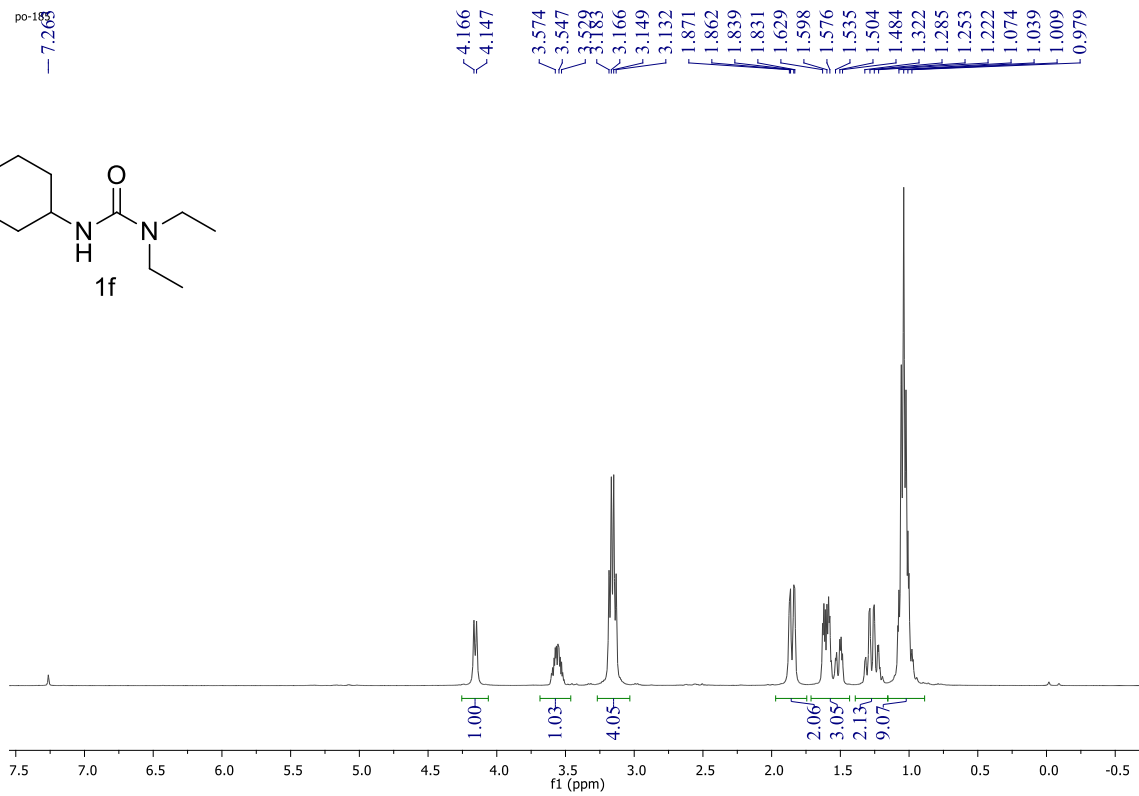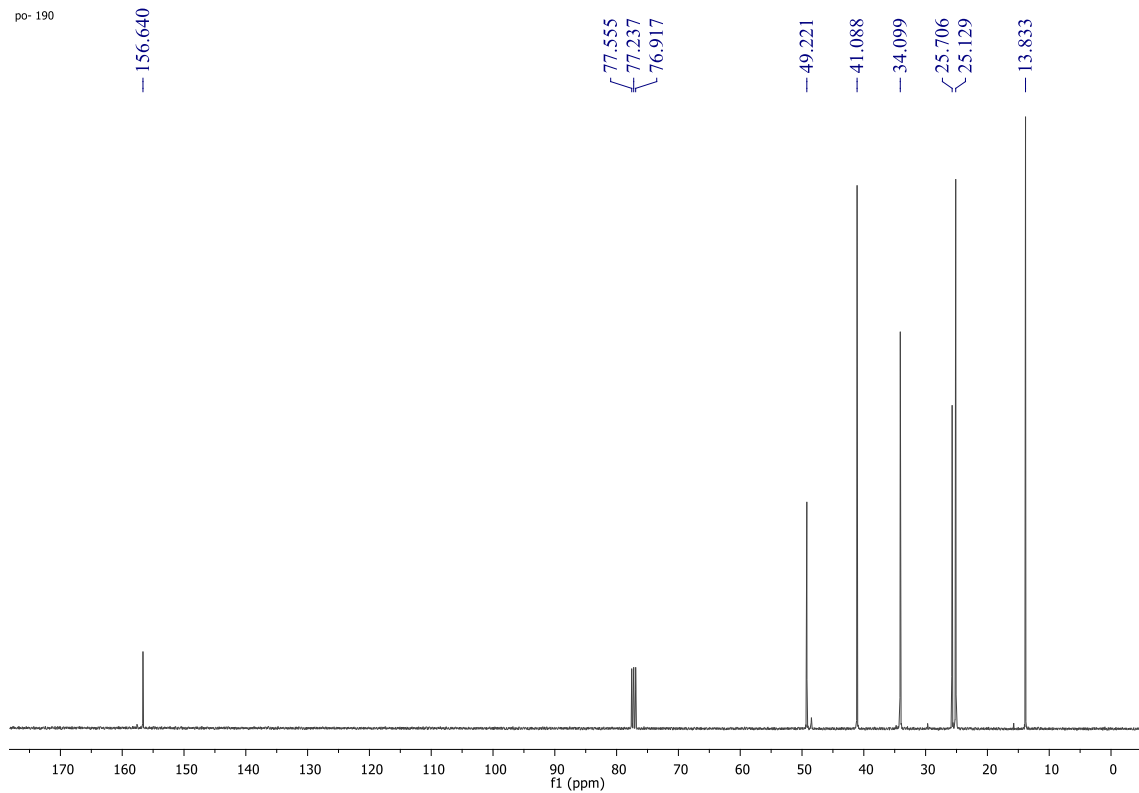

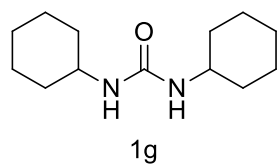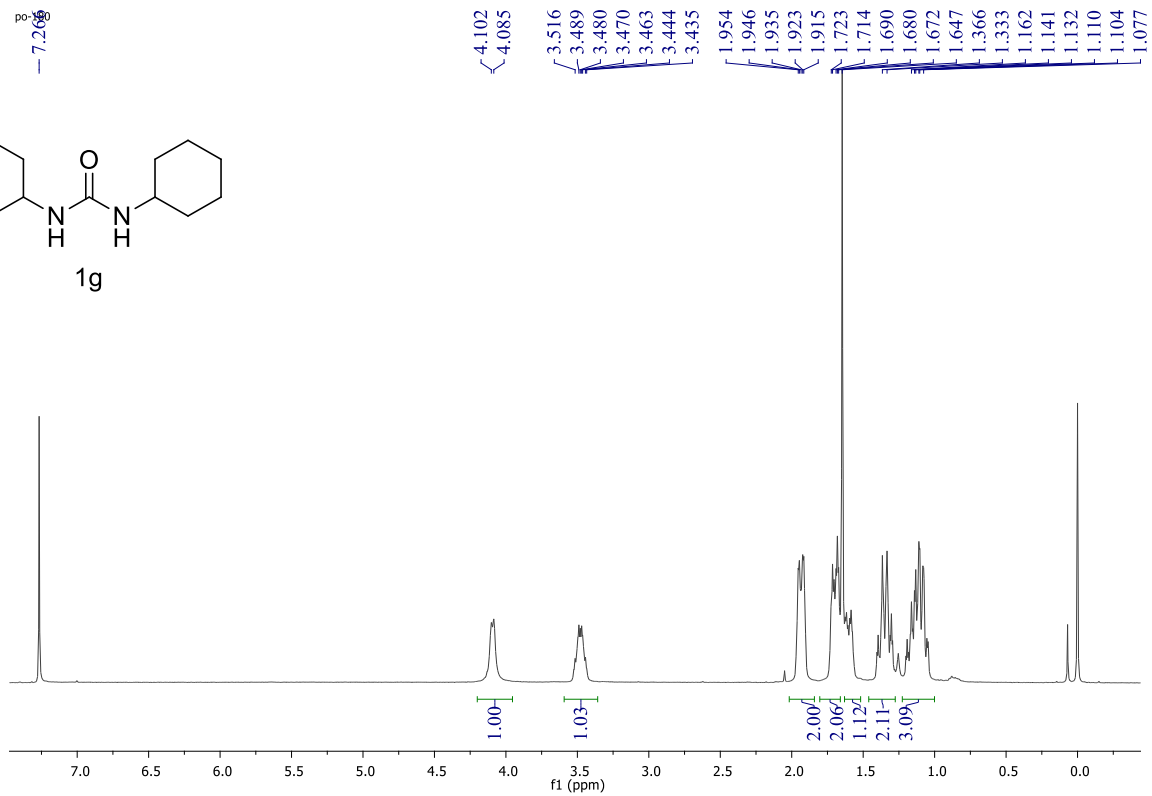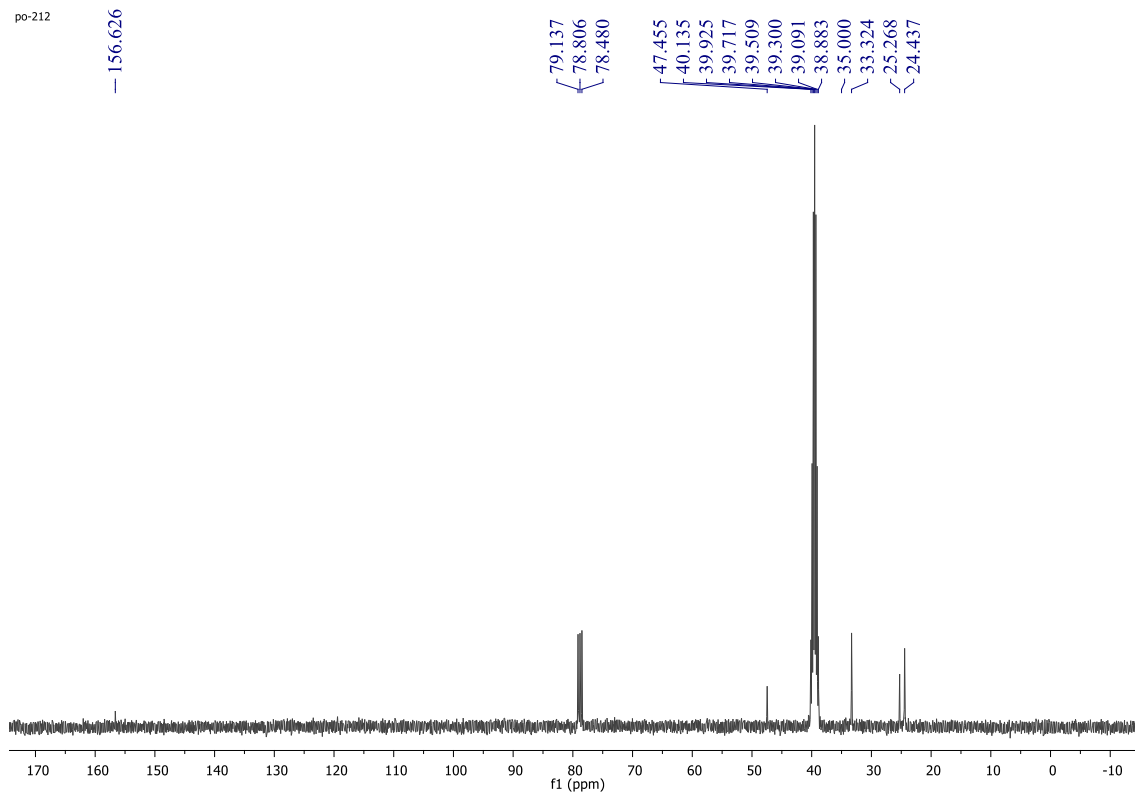

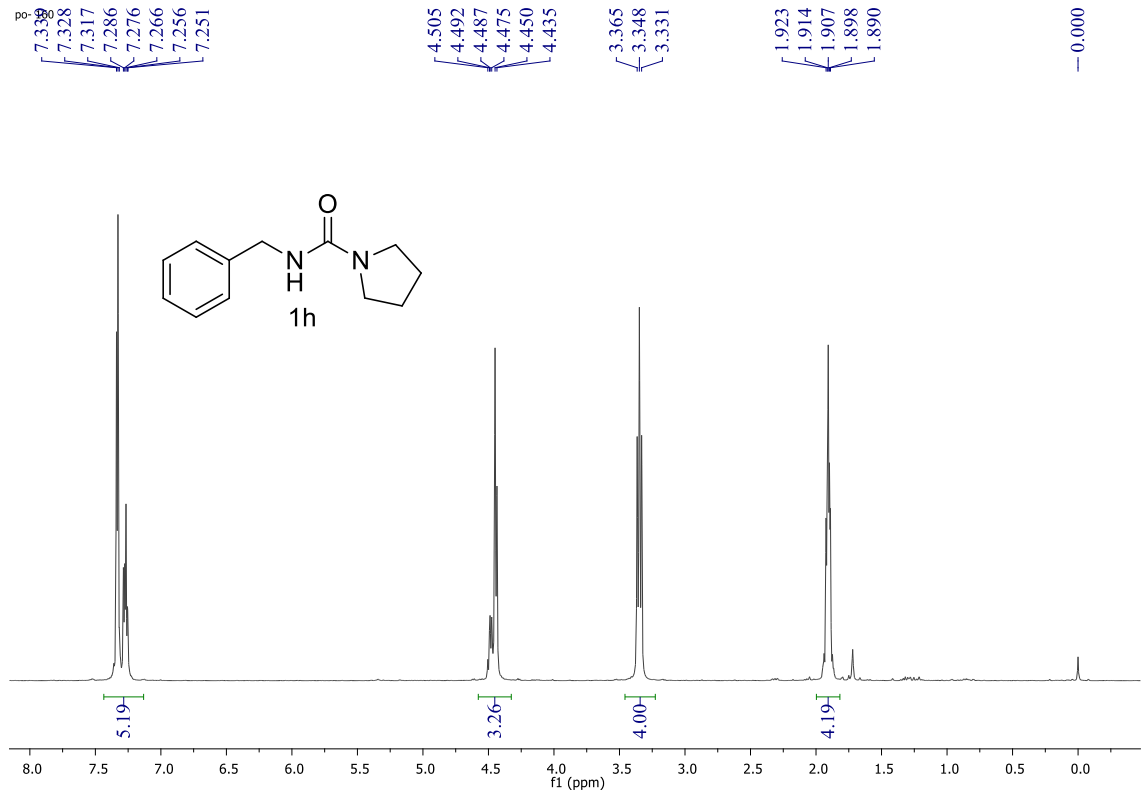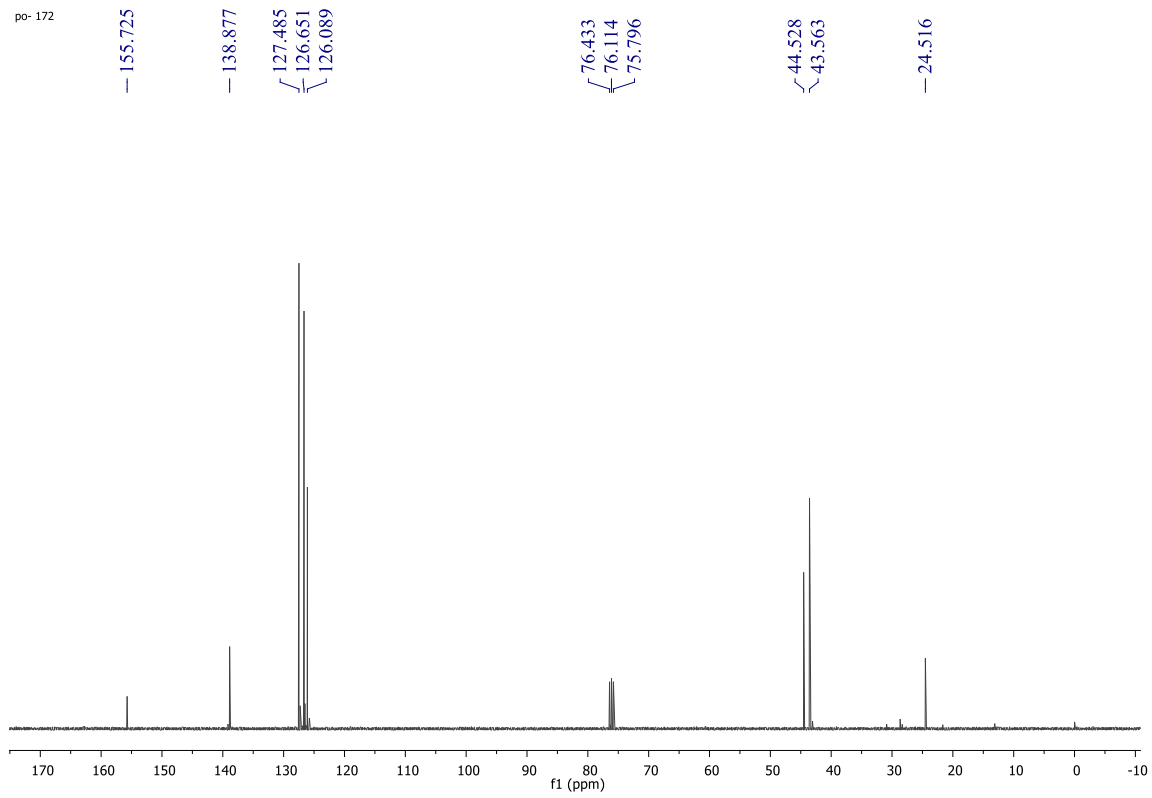

PO- 156

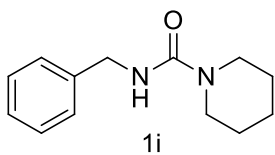

7.256  
7.240  
7.226  
7.203  
7.190  
7.181  
7.172

4.684  
4.354  
4.341

3.275  
3.262  
3.249

1.526  
1.515  
1.500  
1.485  
1.471  
1.458

-0.001

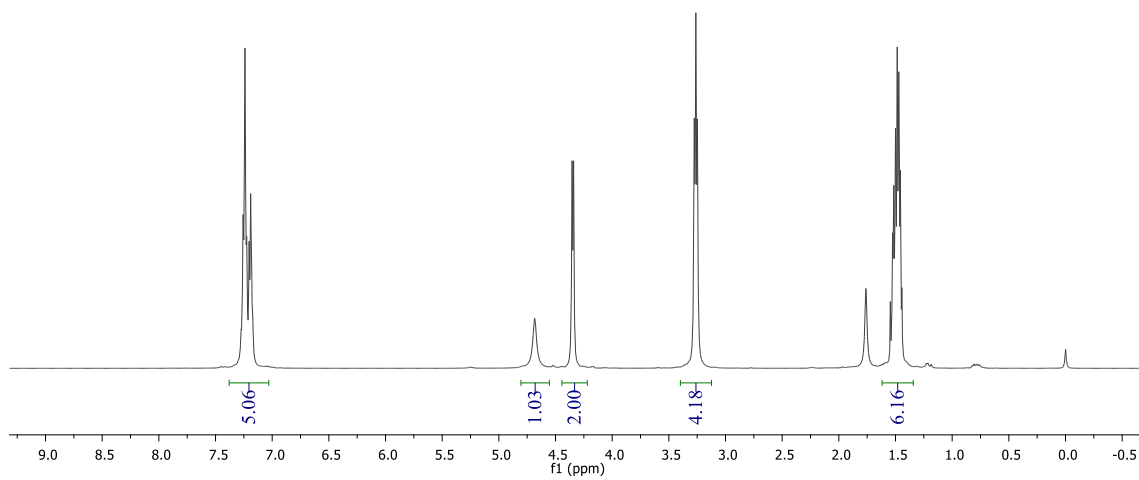

PO- 167

157.519

139.665

128.409

127.566

127.011

77.331

77.013

76.695

44.792

25.508

24.296

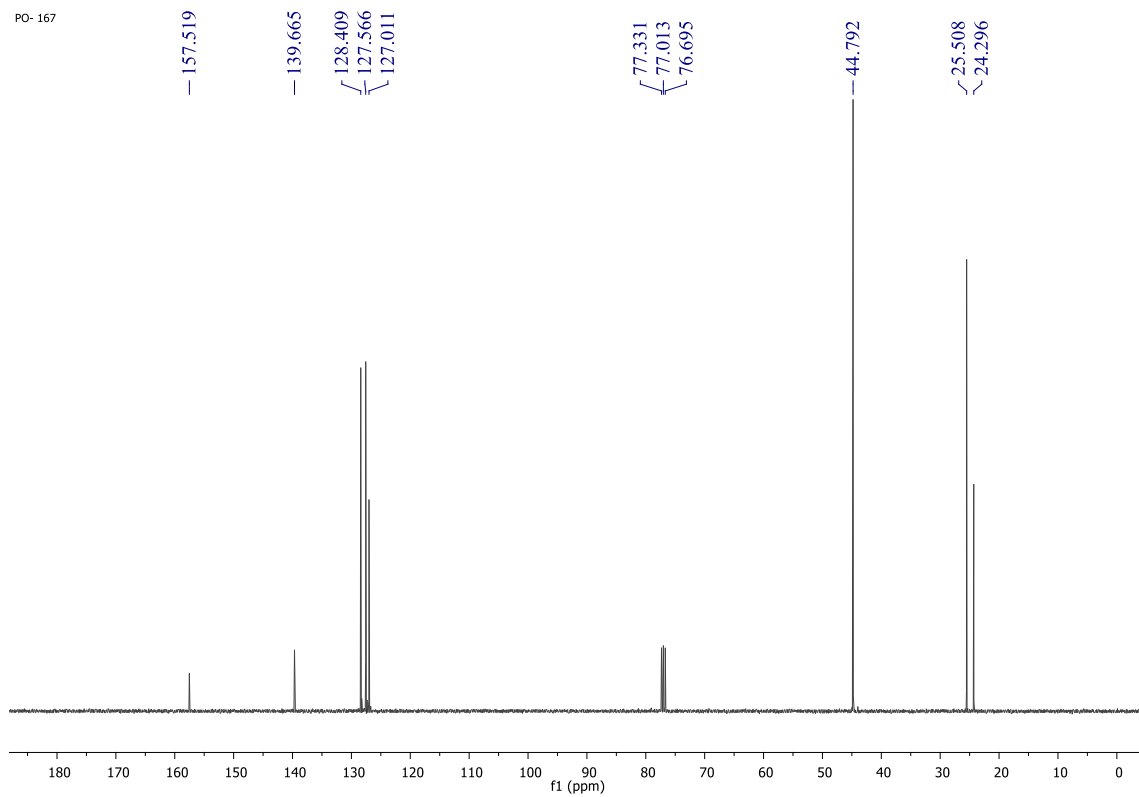

PO- 155

7.365  
7.346  
7.328  
7.305  
7.282  
7.266

-4.749  
-4.446  
3.707  
3.697  
3.687  
3.382  
3.371  
3.361

-0.000

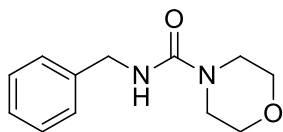

1j

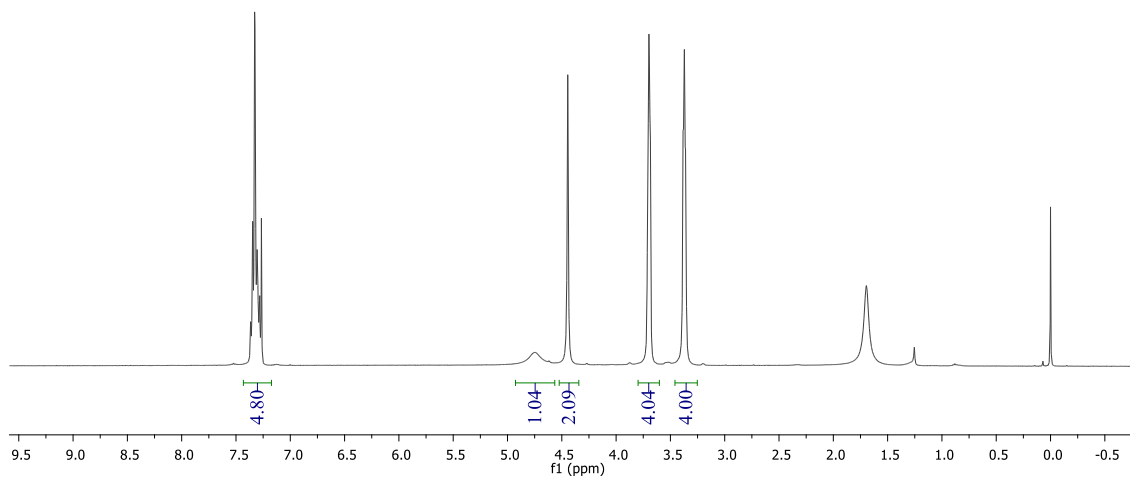

GR- 70

-157.832

-139.341

128.602

127.618

127.304

77.466

77.148

76.829

-66.472

44.819

43.983

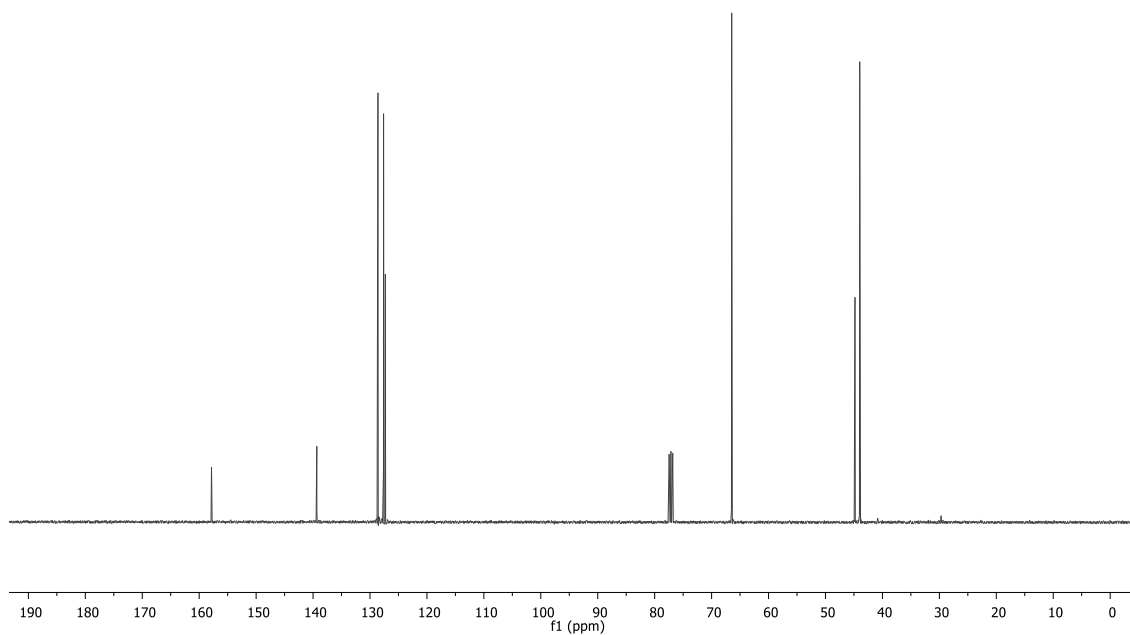

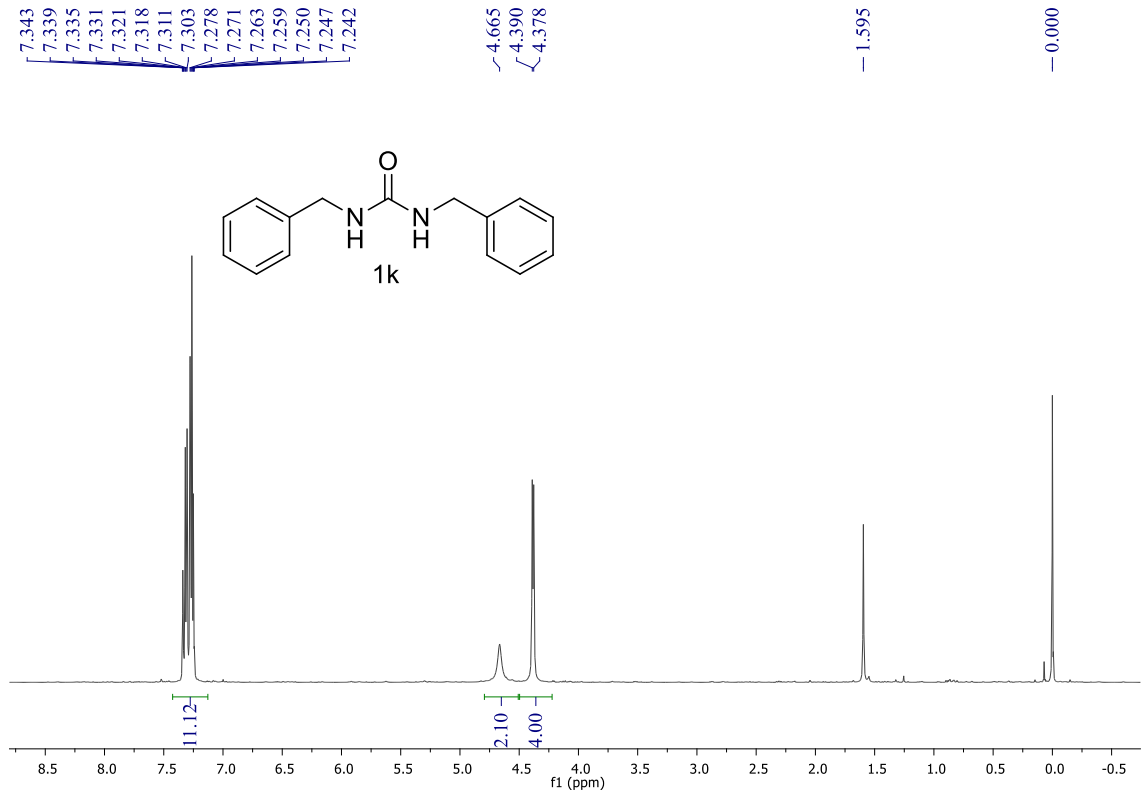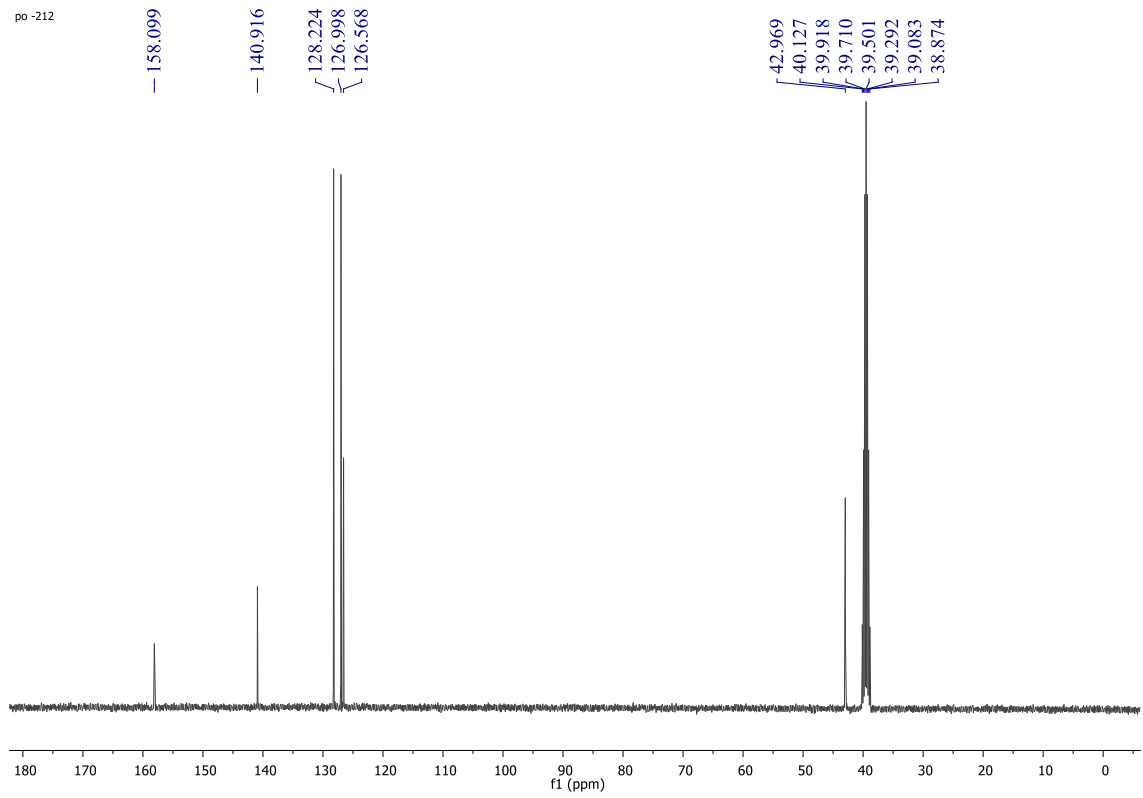

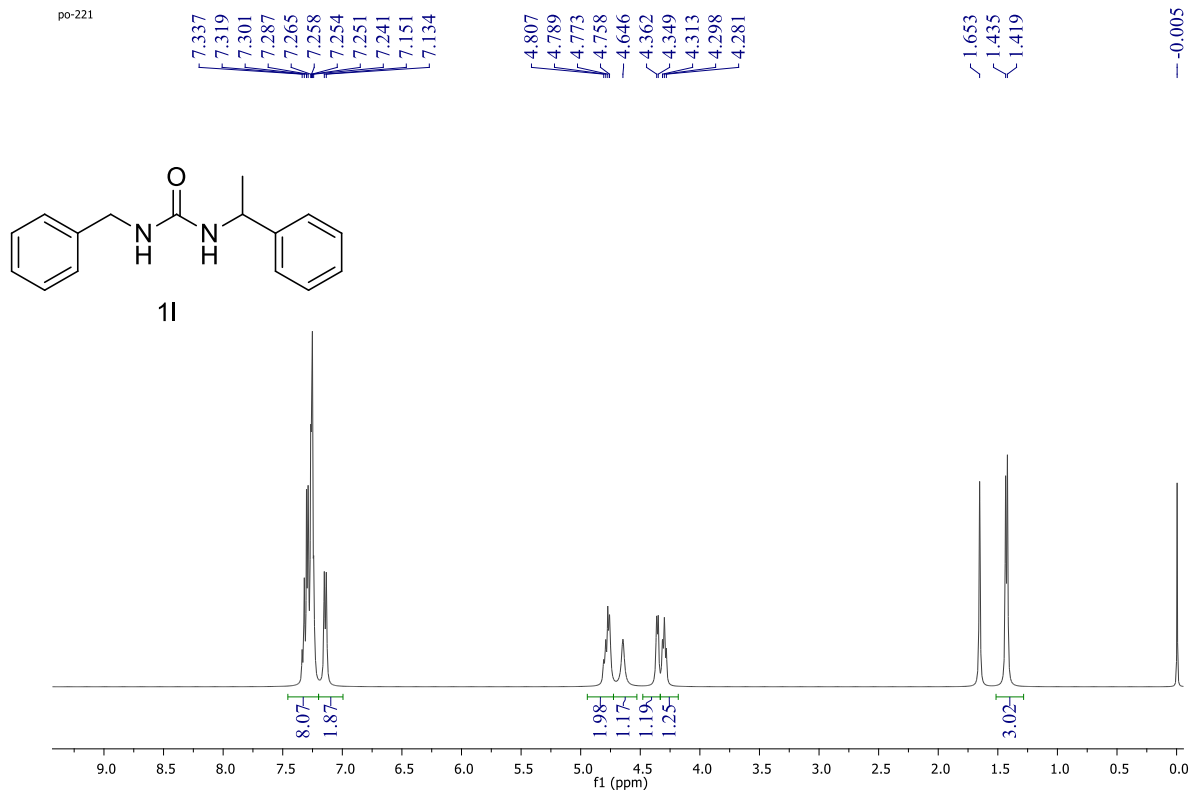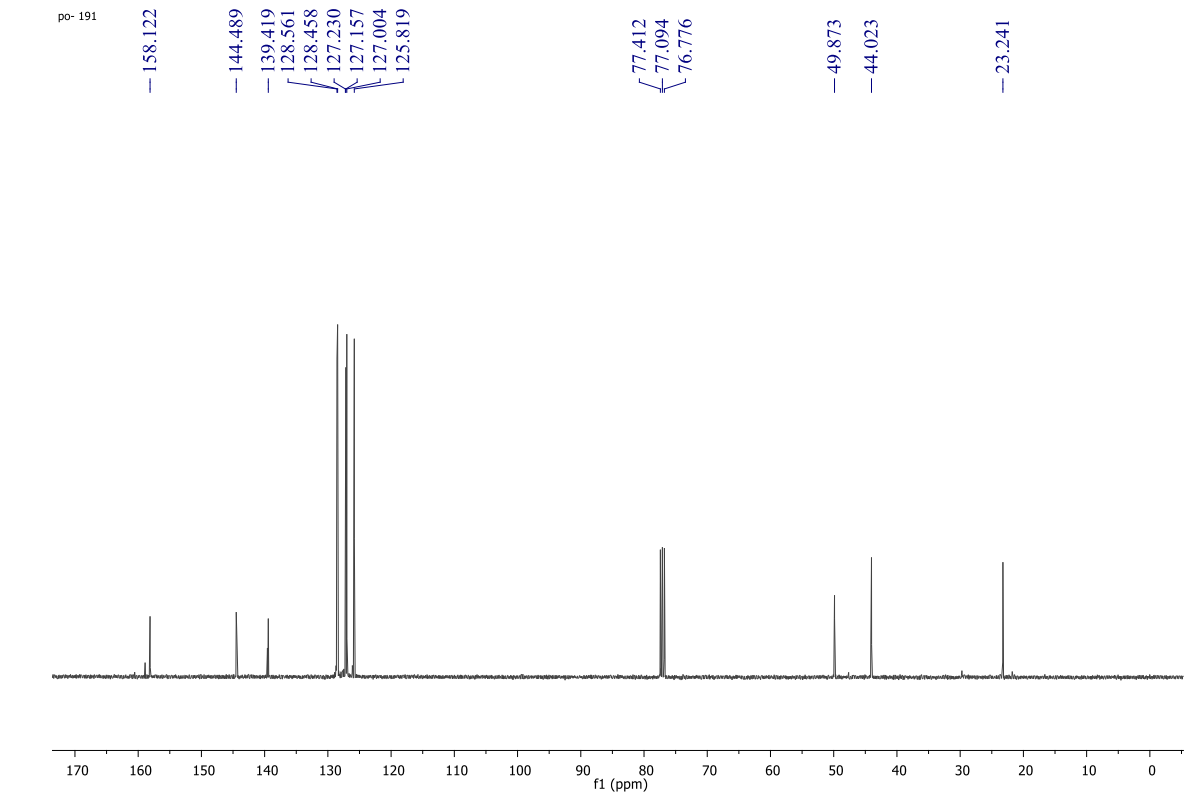



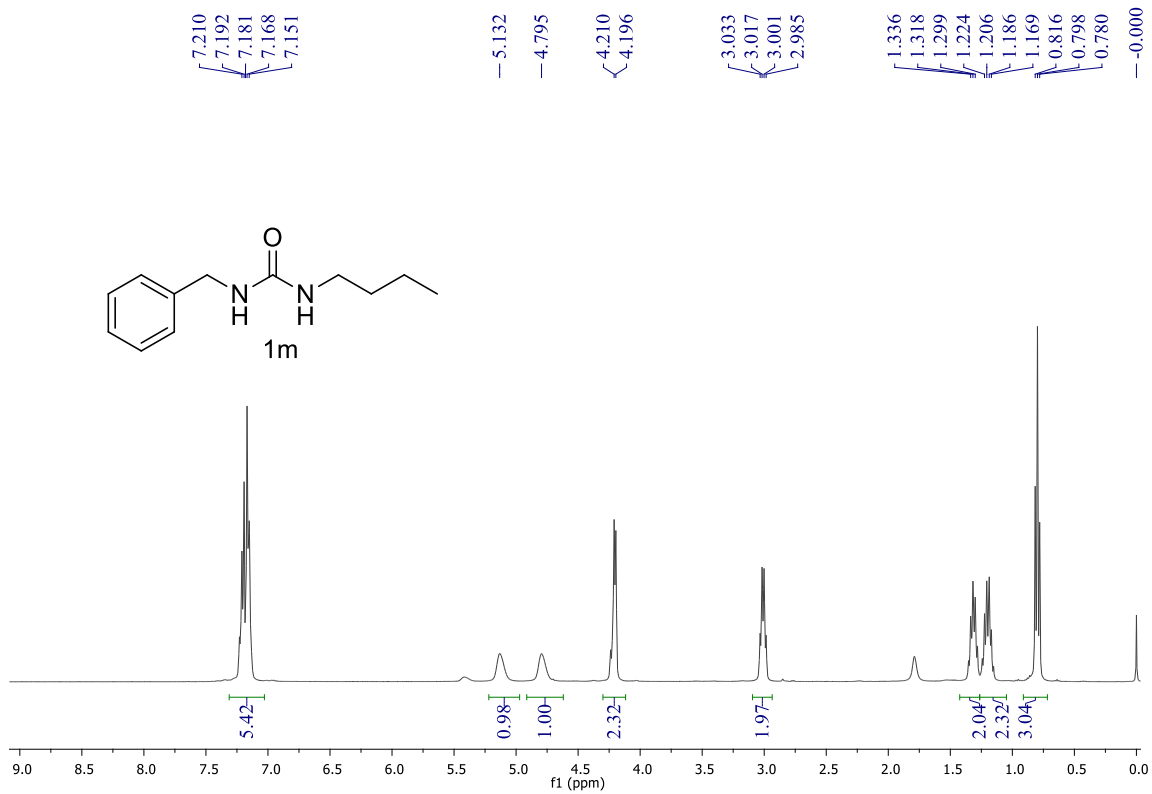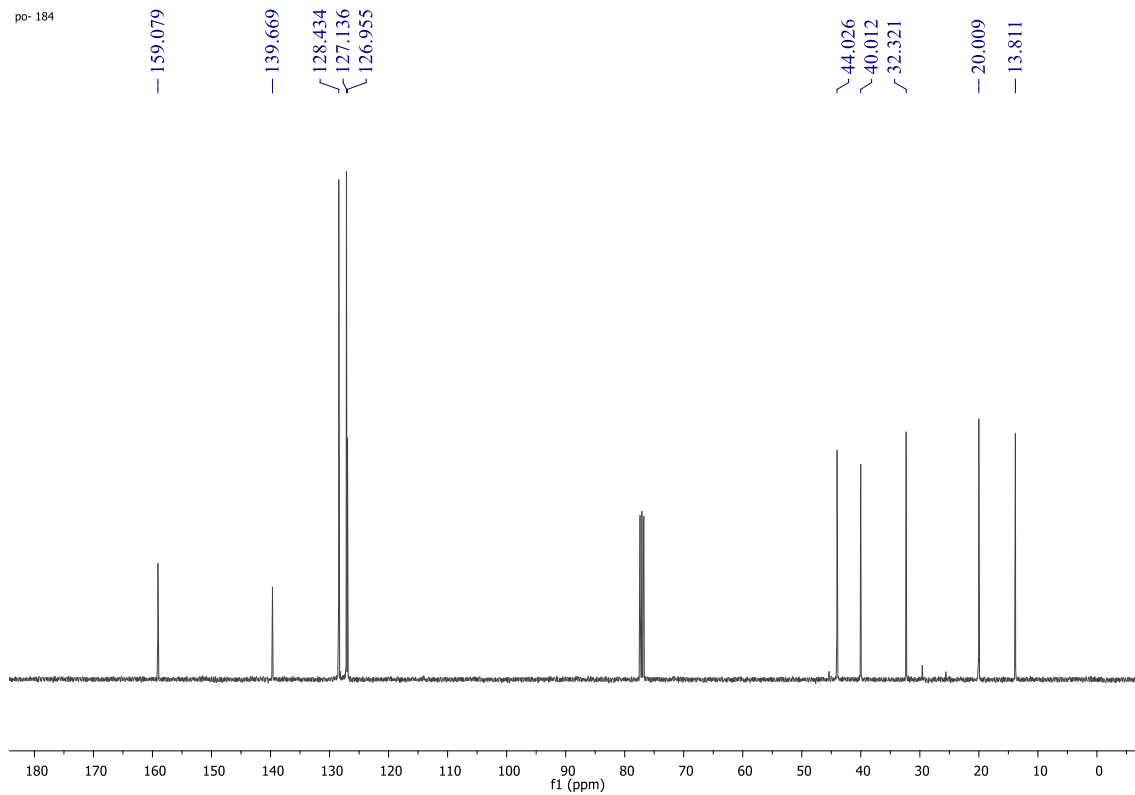

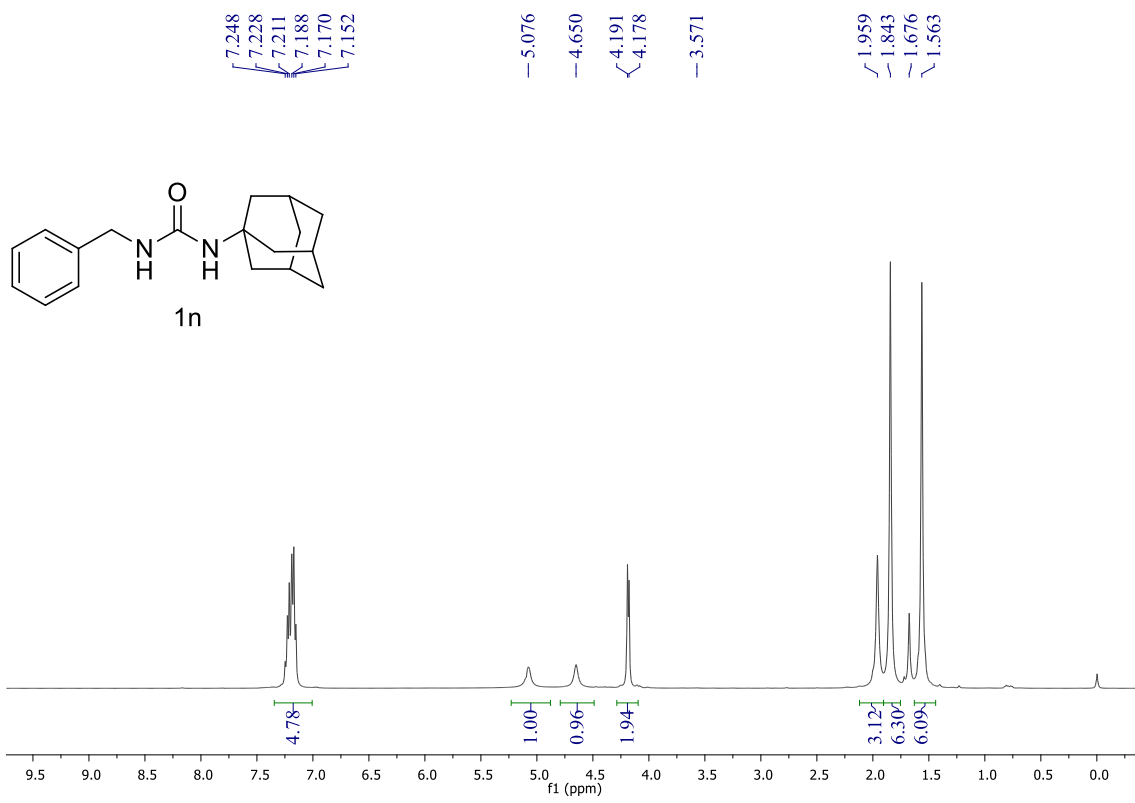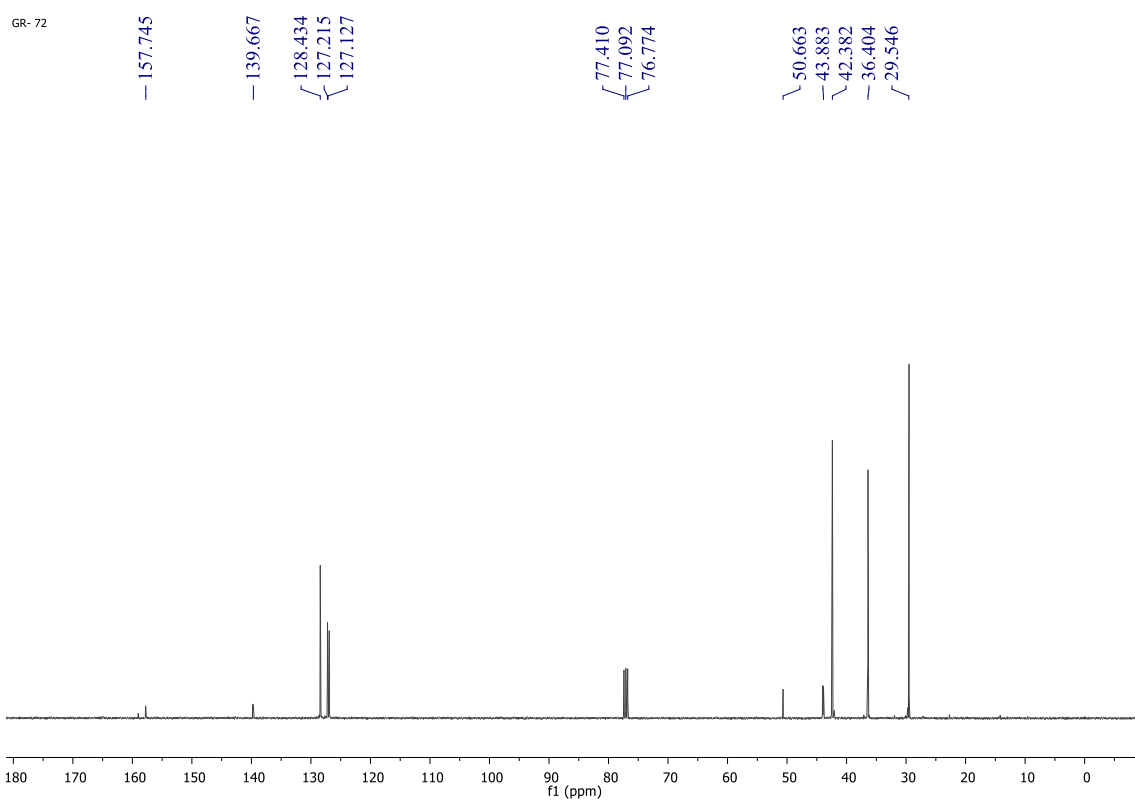

pp- 175

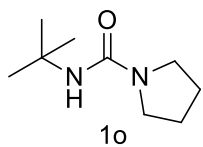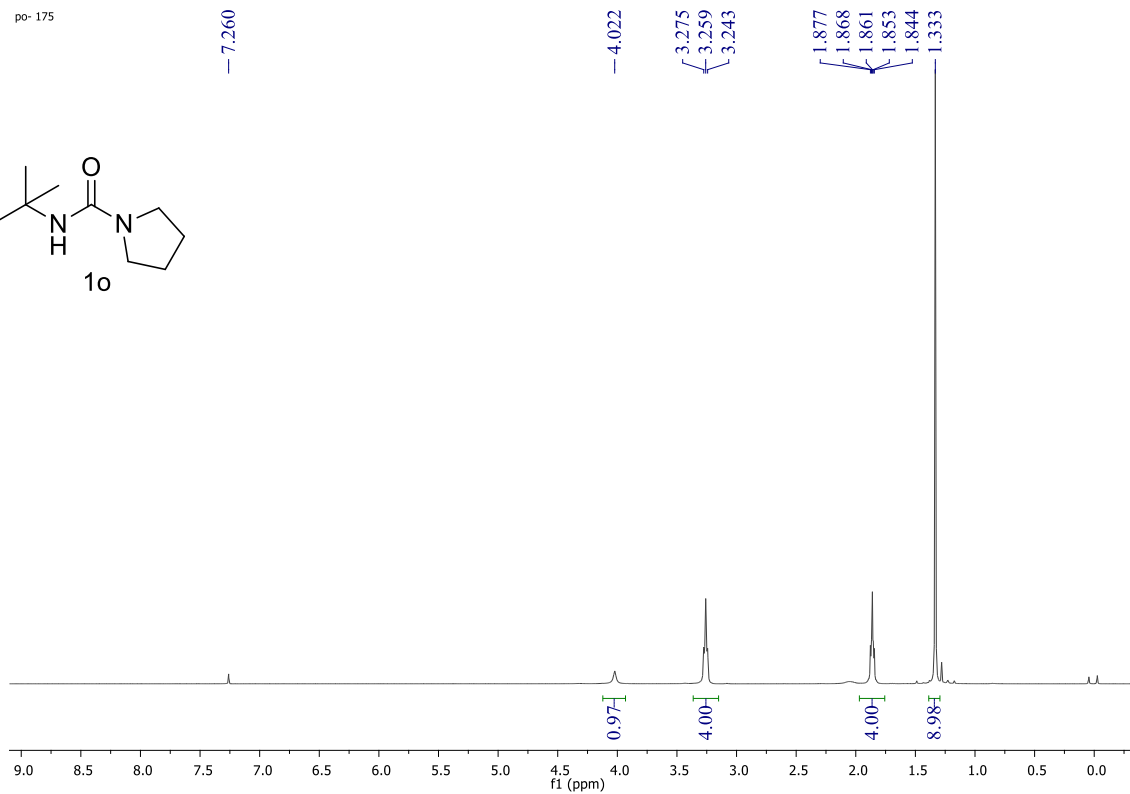

pp- 183

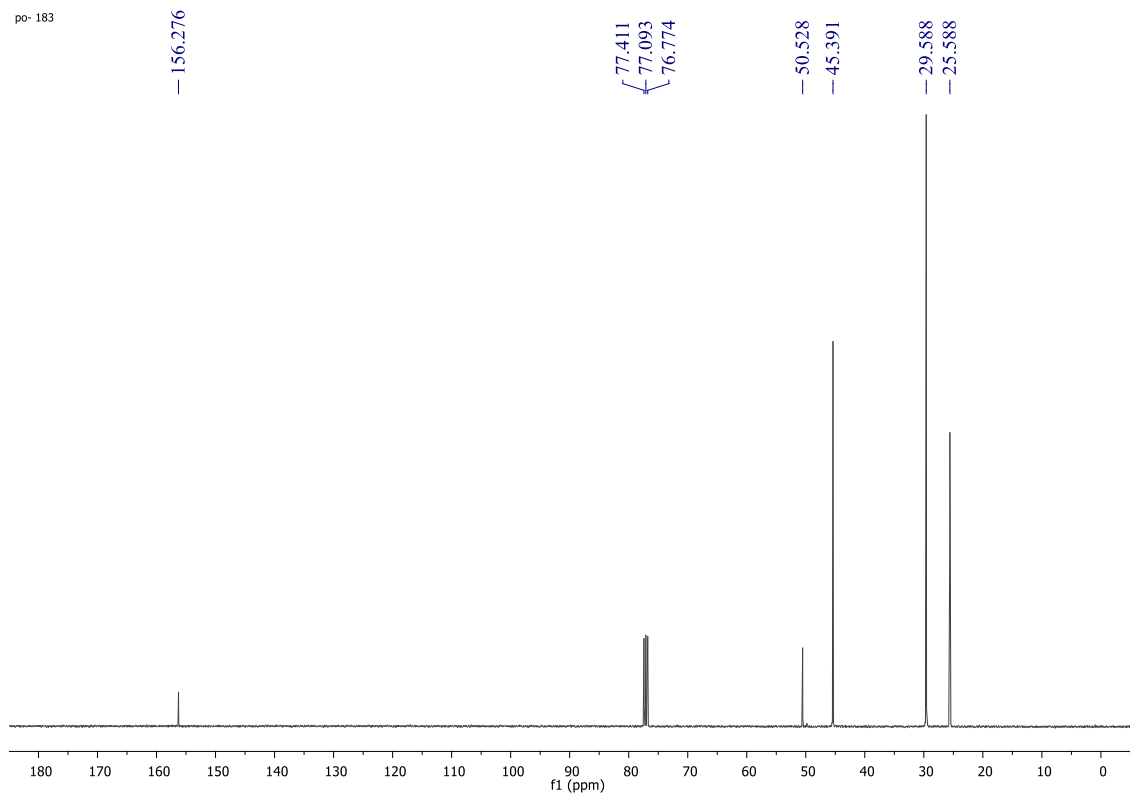

po-220

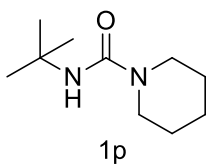

7.260

4.289

3.267  
3.253  
3.245

1.693  
1.544  
1.526  
1.519  
1.337

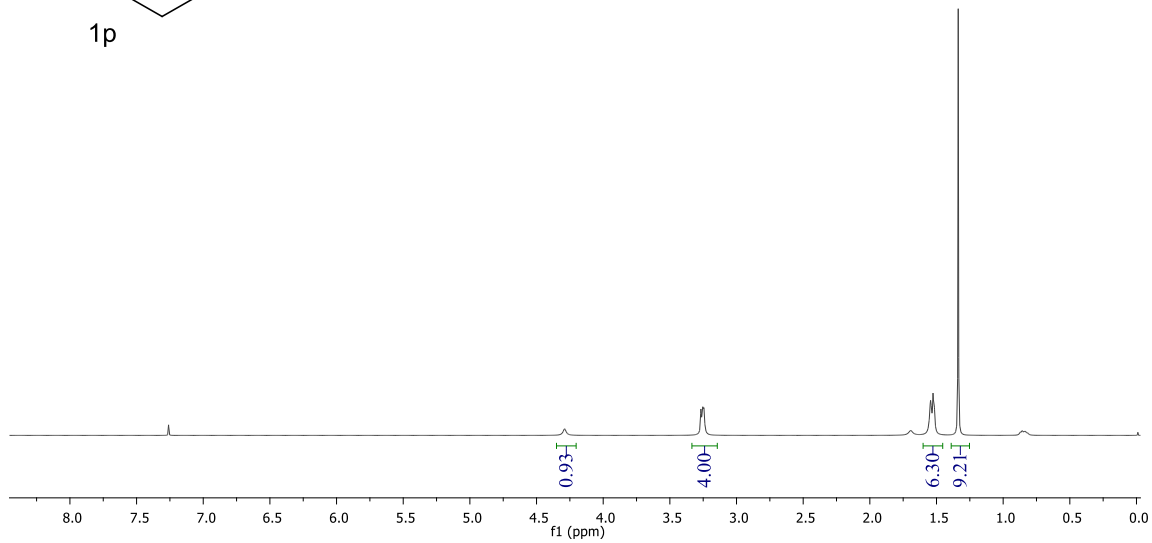

po-223

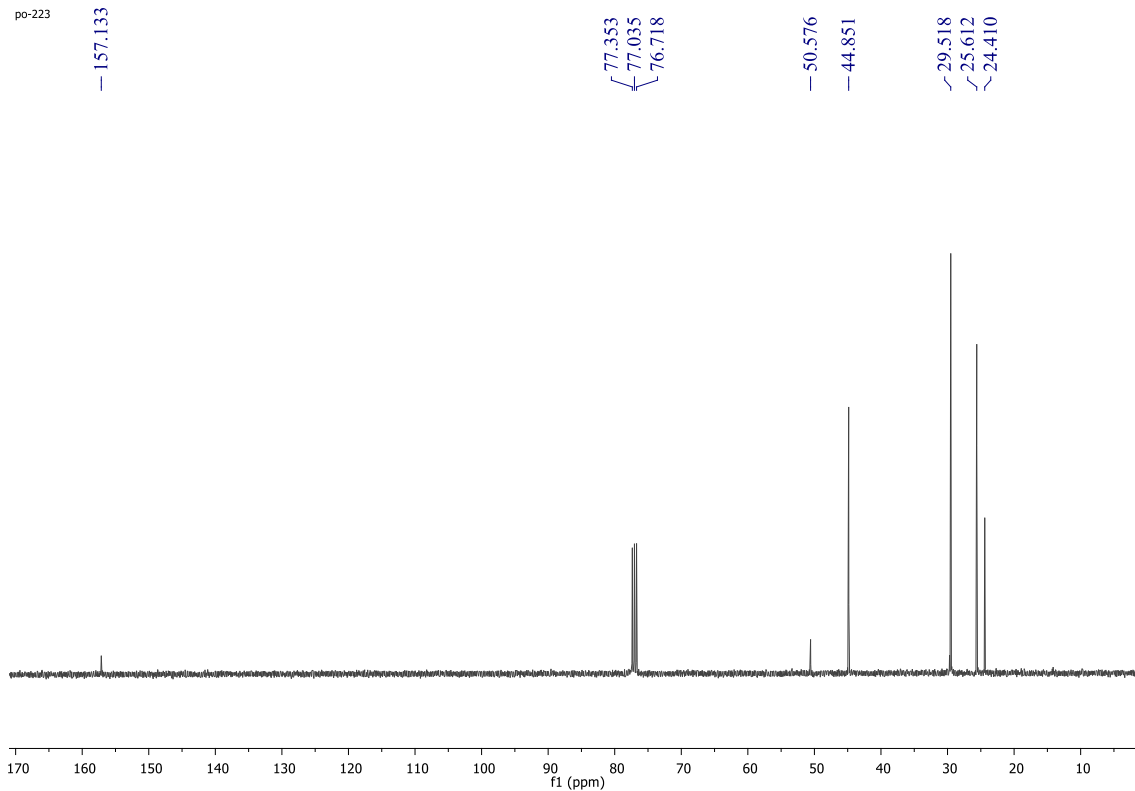

157.133

77.353  
77.035  
76.718

50.576  
44.851

29.518  
25.612  
24.410

po-176

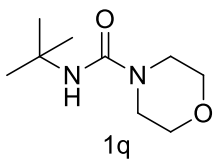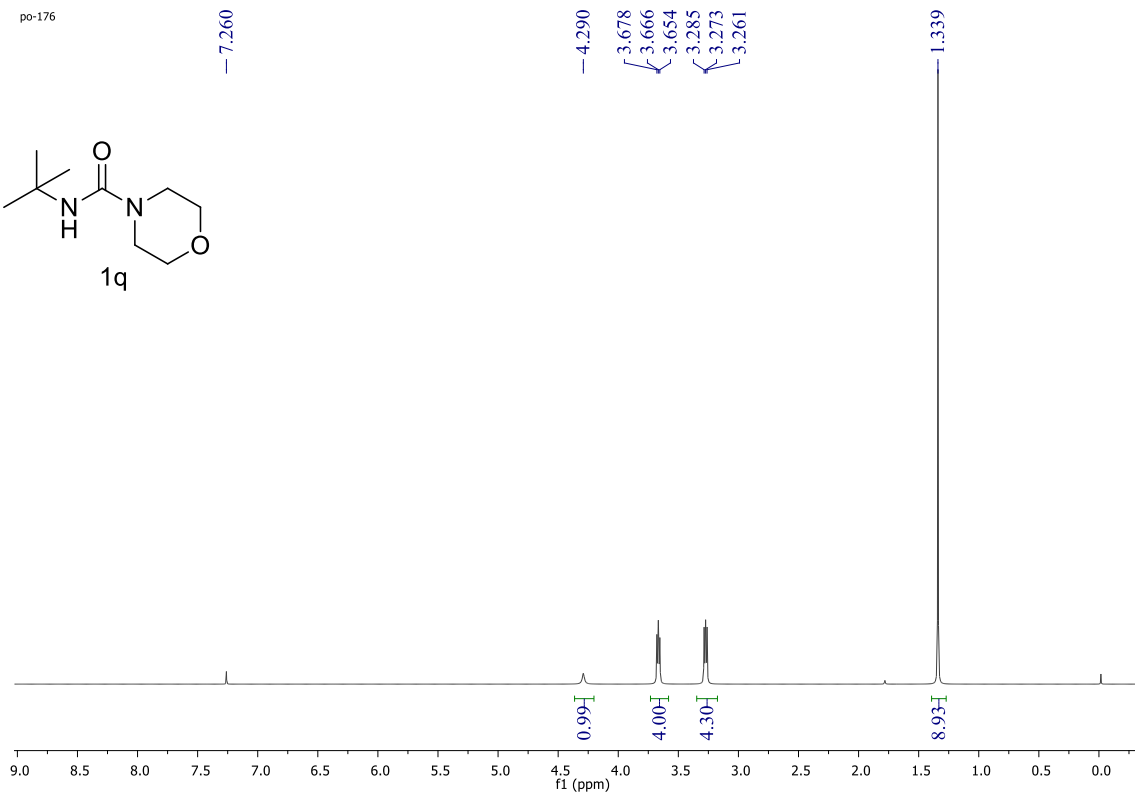

po-175

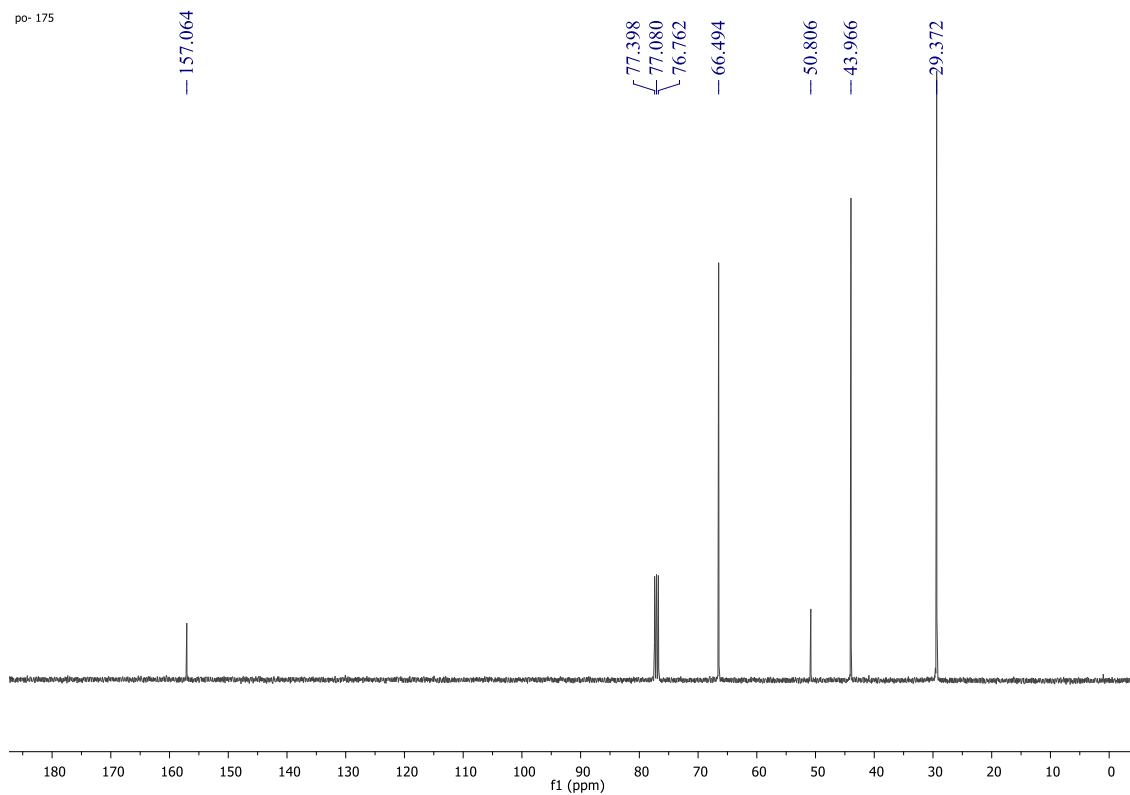

po-181

7.306  
7.288  
7.270  
7.263  
7.246  
7.229

4.945

4.634

4.259

1.291

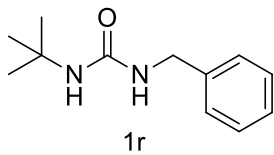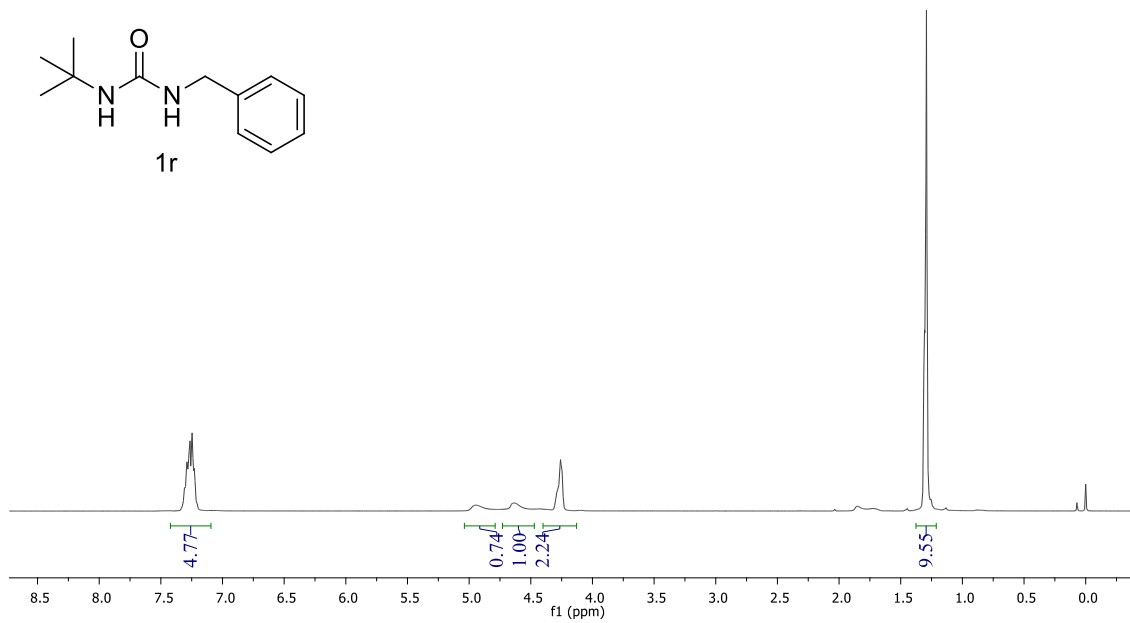

PO-181  
158.212

139.905

128.375

127.175

126.822

77.399

77.082

76.761

49.996

43.738

29.518

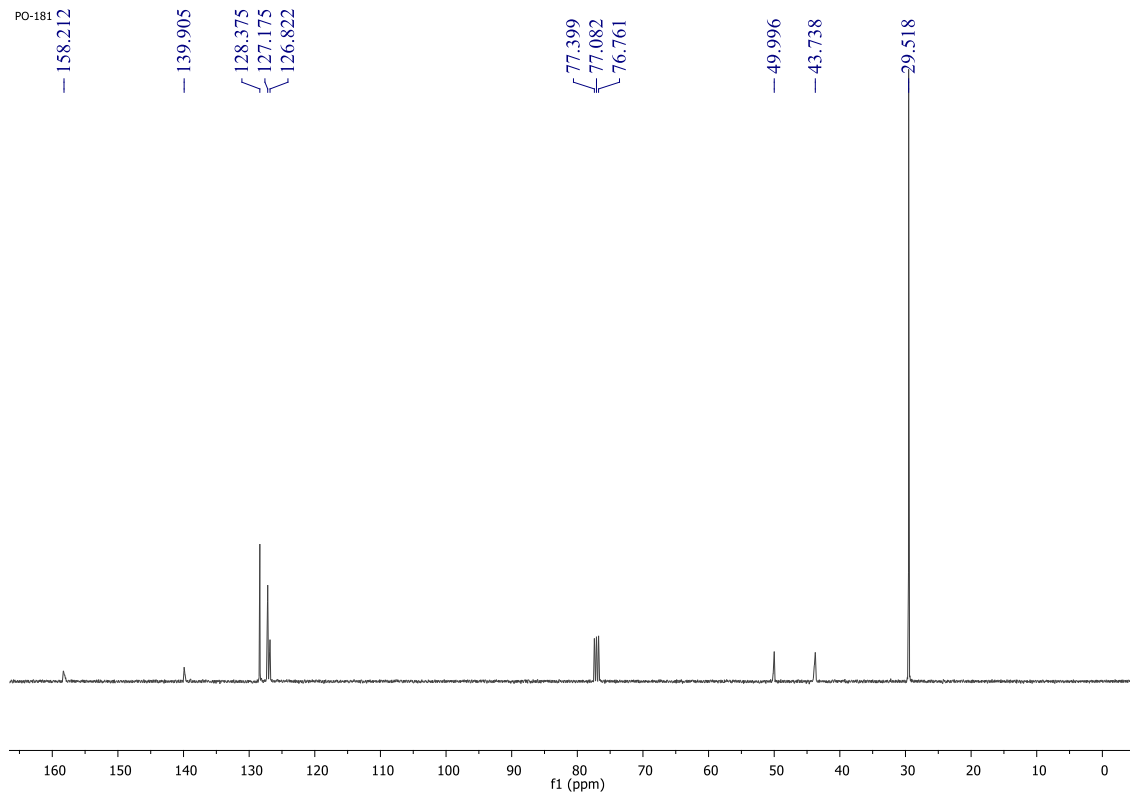

7.618  
7.163  
7.144  
7.126  
7.012  
6.993  
6.974  
6.964  
6.715  
6.697  
6.678  
5.421  
3.412  
3.400  
3.390  
3.390  
2.505  
1.720  
1.711  
1.689  
1.679  
1.667  
1.493  
1.483  
1.472  
1.460  
1.449  
1.439  
1.428  
1.377  
1.366  
1.355  
1.345  
1.334  
1.175  
1.166  
1.156  
1.146  
1.137  
1.114  
1.105  
1.094  
1.085  
1.075  
0.958  
0.951  
0.927  
0.904  
0.895  
0.875

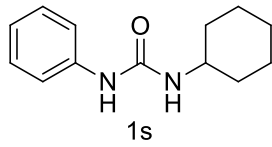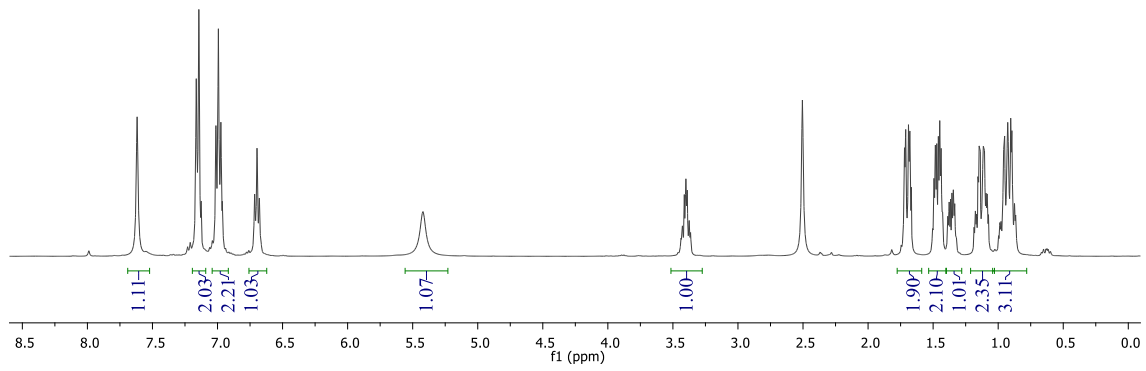

po-217

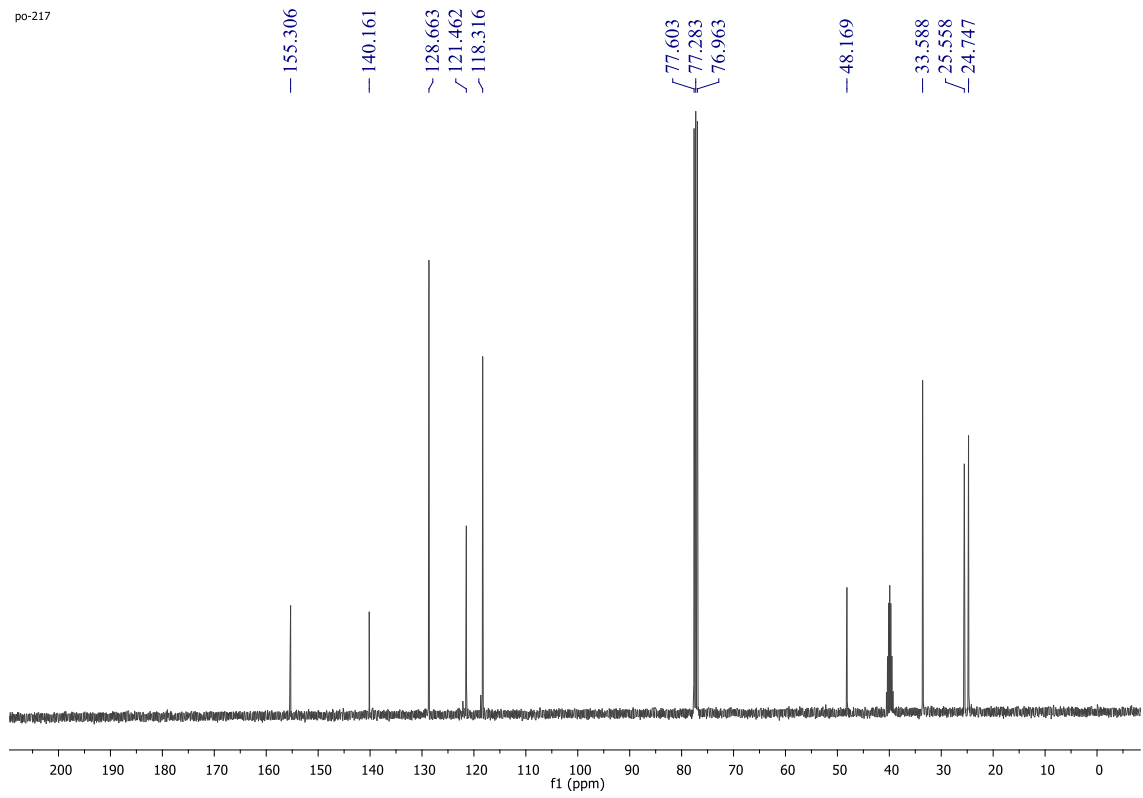

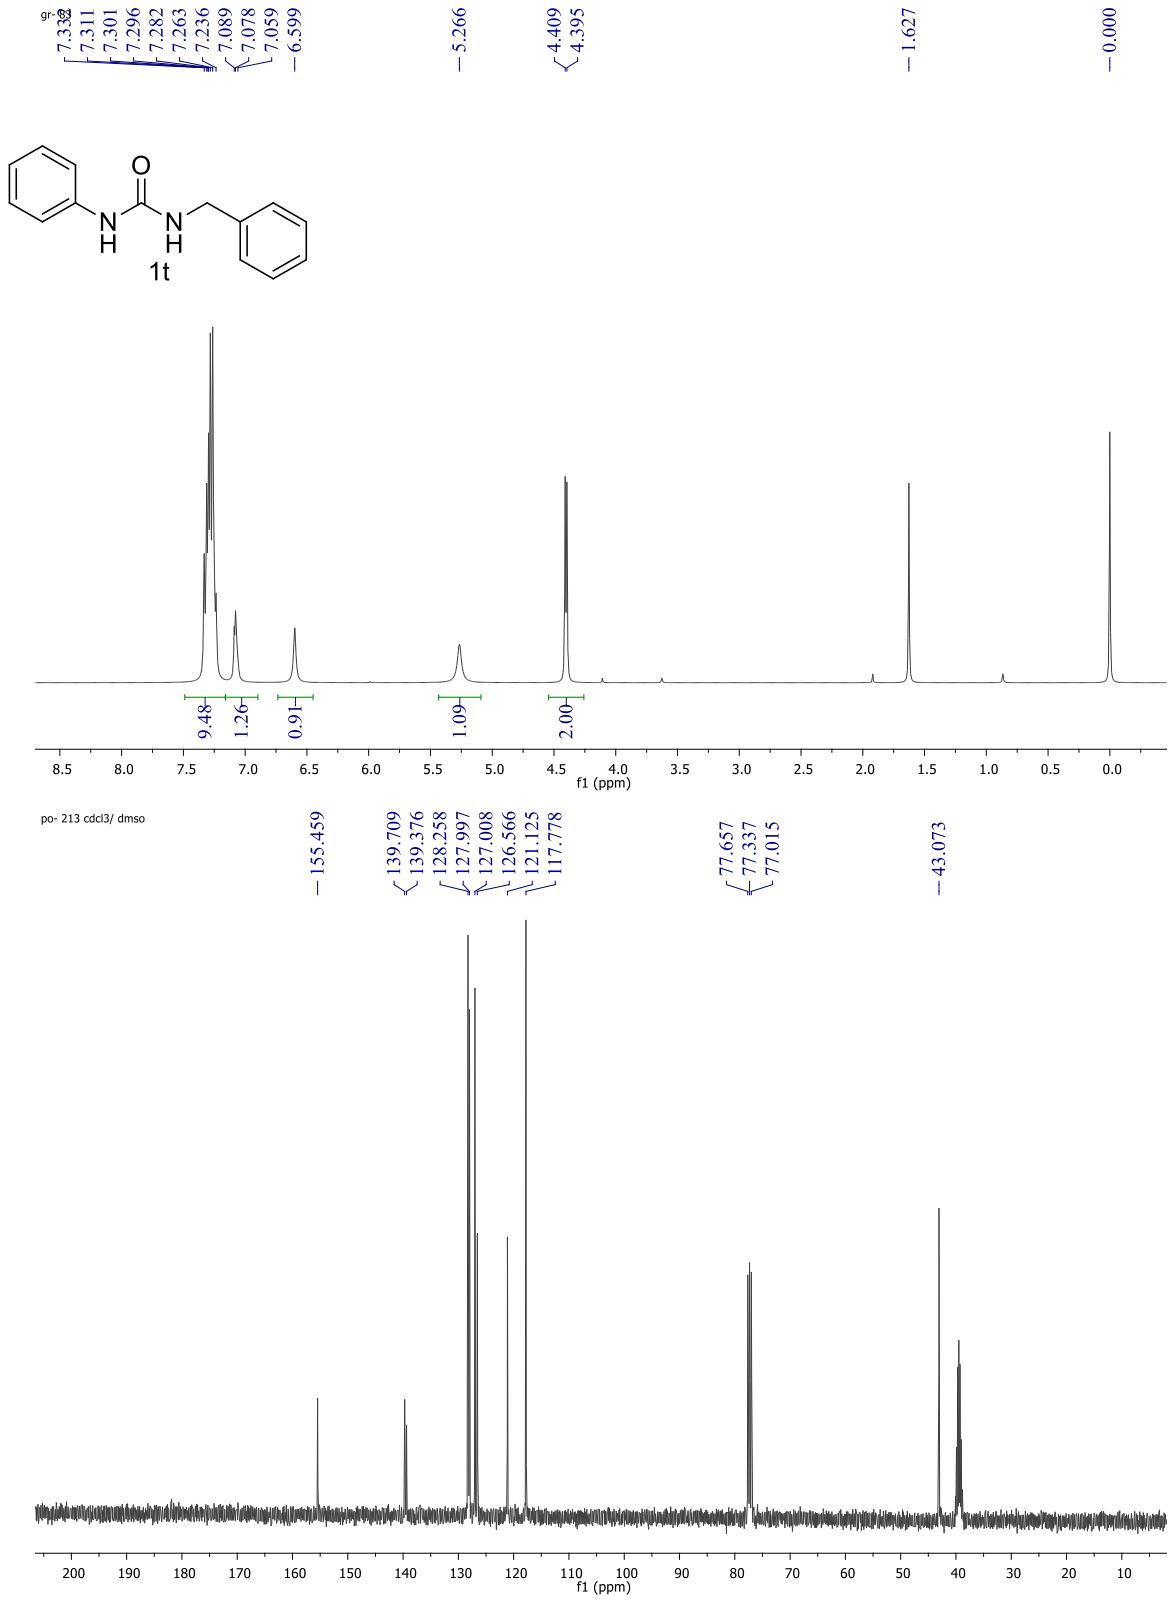



po-302

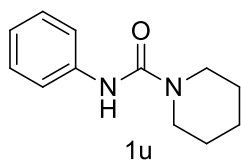

7.368  
7.348  
7.300  
7.281  
7.269  
7.262  
7.040  
7.022  
7.004  
6.389

3.465  
3.452  
3.440

1.677  
1.637  
1.626  
1.615  
1.604  
1.589

0.006

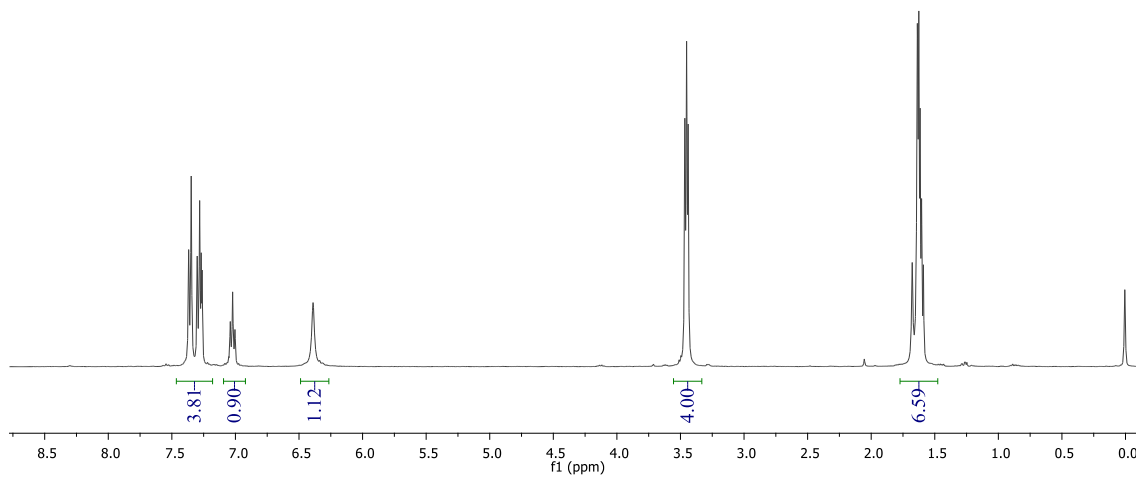

154.954

139.257

128.848

122.828

119.769

77.352

77.034

76.716

45.252

25.698

24.390

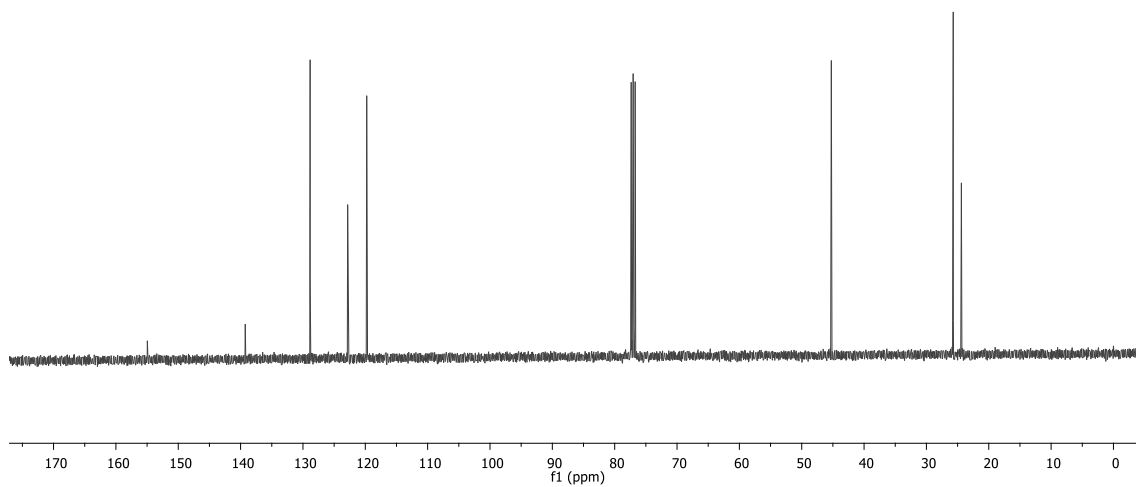

po-302

7.366  
7.362  
7.344  
7.341  
7.319  
7.314  
7.301  
7.279  
7.265  
7.076  
7.058  
7.040  
6.341

3.761  
3.749  
3.736  
3.498  
3.486  
3.474

1.608

-0.000

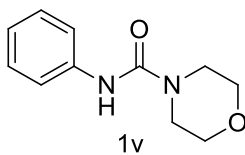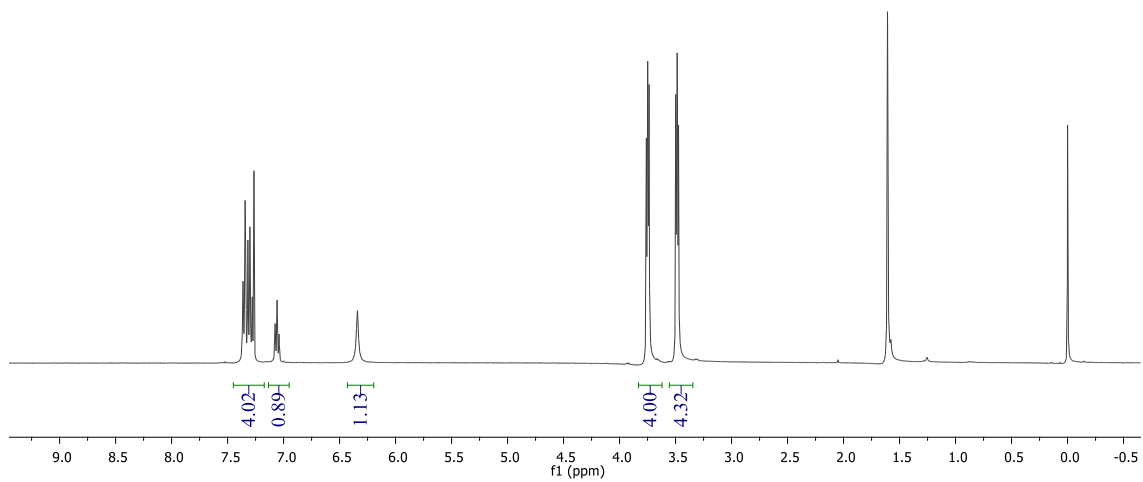

PO-312

155.114

138.654

128.952

123.380

120.046

77.345

77.027

76.709

66.493

44.237

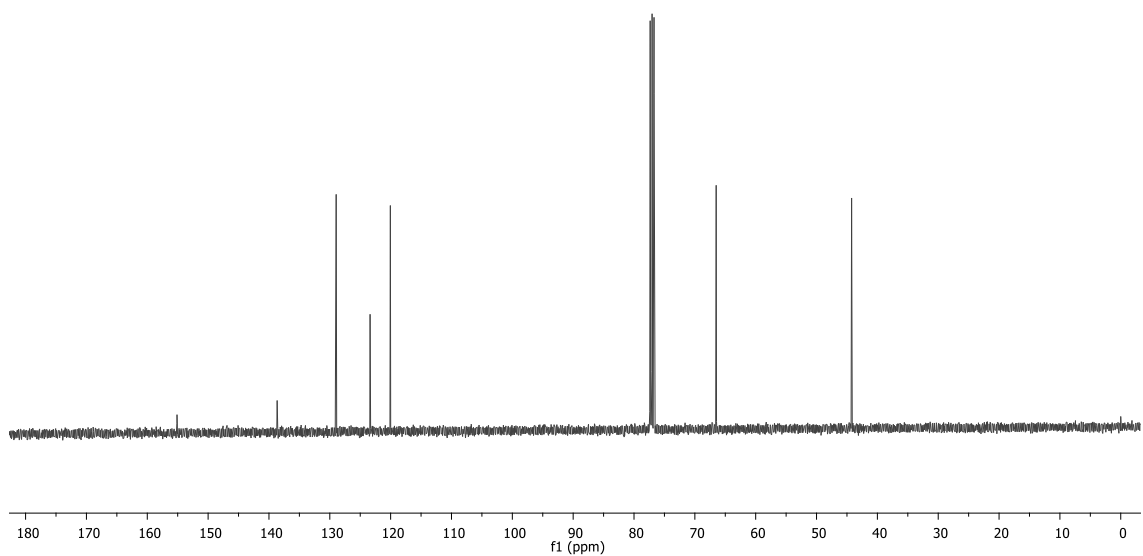

po-307

7.267  
7.237  
7.215  
6.839  
6.817  
— 6.428

3.775  
3.711  
3.700  
3.688  
3.444  
3.432  
3.421

— -0.003

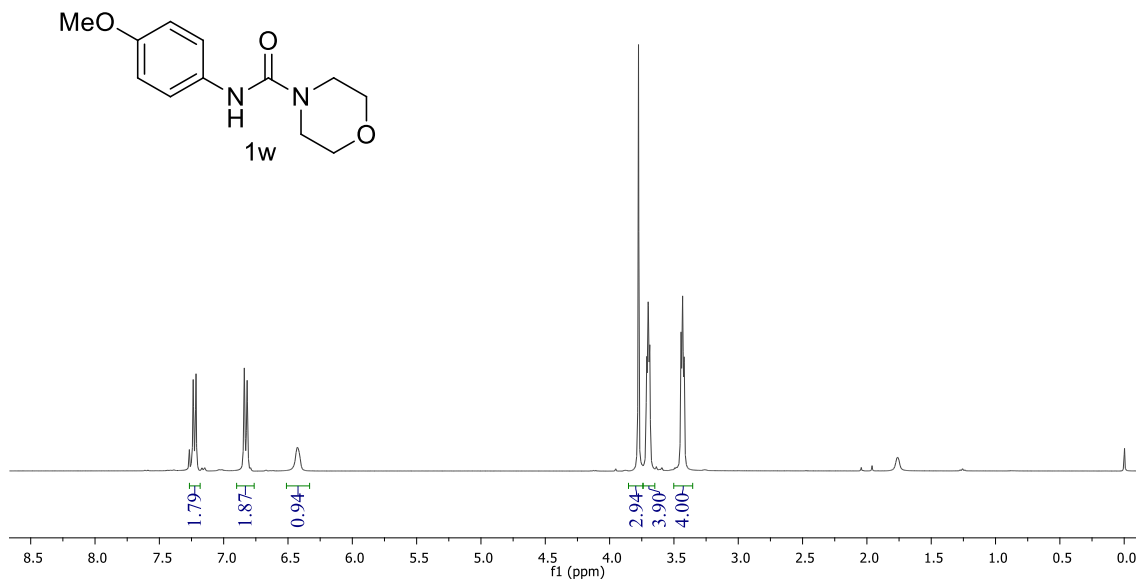

po-307

156.052  
155.741

— 131.615

— 122.671

— 114.099

77.367  
77.049  
76.732

— 66.499

— 55.494

— 44.186

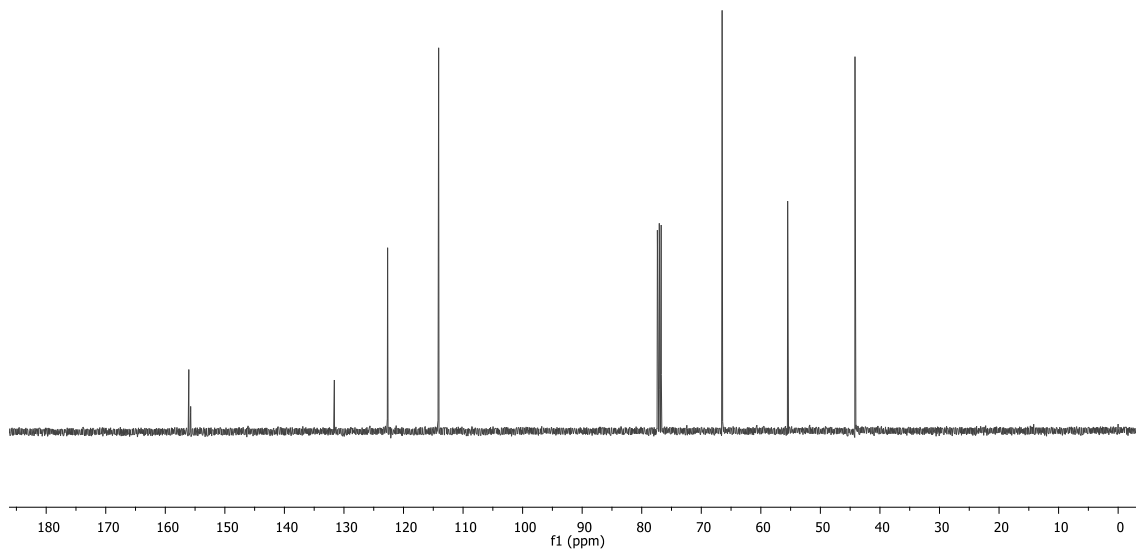

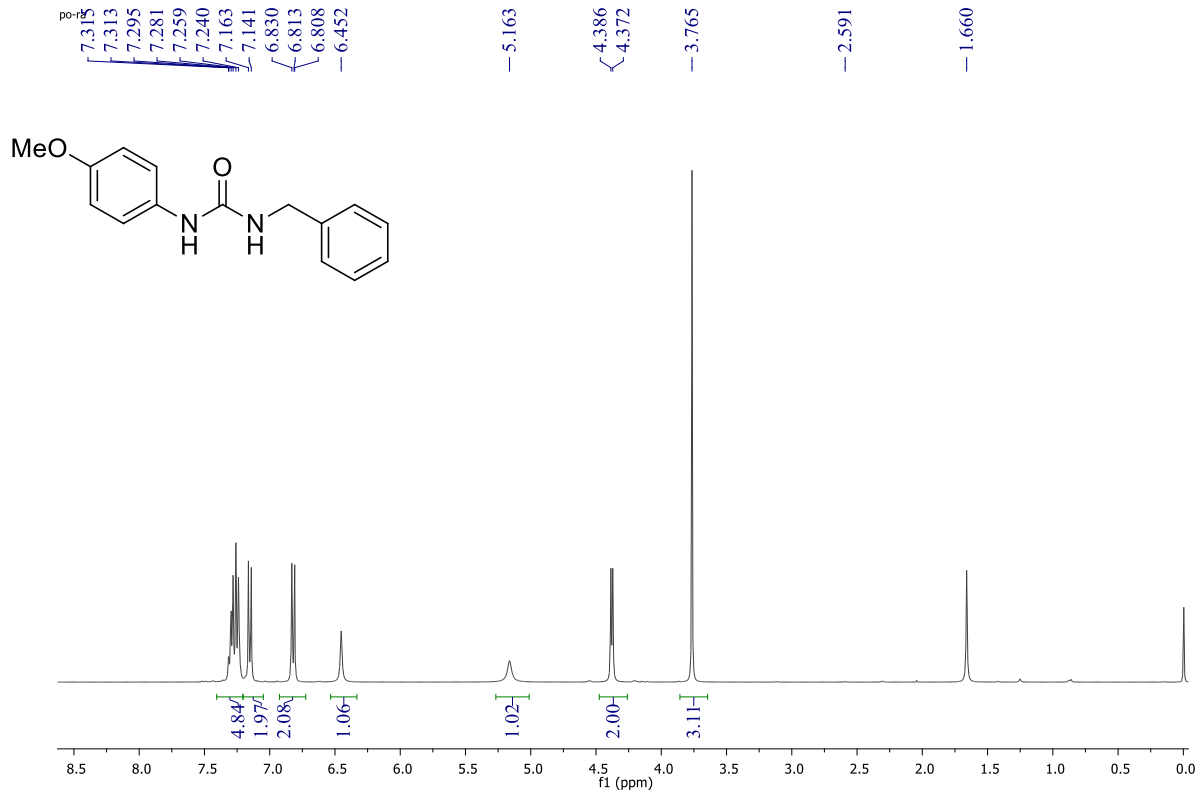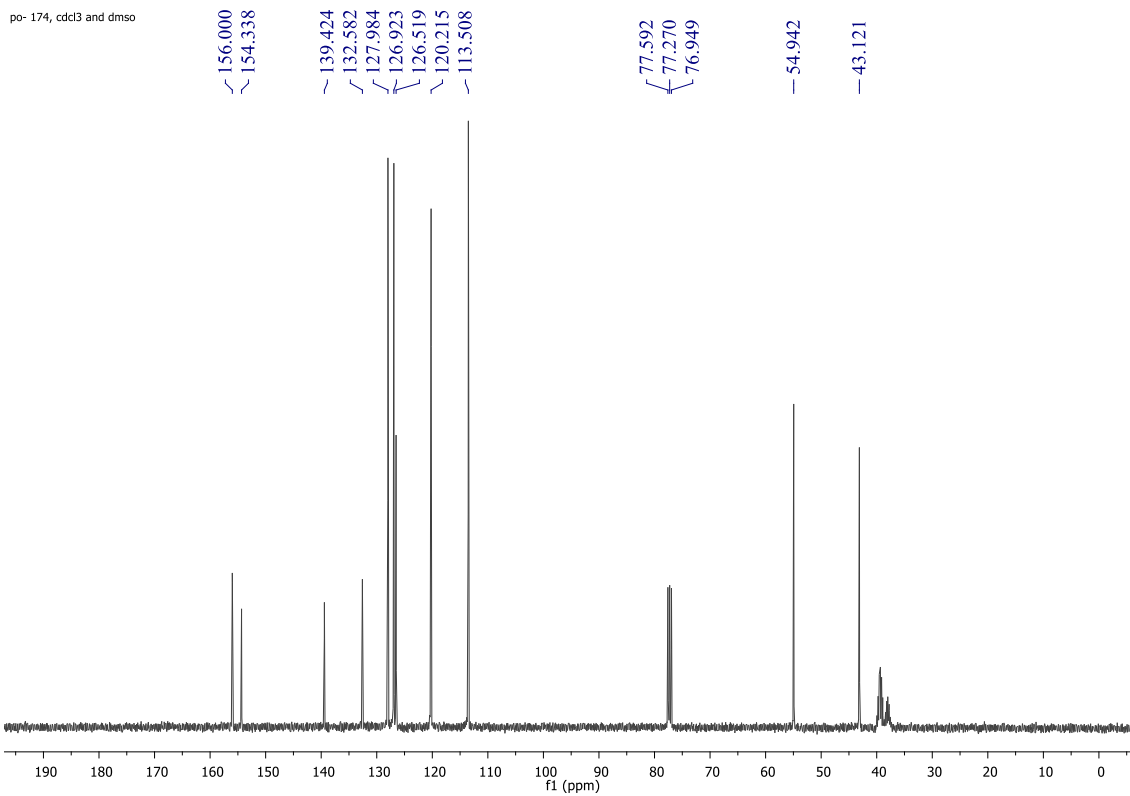

162

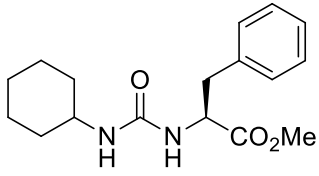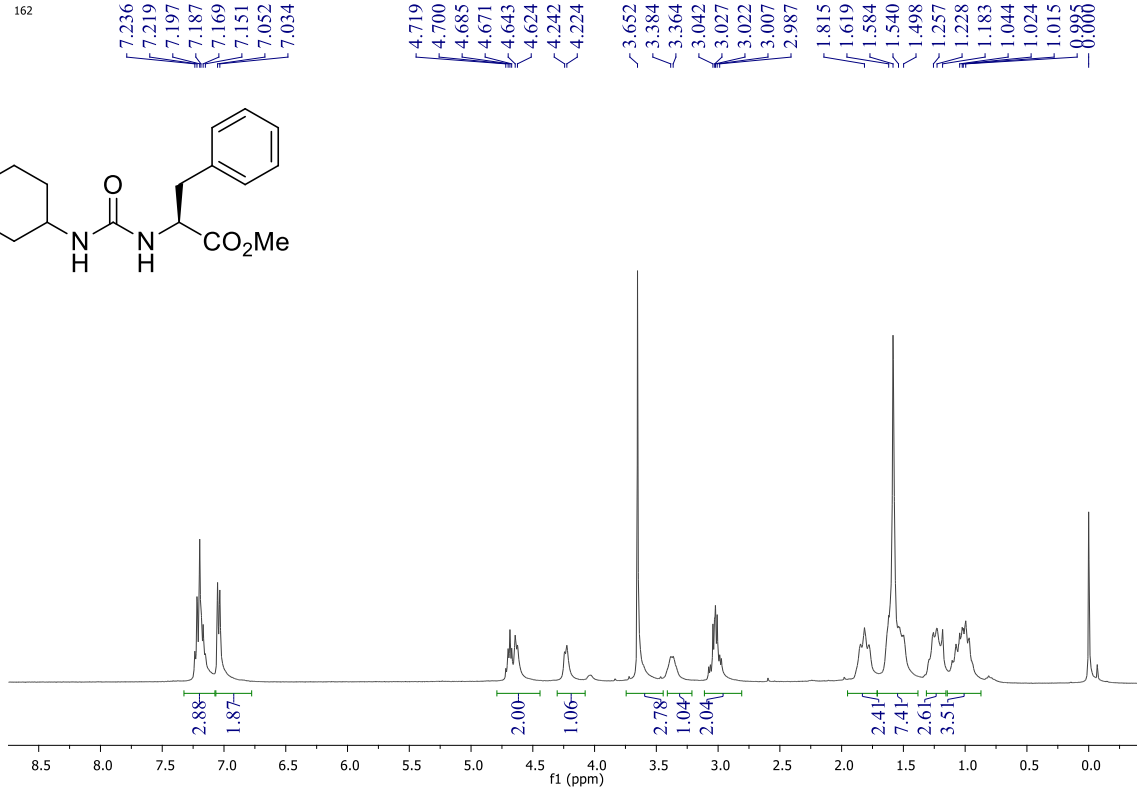

po-180

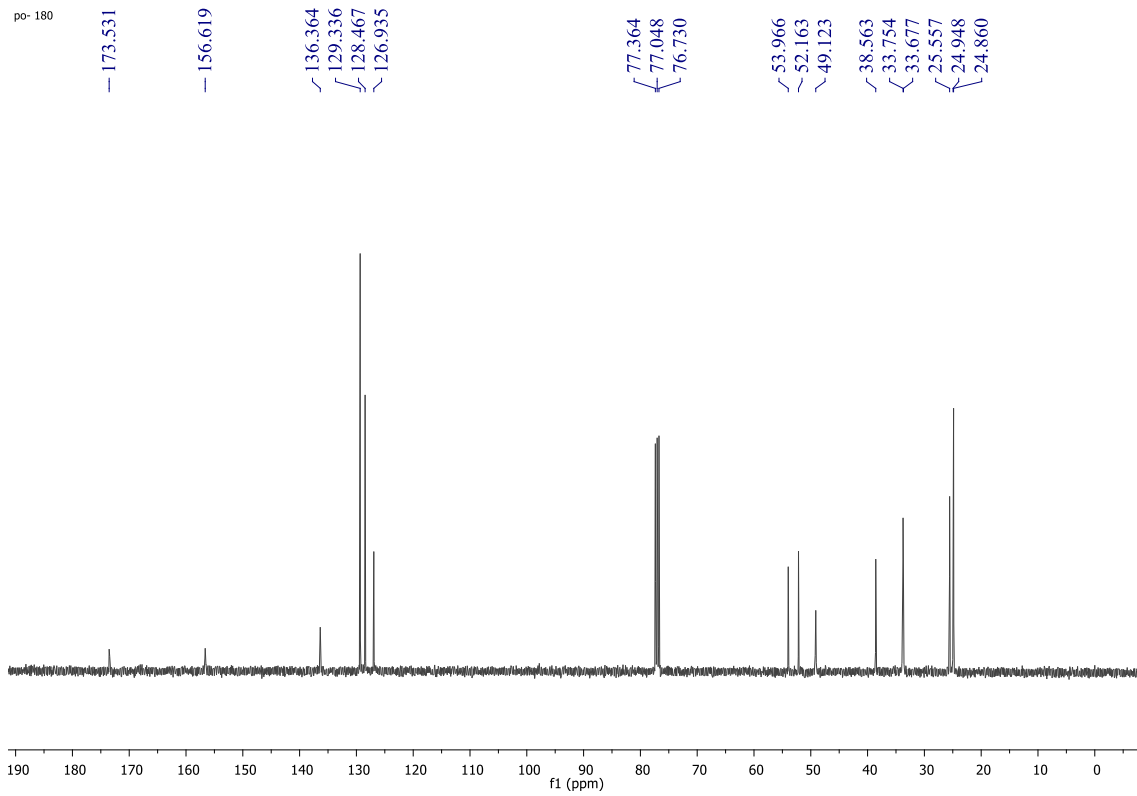

po-206

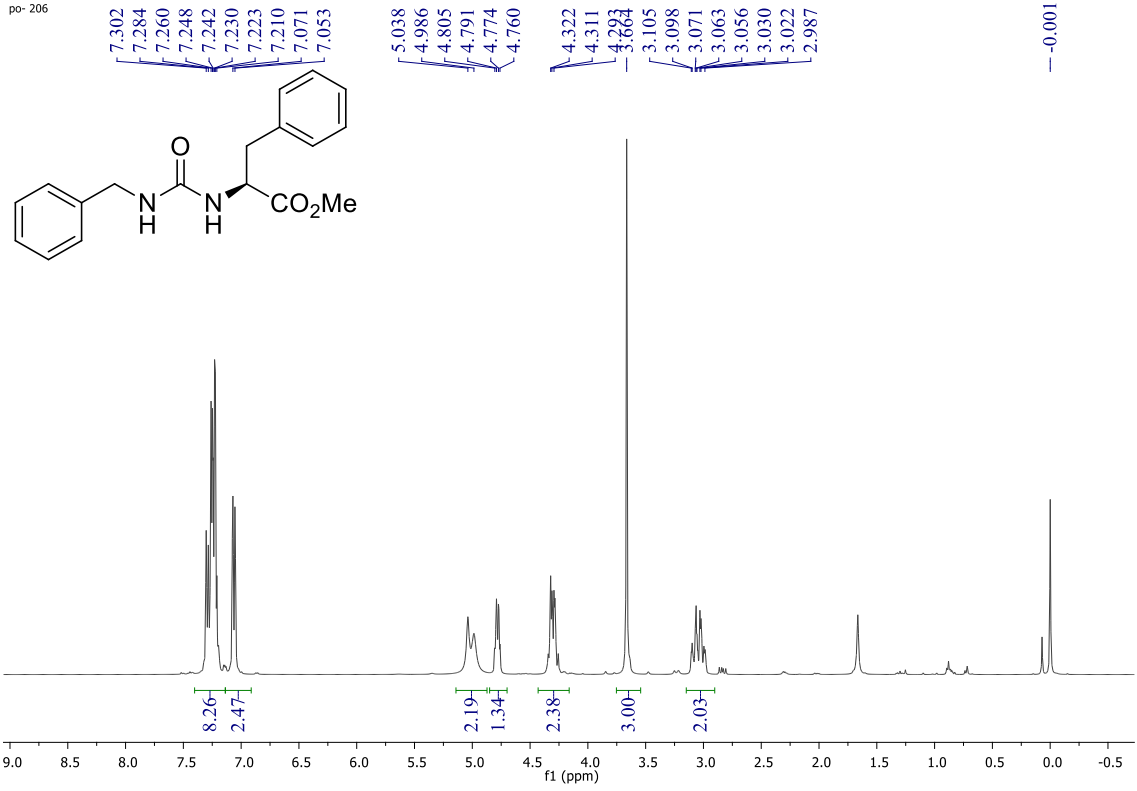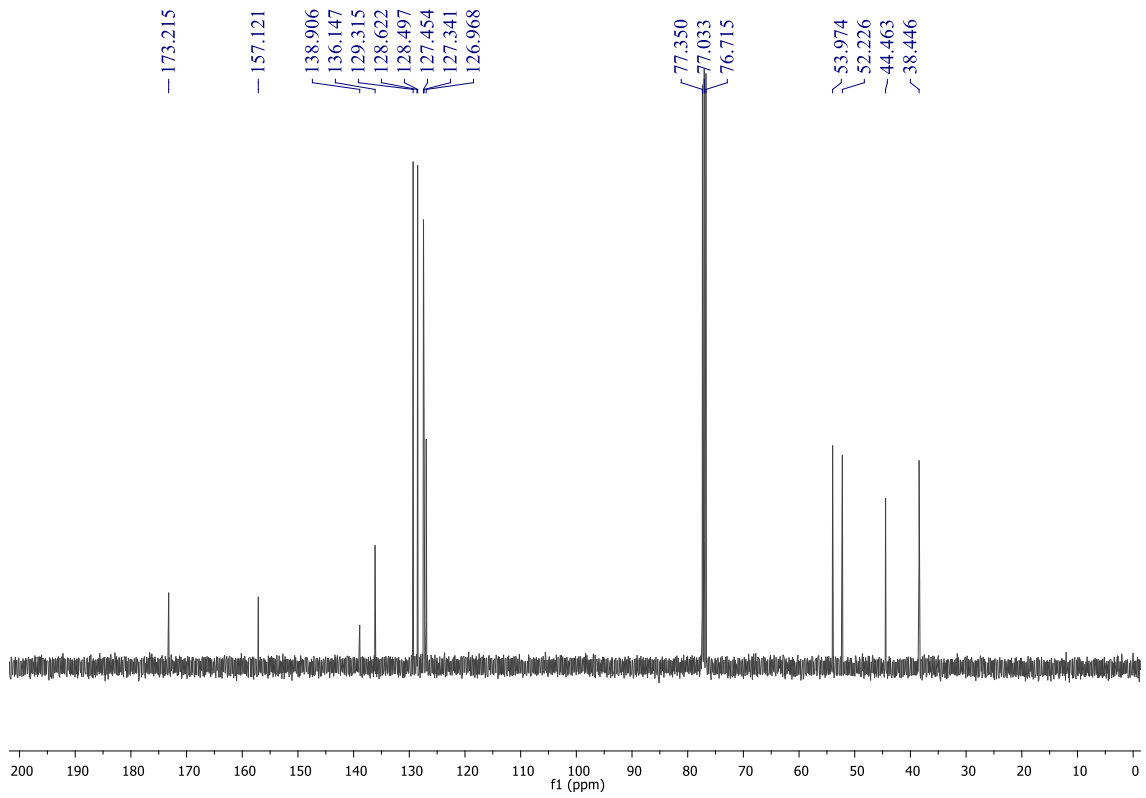

po-200

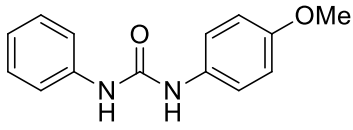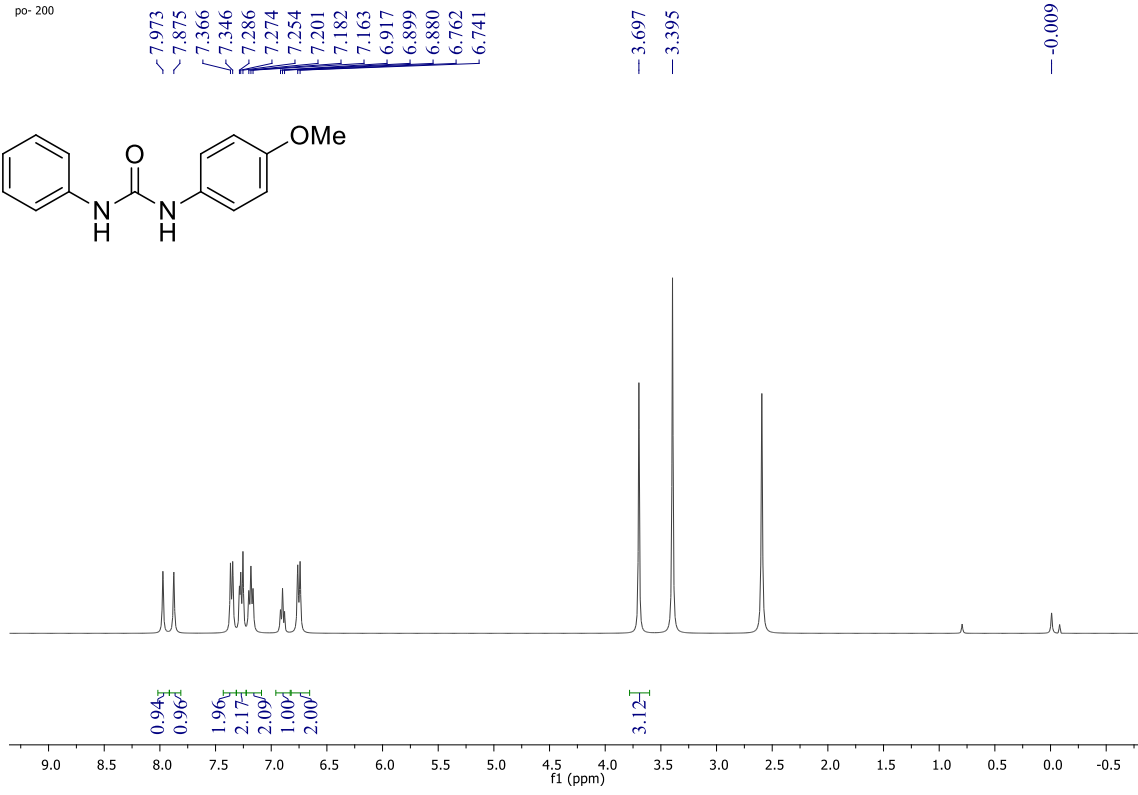

po-209

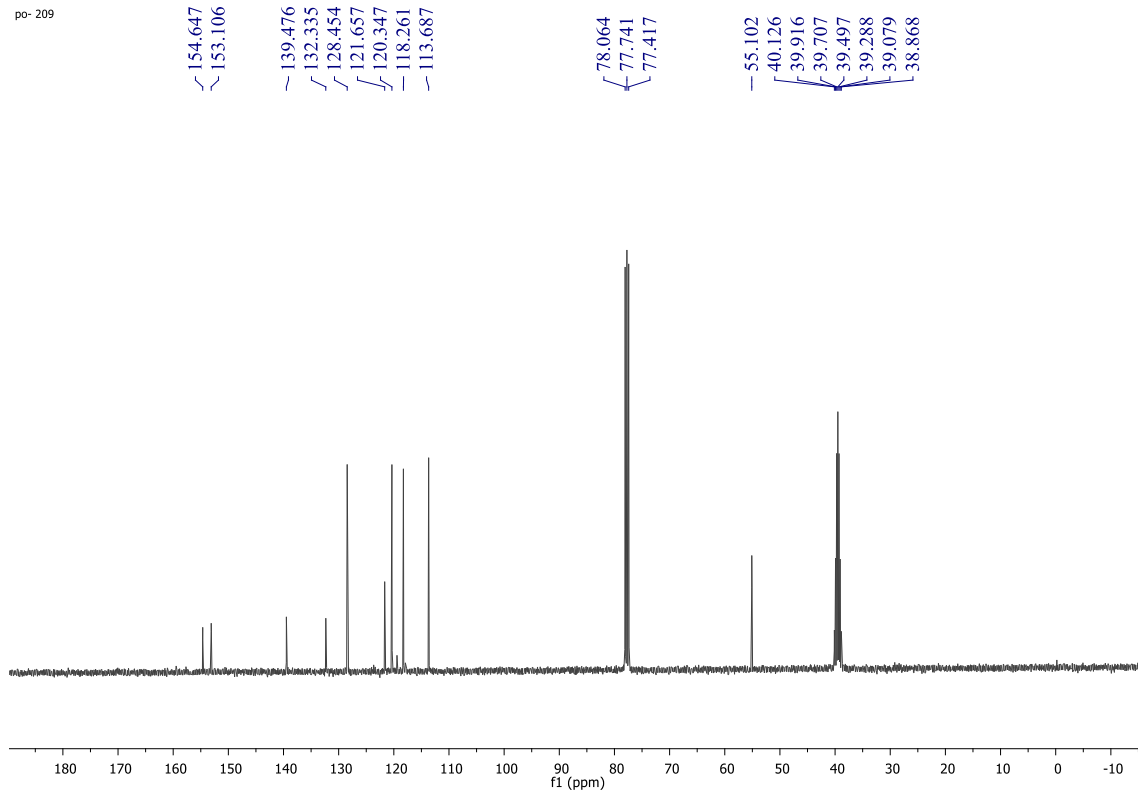

po-316

8.050  
7.317  
7.298  
7.260  
7.152  
7.133  
7.113  
7.113  
6.868  
6.850  
6.832

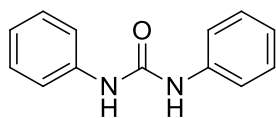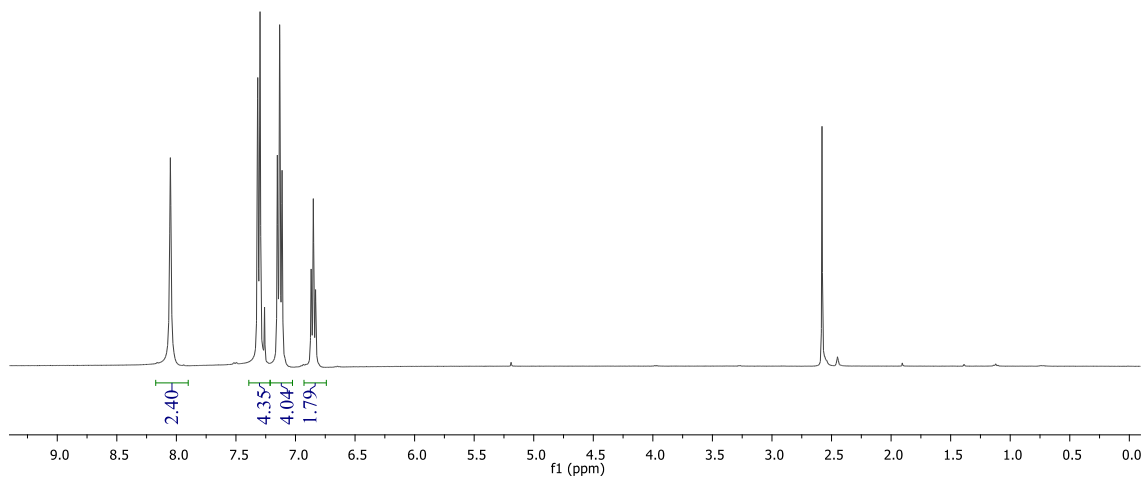

153.161  
139.435  
128.756  
122.170  
118.675  
77.613  
77.293  
76.974

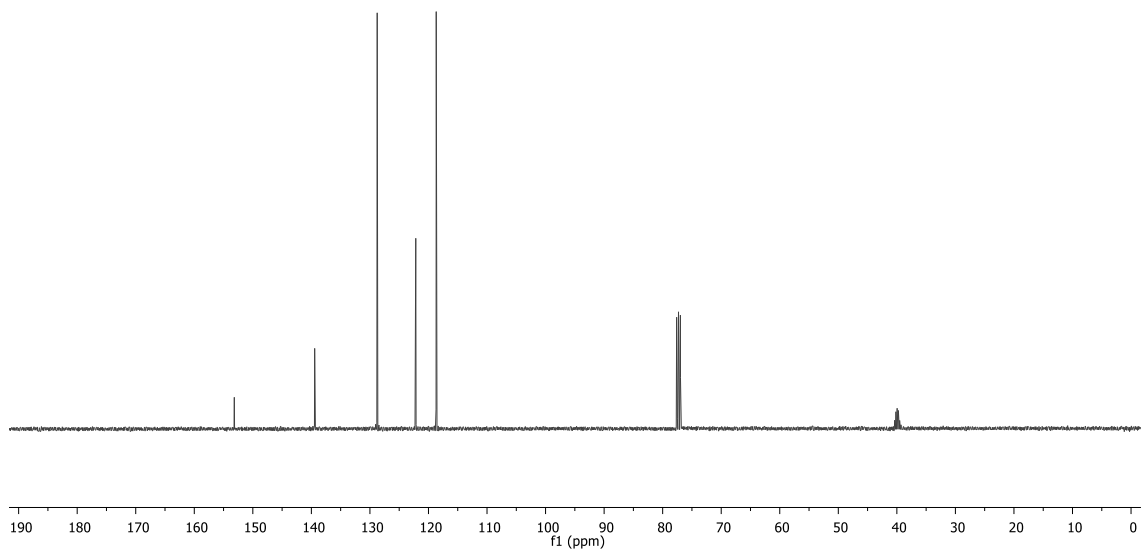



PO-315

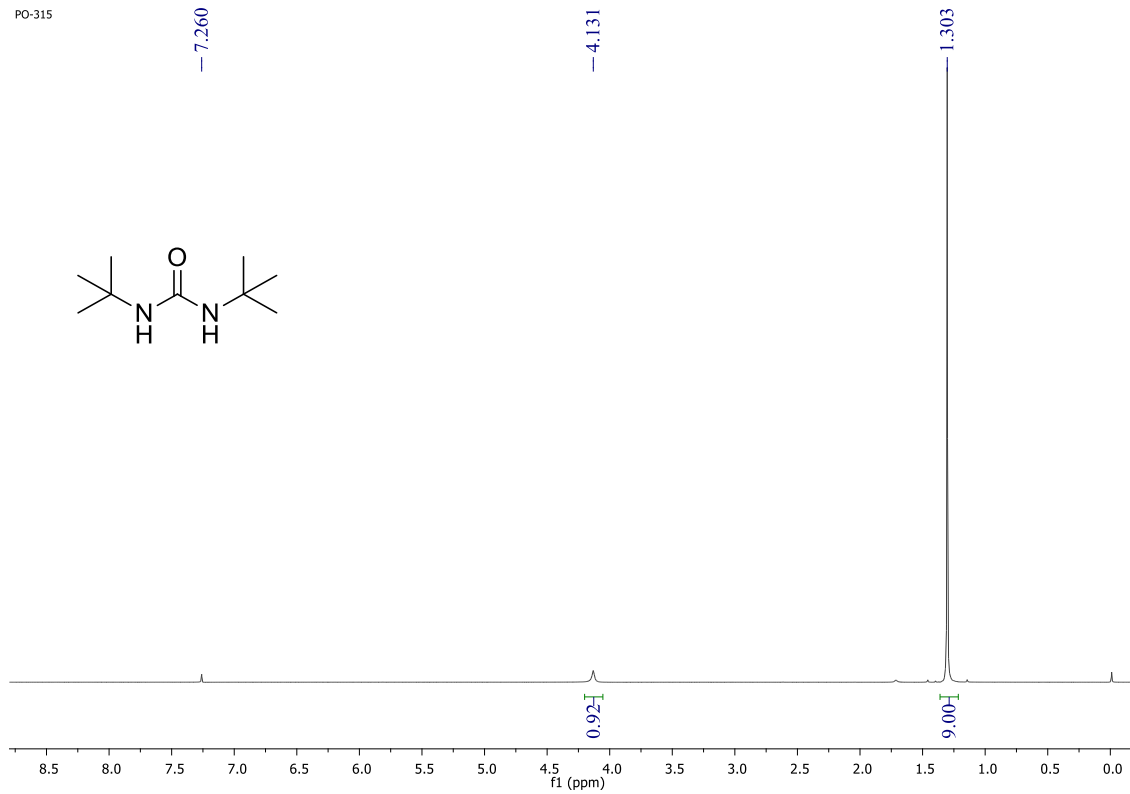

PO-313

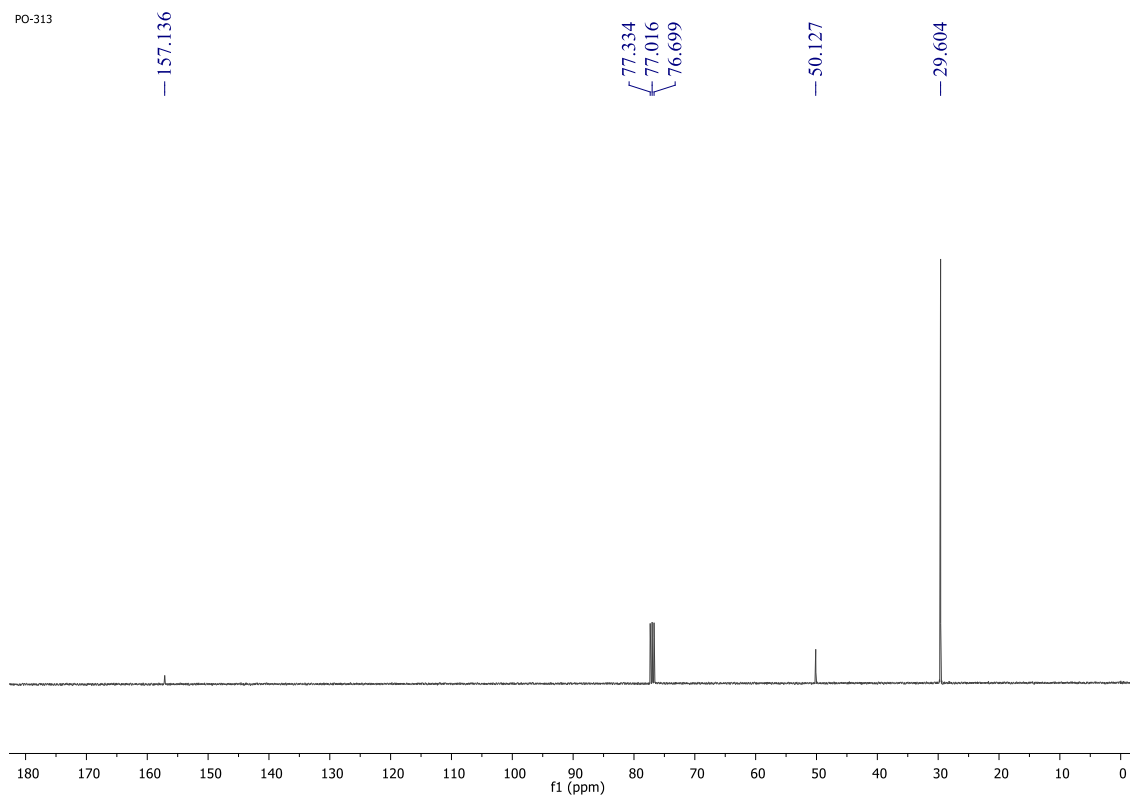

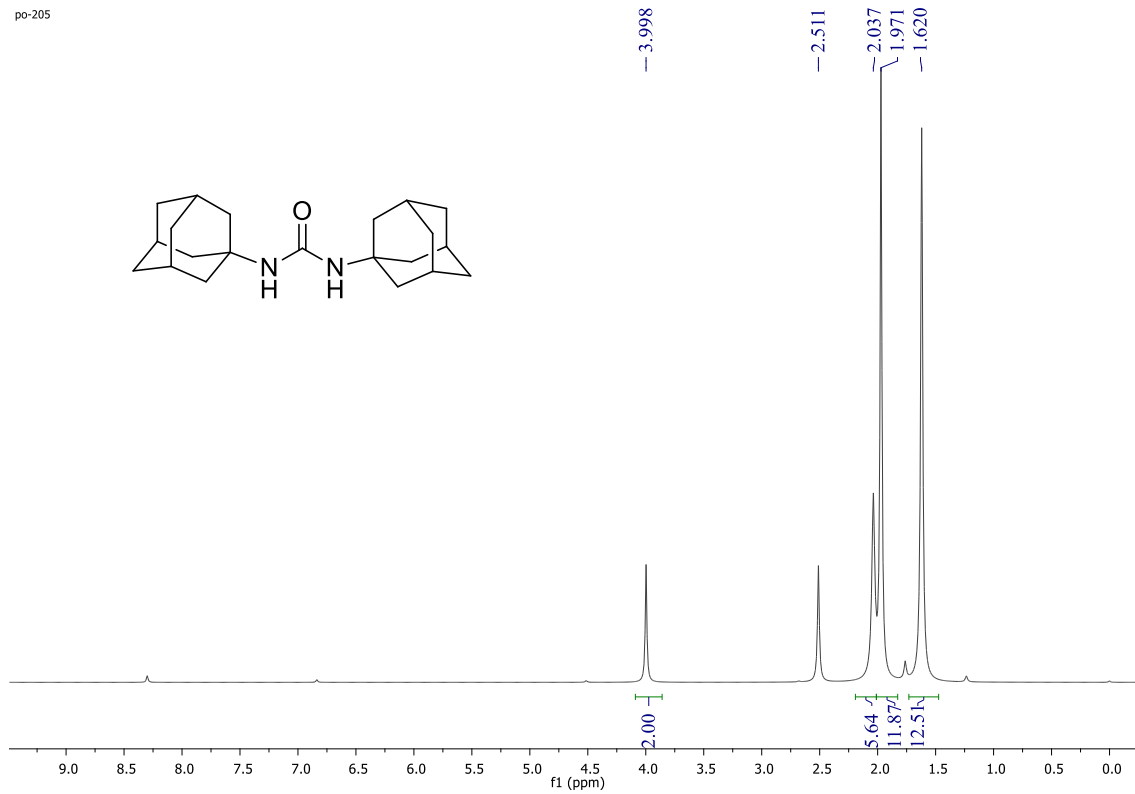

po-254

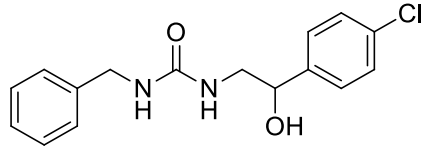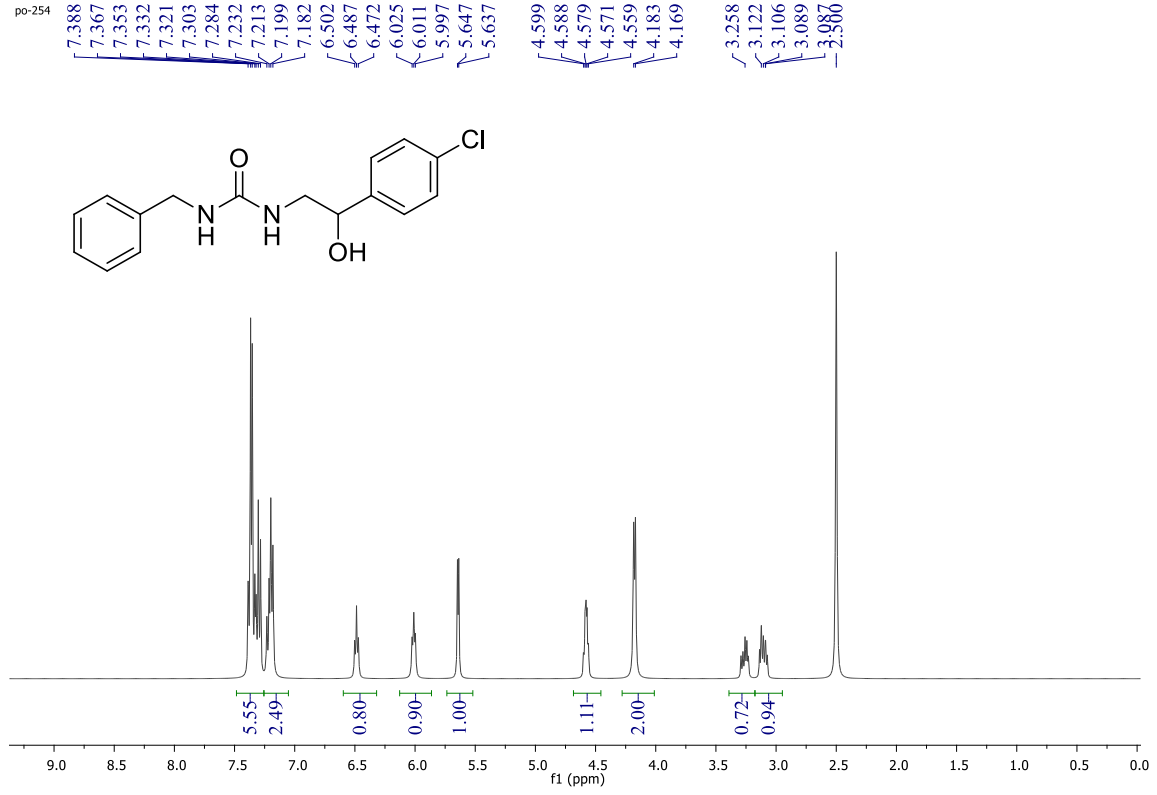

Chemical shifts (ppm): 158.162, 142.776, 140.732, 131.320, 128.144, 127.896, 127.856, 126.882, 126.497, 71.361, 47.174, 42.752, 39.977, 39.769, 39.560, 39.351, 39.143, 38.933, 38.726.

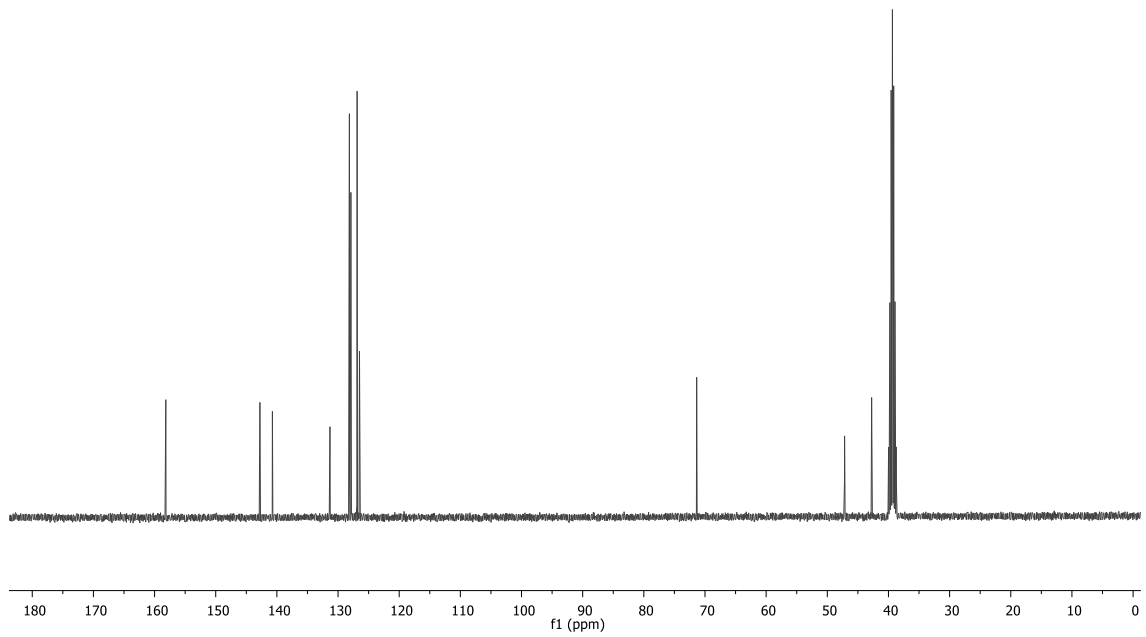

## 12. HPLC traces of chiral urea derivative

**(S)-methyl 2-(3-benzylureido)-3-phenylpropanoate 2a:** HPLC analysis was performed by using CHIRALCEL AS column, hexane/2-propanol 90:10, flow rate 1.0 mL/min, UV 210 nm, minor 25.5 and major 37.37 min.

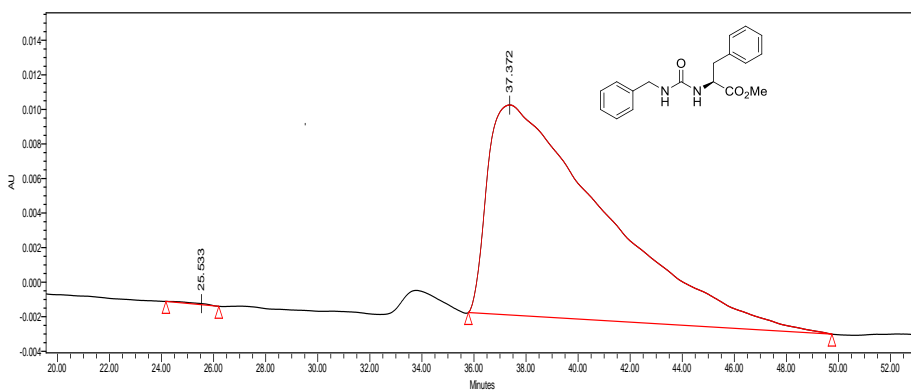

|   | Retention Time | Area    | % Area | Height |
|---|----------------|---------|--------|--------|
| 2 | 37.372         | 3832182 | 99.87  | 12155  |
| 1 | 25.533         | 5176    | 0.13   | 65     |

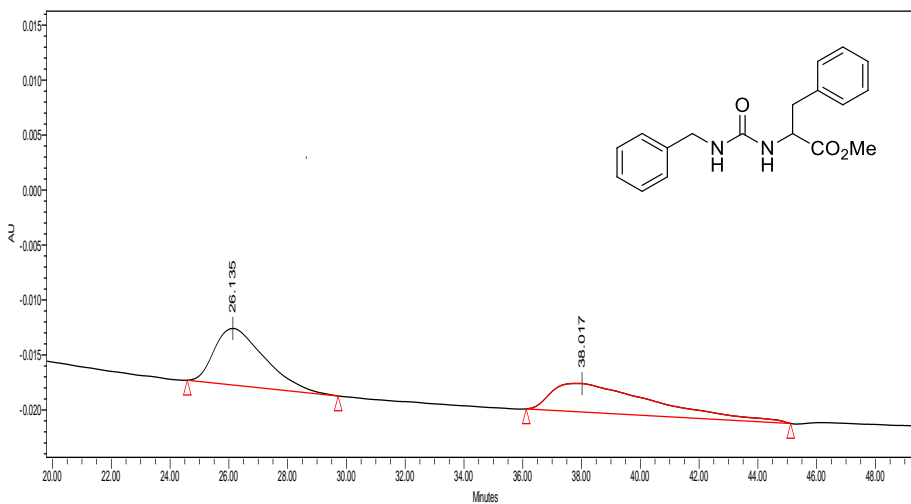

|   | Retention Time | Area   | % Area | Height |
|---|----------------|--------|--------|--------|
| 2 | 38.017         | 634571 | 50.79  | 2584   |
| 1 | 26.135         | 614897 | 49.21  | 5144   |

**(S)-Methyl 2-(3-Cyclohexylureido)-3-phenylpropanoate 2b:** HPLC analysis was performed by using CHIRALCEL AD-H column, hexane/2-propanol 85:15, flow rate 1.0 mL/min, UV 210 nm, minor 5.7 and major 9.7 min.

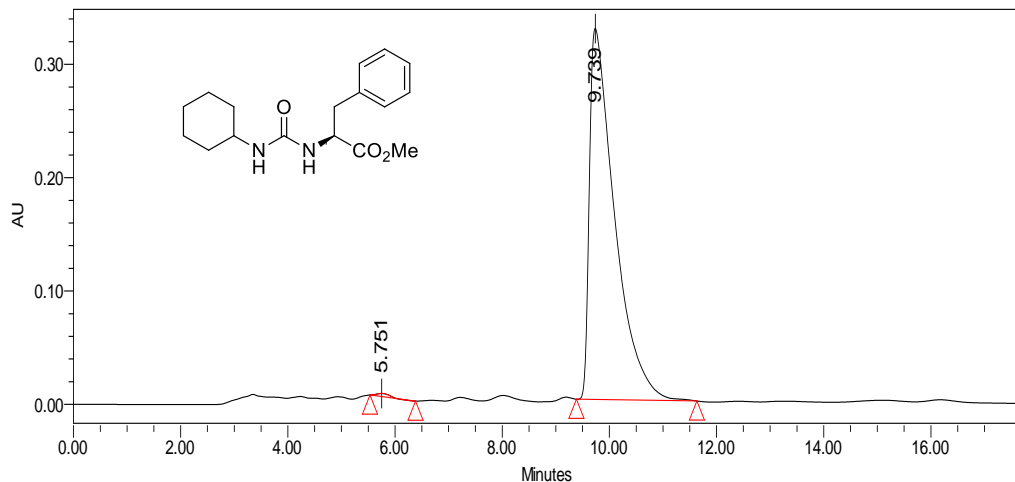

|   | Name | Retention Time | Area     | % Area | Height |
|---|------|----------------|----------|--------|--------|
| 1 |      | 5.751          | 71610    | 0.67   | 3422   |
| 2 |      | 9.739          | 10685514 | 99.33  | 327838 |

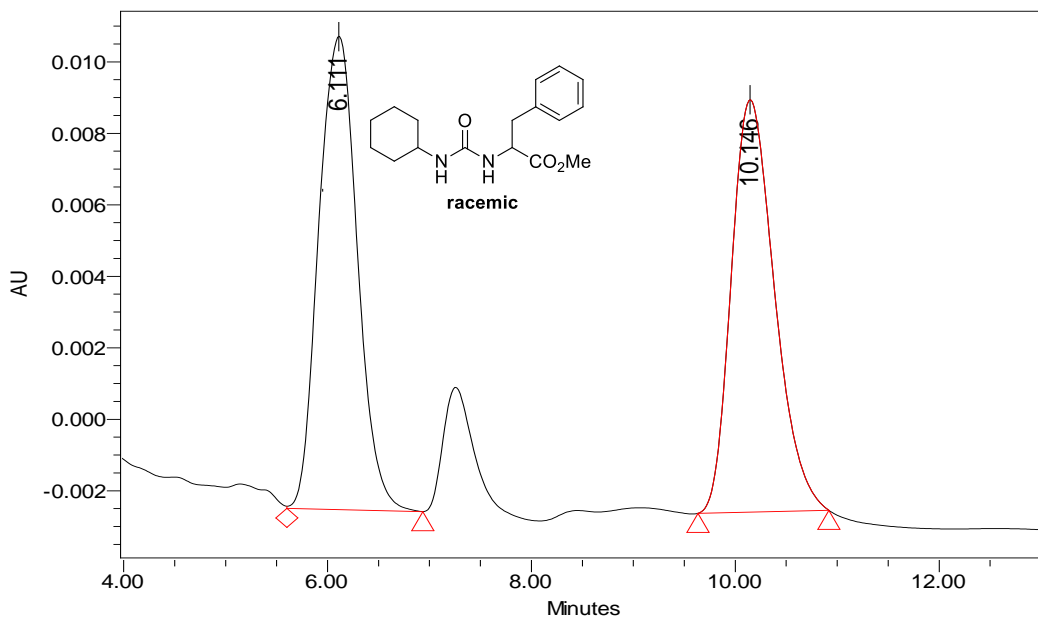

|   | Name | Retention Time | Area   | % Area | Height |
|---|------|----------------|--------|--------|--------|
| 1 |      | 6.111          | 346525 | 49.27  | 13205  |
| 2 |      | 10.146         | 356799 | 50.73  | 11687  |

## References

1. H. W. Johnson Jr., P. H. Daughhete Jr, *J. Org. Chem.* **1964**, 29, 246.
2. J. M. Borsus, R. Jérôme, Ph. Teyssié, *J. Appl. Polym. Sci.* **1981**, 26, 3027.
3. Enquist, P.-A.; Nilsson, P.; Edin, J.; Larhed, M. *Tetrahedron Lett.* **2005**, 46, 3335.
4. Liu, P.; Wang, Z.; Hu, X.; *Eur. J. Org. Chem.* **2012**, 1994.
5. Dube', P.; Nathel, N. F. F.; Vetelino, M.; Couturier, M.; Aboussafy, C. L.; Pichette, S.; Jorgensen, M. L.; Hardink, M. *Org. Lett.* **2009**, 24, 5622.
6. Chesney, A.; Steel, P. G.; Stonehouse, D. F. *J. Comb. Chem.* **2000**, 2, 434.
7. Kim, S. H.; Hong, S. H. *Org. Lett.* **2016**, 18, 212.
8. Saliu, F.; Rindone, B.; *Tetrahedron Lett.* **2010**, 51, 6301.
9. Spyropoulos, C.; Kokotos, C.G. *J. Org. Chem.* **2014**, 79, 4477.
10. Peterson, S. L.; Stucka, S. M.; Dinsmore, C. J. *Org. Lett.* **2010**, 12, 1340.
11. Zhao, J.; Li, Z.; Yan, S.; Xu, S.; Wang, M.-A.; Fu, B.; Zhang, Z. *Organic Letters* **2016**, 18, 1736.
12. Li, F.; Sun, C.; Shan, H.; Zou, X.; Xie, J. *Chemcatchem*, **2013**, 5, 1543.
13. Kim, I.-H.; Lee, I.-H.; Nishiwaki, H.; Hammockc, B. D.; Nishi, K. *Bioorg. Med. Chem.* **2014**, 22, 1163.
14. Vinogradova, E. V.; Fors, B. P.; Buchwald, S. L. *J. Am. Chem. Soc.* **2012**, 134, 11132.
15. Senadi, G. C.; Mutra, M. R.; Lu, T.-Y.; Wang, J.-J. *Green Chem.* **2017**, 19, 4272.
16. Yadav, D. K.; Yadav, A. K.; Srivastava, V. P.; Watal, G.; Yadav, L. D. S *Tetrahedron Lett.* **2012**, 53, 2890.
17. Kwon, H.; Lee K. A. *Org. Biomol. Chem.*, **2016**, 14, 7345.
18. Kumar, G. S.; Kumar, R. A.; Kumar, P. S.; Reddy, N. V.; Kumar, K. V.; Kantam, M. L.; Prabhakar, S.; Reddy K. R. *Chem. Commun.* **2013**, 49, 6686.
19. Xu, M.; Jupp, A. R.; Stephan D. W. *Angew. Chem. Int. Ed.* **2017**, 56, 14277.
20. Fenselau, A. H.; Moffatt, J. G. *J. Am. Chem. Soc.*, **1966**, 88, 1762.
